# Supplementary material
Source: PubMed Central journal article supplement (PMC4836847)
Supplement: NIHMS768898-supplement-Supporting_Information.pdf [file NIHMS768898-supplement-Supporting_Information.pdf]

## Table of Contents

|                                                                                                                      |            |
|----------------------------------------------------------------------------------------------------------------------|------------|
| <b>1. General information</b>                                                                                        | <b>S2</b>  |
| <b>2. Preparation of Allylic Electrophiles</b>                                                                       | <b>S2</b>  |
| <b>3. Preparation of (<math>\eta^6</math>-toluene)Cr(CO)<sub>3</sub> Derivatives</b>                                 | <b>S2</b>  |
| <b>4. Procedure and Characterization for the Pd-catalyzed Asymmetric Allylic Alkylation of cyclic electrophiles</b>  | <b>S2</b>  |
| <b>5. Procedure and Characterization for the Two-step One-pot Allylic Substitution/ Demetallation</b>                | <b>S7</b>  |
| <b>6. Procedure and Characterization for the Pd-catalyzed Asymmetric Allylic Alkylation of acyclic electrophiles</b> | <b>S8</b>  |
| <b>7. List of predosed chiral ligands screened for catalyst identification</b>                                       | <b>S12</b> |
| <b>8. NMR Spectra</b>                                                                                                | <b>S33</b> |
| <b>9. HPLC and SFC Chromatography of the Products</b>                                                                | <b>S59</b> |
| <b>10. References</b>                                                                                                | <b>S85</b> |

## 1. General Information

All reactions were carried out under an atmosphere of dry nitrogen. Anhydrous THF, toluene and 2-MeTHF were purchased from Sigma-Aldrich and used as solvent without further purification. Unless otherwise stated, reagents were commercially available and used as purchased. Chemicals were obtained from Sigma-Aldrich, Acros, or Matrix Scientific and solvents were purchased from Fisher Scientific. The progress of the reactions was monitored by thin-layer chromatography using Whatman Partisil K6F 250  $\mu\text{m}$  precoated 60 Å silica gel plates and visualized by short-wave ultraviolet light as well as by treatment with iodine. Flash chromatography was performed with silica gel (230–400 mesh). The NMR spectra were obtained using a Bruker 500 MHz Fourier-transform NMR spectrometer. The infrared spectra were obtained with KBr plates using a Perkin-Elmer Spectrum 1600 Series spectrometer. Optical rotations were recorded in HPLC-grade  $\text{CHCl}_3$  using a JASCO DIP-370 digital polarimeter. High resolution mass spectrometry (HRMS) data were obtained on a Waters LC-TOF mass spectrometer (model LCT-XE Premier) using electrospray ionization (ESI) in positive or negative mode. Melting points were determined on a Unimelt Thomas-Hoover melting point apparatus and are uncorrected.

## 2. Preparation of Allylic Electrophiles

Allylic electrophiles were prepared according to literature procedures.<sup>[1]</sup>

## 3. Preparation of ( $\eta^6$ -toluene) $\text{Cr}(\text{CO})_3$ Derivatives

Compounds **1a**,<sup>[2]</sup> **1b**,<sup>[3]</sup> **1c**,<sup>[4]</sup> **1d**,<sup>[4]</sup> **1e**,<sup>[4]</sup> **1f**,<sup>[4]</sup> **1h**,<sup>[5]</sup> **1i**,<sup>[5]</sup> **1j**,<sup>[3]</sup> **1k**,<sup>[6]</sup> and **1l**,<sup>[4]</sup> were prepared according to general literature procedures for the synthesis of arene tricarbonylchromium complexes. The complexes were crystallized from diethyl ether and hexanes to afford yellow crystalline solids.

Synthesis of ( $\eta^6$ -toluene) $\text{Cr}(\text{CO})_3$  derivatives (**1g**):

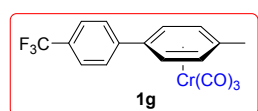

A solution of  $\text{Cr}(\text{CO})_6$  (1.10 g, 5.0 mmol), 4-trifluoromethyl-4'-methylbiphenyl (1.18 g, 5.0 mmol) and THF (3 mL) in DME (8 mL) was heated under reflux (oil bath temp = 120 °C) under a nitrogen atmosphere for 4 days. During this time, the solution turned from colorless to yellow-orange. The yellow–orange solution was cooled to room temperature. The solution was filtered through Celite, and then evaporated under reduced pressure. The crude product was purified by silica gel chromatography (hexanes/ethyl acetate 9:1) to afford **1g** (0.87 g, 47% yield) as a yellow solid.  $^1\text{H}$  NMR (500 MHz,  $\text{CDCl}_3$ ):  $\delta$  7.66 (d,  $J$  = 8.5 Hz, 2H), 7.59 (d,  $J$  = 8.0 Hz, 2H), 5.78 (d,  $J$  = 7.0 Hz, 2H), 5.31 (d,  $J$  = 6.5 Hz, 2H), 2.25 (s, 3H);  $^{13}\text{C}\{^1\text{H}\}$  NMR (125 MHz,  $\text{CDCl}_3$ ):  $\delta$  232.8, 140.6, 130.9 (q,  $J$  = 32.5 Hz), 127.6, 126.0 (q,  $J$  = 3.8 Hz), 121.9 (q,  $J$  = 271.3 Hz), 109.3, 105.3, 94.0, 92.4, 20.6; IR (neat):  $\lambda_{\text{max}}$  1961, 1872 (strong CO stretch), 1618, 1326, 1169, 1126, 1071, 837, 663, 625  $\text{cm}^{-1}$ ; HRMS : calcd for  $\text{C}_{17}\text{H}_{11}\text{O}_3\text{ClCrF}_3$  [ $\text{M}+\text{Cl}$ ] $^-$  406.9754, found 406.9757.

## 4. Procedure and Characterization for the Pd-catalyzed Asymmetric Allylic Alkylation of cyclic electrophiles

**General Procedure A:** To an oven-dried microwave vial equipped with a stir bar was added  $\text{Pd}(\text{OAc})_2$  (1.12 mg, 0.005 mmol) and Ph-Taniaphos (5.16 mg, 0.0075 mmol) under nitrogen atmosphere inside a glove box at room temperature. Next, 1.4 mL of dry 2-MeTHF and 0.6 mL of dry toluene were added sequentially via syringe to give a reddish brown solution. After the catalyst/ligand solution was stirred

for 30 min at 24 °C inside the glove box, ( $\eta^6$ -arene-CH<sub>2</sub>Z)Cr(CO)<sub>3</sub> (0.1 mmol, 1.0 equiv) was added to the reaction vial followed by LiN(SiMe<sub>3</sub>)<sub>2</sub> (50.2 mg, 0.3 mmol, 3 equiv) to give a brown solution. The microwave vial was sealed, removed from the glove box. The microwave vial was cooled to -30 °C, and PMDTA (33  $\mu$ L, 0.15 mmol, 1.5 equiv) was added via microsyringe and the resulting solution stirred for an additional 5 min. The allylic electrophile (0.2 mmol, 2.0 equiv) was then added via microsyringe under nitrogen atmosphere and the reaction mixture was stirred under nitrogen atmosphere for 12 h. The resulting reddish brown solution was then quenched by addition of 5 drops water via syringe, and then the vial opened to air. The reaction mixture was passed through a short pad of silica gel and rinsed with 10 mL 10:1 ethyl acetate: methanol to afford a reddish solution. The solvent was removed by rotary evaporator. The reddish brown residue was purified by flash chromatography.

### Optimization of the solvent composition

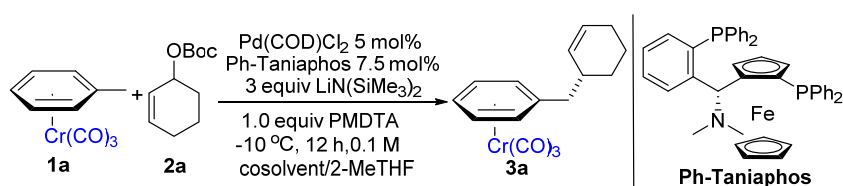

| entry | cosolvent (%) <sup>a</sup> | yield (%) <sup>b</sup> | ee (%) <sup>c</sup> |
|-------|----------------------------|------------------------|---------------------|
| 1     | Tol (10)                   | 69                     | 86.4                |
| 2     | Tol (20)                   | 72                     | 86.4                |
| 3     | Tol (30)                   | 79                     | 86.4                |
| 4     | Tol (40)                   | 66                     | 86.9                |
| 5     | Tol (50)                   | 54                     | 86.9                |
| 6     | Tol (100)                  | trace                  | --                  |

a: Cosolvent indicates toluene by volume in 2-MeTHF. b: Yields determined by <sup>1</sup>H NMR analysis of crude mixtures with CH<sub>2</sub>Br<sub>2</sub> as internal standard. c: The ee was determined by chiral HPLC.

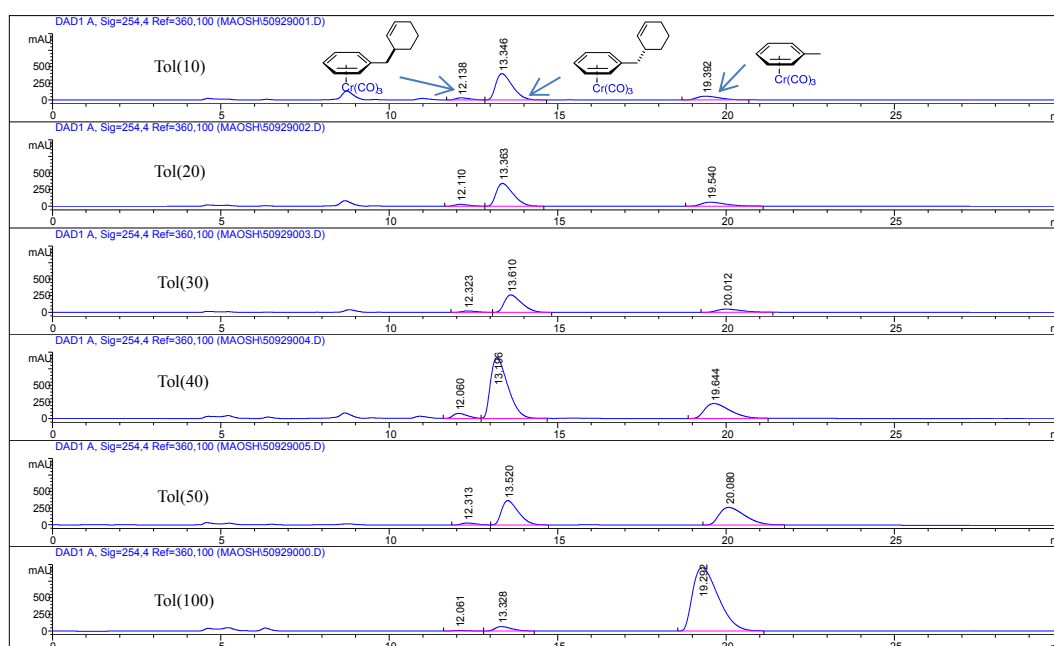

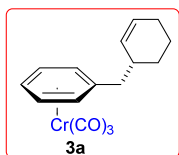

**(-)-(η<sup>6</sup>-(2-Cyclohexen-1-ylmethyl)-benzene)Cr(CO)<sub>3</sub> (3a):** The reaction was performed following General Procedure A with **1a** (22.8 mg, 0.1 mmol), LiN(SiMe<sub>3</sub>)<sub>2</sub> (50.2 mg, 0.3 mmol) and **2a** (40.0 μL, 0.2 mmol). The crude material was purified by flash chromatography on silica gel (eluted with EtOAc:hexanes = 1:10) to give the product (28.1 mg, 91% yield, 92% ee) as a yellow solid. [α]<sub>D</sub><sup>25</sup> = -74.0 (*c* 1.4, CHCl<sub>3</sub>). The ee was determined by HPLC with a Daicel Chiralcel OD-H column (1% isopropanol in hexanes, 1 mL/min, 254 nm, minor t<sub>r</sub> = 12.80 min, major t<sub>r</sub> = 14.35 min). The NMR spectral data match the previously published data.<sup>[4]</sup>

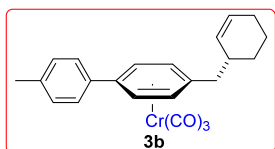

**(-)-(η<sup>6</sup>-(2-Cyclohexen-1-ylmethyl)-4-(*p*-tolyl)-benzene)Cr(CO)<sub>3</sub> (3b):** The reaction was performed following General Procedure A with **1b** (31.8 mg, 0.1 mmol), LiN(SiMe<sub>3</sub>)<sub>2</sub> (50.2 mg, 0.3 mmol) and **2a** (40.0 μL, 0.2 mmol). The crude material was purified by flash chromatography on silica gel (eluted with EtOAc:hexanes = 1:15) to give the product (34.2 mg, 86% yield, 94% ee) as a yellow solid. [α]<sub>D</sub><sup>25</sup> = -59.7 (*c* 0.6, CHCl<sub>3</sub>). The ee was determined by HPLC with a Daicel Chiralpak AD-H column (5% isopropanol in hexanes, 0.8 mL/min, 254 nm, major t<sub>r</sub> = 8.96 min, minor t<sub>r</sub> = 11.63 min). The NMR spectral data match the previously published data.<sup>[4]</sup>

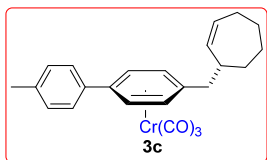

**(-)-(η<sup>6</sup>-(2-Cycloheptene-1-ylmethyl)-4-(*p*-tolyl)-benzene)Cr(CO)<sub>3</sub> (3c):** The reaction was performed following General Procedure A with **1b** (31.8 mg, 0.1 mmol), LiN(SiMe<sub>3</sub>)<sub>2</sub> (67.0 mg, 0.4 mmol) and **2b** (63.6 mg, 0.3 mmol). The crude material was purified by flash chromatography on silica gel (eluted with EtOAc:hexanes = 1:15) to give the product (35.1 mg, 85% yield, 82% ee) as a yellow solid. [α]<sub>D</sub><sup>25</sup> = -15.1 (*c* 1.0, CHCl<sub>3</sub>). The ee was determined by HPLC with a Daicel Chiralpak AD-H column (5% isopropanol in hexanes, 1 mL/min, 254 nm, major t<sub>r</sub> = 7.00 min, minor t<sub>r</sub> = 8.22 min). <sup>1</sup>H NMR (500 MHz, CDCl<sub>3</sub>) δ: 7.38 (d, *J* = 8.0 Hz, 2H), 7.20 (d, *J* = 7.5 Hz, 2H), 5.85-5.80 (m, 1H), 5.74 (d, *J* = 6.5 Hz, 2H), 5.59 (d, *J* = 12.0 Hz, 1H), 5.35 (d, *J* = 6.5 Hz, 2H), 2.48-2.40 (m, 3H), 2.37 (s, 3H), 2.19-2.10 (m, 2H), 1.98-1.94 (m, 1H), 1.74-1.66 (m, 2H), 1.59-1.56 (m, 1H), 1.39-1.35 (m, 2H). <sup>13</sup>C{<sup>1</sup>H} NMR (125 MHz, CDCl<sub>3</sub>) δ: 233.4, 139.1, 135.5, 133.6, 132.8, 129.7, 127.1, 111.2, 109.0, 93.7, 93.2, 42.0, 41.9, 33.2, 30.3, 28.9, 26.9, 21.4. IR (neat): 2922, 2852, 1962, 1881 (strong CO stretch), 1472, 1445, 817, 668, 625, 533. HRMS: calcd for C<sub>24</sub>H<sub>24</sub>O<sub>3</sub>Cr [M]<sup>+</sup> 412.1131, found 412.1132.

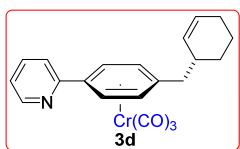

**(-)-(η<sup>6</sup>-(2-Cyclohexen-1-ylmethyl)-4-(2-pyridyl)-benzene)Cr(CO)<sub>3</sub> (3d):** The reaction was performed following General Procedure A with **1c** (30.5 mg, 0.1 mmol), LiN(SiMe<sub>3</sub>)<sub>2</sub> (50.2 mg, 0.3 mmol) and **2a** (40.0 μL, 0.2 mmol). The crude material was purified by flash chromatography on silica gel (eluted with EtOAc:hexanes = 1:20) to give the product (30.8 mg, 80% yield, 96% ee) as a yellow solid. [α]<sub>D</sub><sup>25</sup> = -73.9 (*c* 0.5, CHCl<sub>3</sub>). The ee was determined by HPLC with a Daicel Chiralpak AD-H column (5% isopropanol in hexanes, 1 mL/min, 254 nm, major t<sub>r</sub> = 12.29 min, minor t<sub>r</sub> = 15.21 min). The NMR spectral data match the previously published data.<sup>[4]</sup>

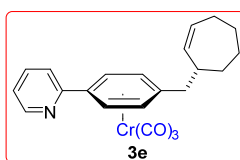

**(-)-(η<sup>6</sup>-(2-Cycloheptene-1-ylmethyl)-4-(2-pyridyl)-benzene)Cr(CO)<sub>3</sub> (3e):** The reaction was performed following General Procedure A with **1c** (30.5 mg,

0.1 mmol), LiN(SiMe<sub>3</sub>)<sub>2</sub> (67.0 mg, 0.4 mmol) and **2b** (63.6 mg, 0.3 mmol). The crude material was purified by flash chromatography on silica gel (eluted with EtOAc:hexanes = 1:15) to give the product (27.9 mg, 70% yield, 87% ee) as a yellow solid.  $[\alpha]_D^{25} = -19.3$  (*c* 0.7, CHCl<sub>3</sub>). The ee was determined by HPLC with a Daicel Chiralpak AD-H column (10% isopropanol in hexanes, 1 mL/min, 230 nm, major *t<sub>r</sub>* = 9.03 min, minor *t<sub>r</sub>* = 10.85 min). <sup>1</sup>H NMR (500 MHz, CDCl<sub>3</sub>) δ: 8.59 (d, *J* = 4.5 Hz, 1H), 7.75-7.71 (m, 1H), 7.54 (d, *J* = 8.0 Hz, 1H), 7.25-7.23 (m, 1H), 6.24 (d, *J* = 6.5 Hz, 2H), 5.83-5.81 (m, 1H), 5.58 (d, *J* = 11.5 Hz, 1H), 5.36 (d, *J* = 7.0 Hz, 2H), 2.52-2.49 (m, 2H), 2.46-2.43 (m, 1H), 2.17-2.10 (m, 2H), 1.97-1.93 (m, 1H), 1.75-1.65 (m, 2H), 1.59-1.55 (m, 1H), 1.38-1.33 (m, 2H). <sup>13</sup>C{<sup>1</sup>H} NMR (125 MHz, CDCl<sub>3</sub>) δ: 233.0, 153.9, 149.7, 137.1, 135.4, 132.8, 123.5, 120.1, 112.5, 103.9, 93.1, 93.00, 92.95, 42.1, 42.0, 33.1, 30.2, 28.9, 26.9. IR (neat): 2922, 2851, 1963, 1885 (strong CO stretch), 1586, 1571, 1461, 1432, 786, 666, 623, 532. HRMS: calcd for C<sub>22</sub>H<sub>22</sub>NO<sub>3</sub>Cr [M+H]<sup>+</sup> 400.1005, found 400.1001.

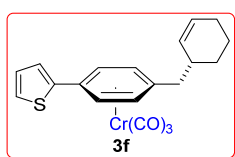

**(-)-(η<sup>6</sup>-(2-Cyclohexen-1-ylmethyl)-4-(2-thiophenyl)-benzene)Cr(CO)<sub>3</sub> (**3f**):**

The reaction was performed following General Procedure A with **1d** (31.0 mg, 0.1 mmol), LiN(SiMe<sub>3</sub>)<sub>2</sub> (50.2 mg, 0.30 mmol) and **2a** (40 μL, 0.2 mmol). The crude material was purified by flash chromatography on silica gel (eluted with EtOAc:hexanes = 1:15) to give the product (32.8 mg, 84% yield, 96% ee) as a yellow solid.  $[\alpha]_D^{25} = -69.2$  (*c* 0.5, CHCl<sub>3</sub>). The ee was determined by HPLC with a Daicel Chiralpak AD-H column (5% isopropanol in hexanes, 1 mL/min, 254 nm, major *t<sub>r</sub>* = 8.92 min, minor *t<sub>r</sub>* = 12.28 min). The NMR spectral data match the previously published data.<sup>[4]</sup>

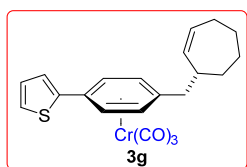

**(-)-(η<sup>6</sup>-(2-Cycloheptene-1-ylmethyl)-4-(2-thiophenyl)-benzene)Cr(CO)<sub>3</sub> (**3g**):**

The reaction was performed following General Procedure A with **1d** (31.0 mg, 0.1 mmol), LiN(SiMe<sub>3</sub>)<sub>2</sub> (67.0 mg, 0.4 mmol) and **2b** (63.6 mg, 0.3 mmol). The crude material was purified by flash chromatography on silica gel (eluted with EtOAc:hexanes = 1:20) to give the product (22.2 mg, 55% yield, 83% ee) as a yellow solid.  $[\alpha]_D^{25} = -20.0$  (*c* 0.7, CHCl<sub>3</sub>). The ee was determined by HPLC with a Daicel Chiralpak AD-H column (10% isopropanol in hexanes, 1 mL/min, 254 nm, major *t<sub>r</sub>* = 11.94 min, minor *t<sub>r</sub>* = 15.02 min). <sup>1</sup>H NMR (500 MHz, CDCl<sub>3</sub>) δ: 7.28 (dd, *J* = 5.0 Hz, 1.0 Hz, 1H), 7.23 (dd, *J* = 3.5 Hz, 1.0 Hz, 1H), 7.02 (dd, *J* = 4.5 Hz, 3.5 Hz, 1H), 5.83-5.81 (m, 1H), 5.76 (d, *J* = 6.5 Hz 2H), 5.58-5.56 (m, 1H), 5.33 (d, *J* = 6.5 Hz 2H), 2.47-2.36 (m, 3H), 2.19-2.09 (m, 2H), 1.98-1.93 (m, 1H), 1.73-1.65 (m, 2H), 1.59-1.54 (m, 1H), 1.38-1.32 (m, 2H). <sup>13</sup>C{<sup>1</sup>H} NMR (125 MHz, CDCl<sub>3</sub>) δ: 233.1, 139.9, 135.4, 132.8, 128.1, 126.3, 125.0, 110.9, 102.0, 93.3, 91.8, 91.7, 41.99, 41.97, 33.2, 30.3, 28.9, 26.9. IR (neat): 2921, 2851, 1960, 1875 (strong CO stretch), 1471, 1444, 1347, 1216, 852, 702, 666, 624, 531. HRMS: calcd for C<sub>21</sub>H<sub>20</sub>O<sub>3</sub>SCr [M]<sup>+</sup> 404.0538, found 404.0548.

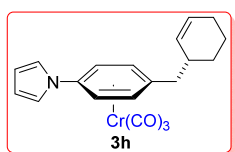

**(-)-(η<sup>6</sup>-(2-Cyclohexen-1-ylmethyl)-4-(N-pyrrolyl)-benzene)Cr(CO)<sub>3</sub> (**3h**):**

The reaction was performed following General Procedure A with **1e** (29.3, 0.1 mmol), LiN(SiMe<sub>3</sub>)<sub>2</sub> (50.2 mg, 0.30 mmol) and **2a** (40 μL, 0.2 mmol). The crude material was purified by flash chromatography on silica gel (eluted with EtOAc:hexanes = 1:10) to give the product (30.6, 82% yield, 94% ee) as a yellow solid.  $[\alpha]_D^{25} = -68.5$  (*c* 1.0, CHCl<sub>3</sub>). The ee was determined by HPLC with a Daicel Chiralpak AD-H column (5% isopropanol in hexanes, 1 mL/min, 254 nm, major *t<sub>r</sub>* = 9.37 min, minor *t<sub>r</sub>* = 14.20 min). The NMR

spectral data match the previously published data.<sup>[4]</sup>

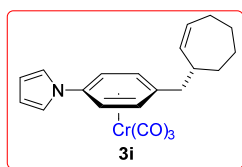

**(-)-(η<sup>6</sup>-(2-Cycloheptene-1-ylmethyl)-4-(N-pyrrolyl)-benzene)Cr(CO)<sub>3</sub> (3i):** The reaction was performed following General Procedure A with **1e** (39.3 mg, 0.1 mmol), LiN(SiMe<sub>3</sub>)<sub>2</sub> (67.0 mg, 0.40 mmol) and **2b** (63.6 mg, 0.3 mmol). The crude material was purified by flash chromatography on silica gel (eluted with EtOAc:hexanes = 1:15) to give the product (24.4 mg, 63% yield, 80% ee) as a yellow solid.  $[\alpha]_D^{25} = -17.1$  (*c* 0.9, CHCl<sub>3</sub>). The ee was determined by HPLC with a Daicel Chiralpak AD-H column (10% isopropanol in hexanes, 1 mL/min, 254 nm, major *t<sub>r</sub>* = 9.41 min, minor *t<sub>r</sub>* = 12.03 min). <sup>1</sup>H NMR (500 MHz, CDCl<sub>3</sub>) δ: .696 (t, *J* = 2.0 Hz, 2H), 6.29 (t, *J* = 2.5 Hz, 2H), 5.84-5.81 (m, 1H), 5.60 (d, *J* = 6.5 Hz 2H), 5.56-5.54 (m, 1H), 5.44 (d, *J* = 6.5 Hz 2H), 2.46-2.32 (m, 3H), 2.17-2.10 (m, 2H), 1.97-1.93 (m, 1H), 1.72-1.65 (m, 2H), 1.59-1.54 (m, 1H), 1.37-1.31 (m, 2H). <sup>13</sup>C{<sup>1</sup>H} NMR (125 MHz, CDCl<sub>3</sub>) δ: 232.7, 135.2, 132.9, 119.9, 116.5, 111.8, 108.4, 94.0, 84.8, 84.7, 42.0, 41.6, 33.2, 30.3, 28.9, 26.9. IR (neat): 2922, 2851, 1965, 1883 (strong CO stretch), 1543, 1491, 1326, 1117, 1065, 918, 726, 668, 624, 533. HRMS: calcd for C<sub>21</sub>H<sub>21</sub>NO<sub>3</sub>Cr [M]<sup>+</sup> 387.0927, found 387.0924.

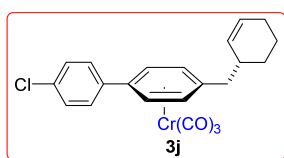

**(-)-(η<sup>6</sup>-(2-Cyclohexen-1-ylmethyl)-4-(p-chlorophenyl)-benzene)Cr(CO)<sub>3</sub> (3j):** The reaction was performed following General Procedure A with **1f** (33.9 mg, 0.1 mmol), LiN(SiMe<sub>3</sub>)<sub>2</sub> (50.2 mg, 0.30 mmol) and **2a** (40 μL, 0.2 mmol). The crude material was purified by flash chromatography on silica gel (eluted with EtOAc:hexanes = 1:10) to give the product (34.8 mg, 83% yield, 94% ee) as a yellow solid.  $[\alpha]_D^{25} = -49.8$  (*c* 0.6, CHCl<sub>3</sub>). The ee was determined by HPLC with a Daicel Chiralpak AD-H column (10% isopropanol in hexanes, 1 mL/min, 254 nm, major *t<sub>r</sub>* = 8.81 min, minor *t<sub>r</sub>* = 11.86 min). The NMR spectral data match the previously published data.<sup>[4]</sup>

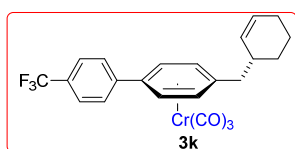

**(-)-(η<sup>6</sup>-(2-Cyclohexen-1-ylmethyl)-4-(p-trifluoromethylphenyl)-benzene)Cr(CO)<sub>3</sub> (3k):** The reaction was performed following General Procedure A with **1g** (37.2 mg, 0.1 mmol), LiN(SiMe<sub>3</sub>)<sub>2</sub> (50.2 mg, 0.3 mmol) and **2a** (40 μL, 0.2 mmol) for 4h. The crude material was purified by flash chromatography on silica gel (eluted with EtOAc:hexanes = 1:10) to give the product (38.0 mg, 84% yield, 94% ee) as a yellow solid.  $[\alpha]_D^{25} = -53.7$  (*c* 1.2, CHCl<sub>3</sub>). The ee was determined by HPLC with a Daicel Chiralpak AD-H column (5% isopropanol in hexanes, 1 mL/min, 254 nm, major *t<sub>r</sub>* = 11.90 min, minor *t<sub>r</sub>* = 14.18 min). <sup>1</sup>H NMR (500 MHz, CDCl<sub>3</sub>) δ: .766 (d, *J* = 8.0 Hz, 2H), 7.60 (d, *J* = 8.5 Hz, 2H), 5.77-5.76 (m, 3H), 5.58 (d, *J* = 9.5 Hz 1H), 5.32 (d, *J* = 6.5 Hz 2H), 2.43-2.35 (m, 3H), 2.00 (m, 2H), 1.82-1.73 (m, 2H), 1.68-1.61 (m, 1H), 1.37-1.31 (m, 1H). <sup>13</sup>C{<sup>1</sup>H} NMR (125 MHz, CDCl<sub>3</sub>) δ: 232.7, 140.6, 131.0 (q, *J* = 32.5 Hz), 129.7, 129.0, 127.6, 126.0 (q, *J* = 3.8 Hz), 124.1 (q, *J* = 271.3 Hz), 111.6, 105.9, 93.62, 93.61, 92.80, 92.78, 41.9, 37.8, 28.9, 25.4, 21.2. IR (neat): 2931, 2861, 1966, 1889 (strong CO stretch), 1618, 1326, 1169, 1127, 1071, 1020, 1008, 840, 662, 622, 534. HRMS: calcd for C<sub>23</sub>H<sub>19</sub>O<sub>3</sub>ClF<sub>3</sub>Cr [M+Cl]<sup>+</sup> 487.0380, found 487.0404.

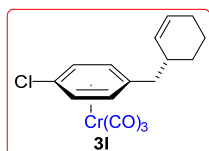

**(-)-(η<sup>6</sup>-(2-Cyclohexen-1-ylmethyl)-4-chloro-benzene)Cr(CO)<sub>3</sub> (3l):** The reaction was performed following General Procedure A with **1h** (26.3 mg, 0.1 mmol), LiN(SiMe<sub>3</sub>)<sub>2</sub> (50.2 mg, 0.3 mmol) and **2a** (40 μL, 0.2 mmol) for 2.5h.

The crude material was purified by flash chromatography on silica gel (eluted with EtOAc:hexanes = 1:20) to give the product (24.0 mg, 70% yield, 94% ee) as a yellow solid.  $[\alpha]_{\text{D}}^{25} = -74.4$  ( $c$  1.4,  $\text{CHCl}_3$ ). The ee was determined after conversion of **3l** to **3b** (using published method<sup>[7]</sup>) by HPLC using a Daicel Chiralpak AD-H column (5% isopropanol in hexanes, 0.8 mL/min, 254 nm, major  $t_{\text{r}} = 9.81$  min, minor  $t_{\text{r}} = 12.91$  min). The NMR spectral data of **3l** match the previously published data.<sup>[4]</sup>

### 5. Procedure and Characterization for the Two-step One-pot Allylic Substitution/Demetallation.

**General Procedure B:** The reaction was conducted according to General Procedure A described above. After 12 h, the reaction was quenched with 3 drops of water, diluted with 20 mL of diethyl ether, and the solution was exposed to sunlight by placing it on the windowsill and stirring for 24 h at room temperature. The reaction mixture was then filtered through a pad of  $\text{MgSO}_4$  and silica, concentrated *in vacuo*. The crude material was purified by flash chromatography on silica gel.

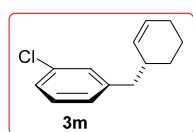

**(-)-(2-Cyclohexen-1-ylmethyl)-3-chlorobenzene (3m):** The reaction was performed following General Procedure B with **1i** (26.3 mg, 0.1 mmol),  $\text{LiN}(\text{SiMe}_3)_2$  (50.2 mg, 0.30 mmol) and **2a** (40  $\mu\text{L}$ , 0.2 mmol) for 2.5h. The crude material was purified by flash chromatography on silica gel (eluted with EtOAc:hexanes = 1:30) to give the product (15.7 mg, 76% yield, 91% ee) as a colorless oil.  $[\alpha]_{\text{D}}^{25} = -28.9$  ( $c$  0.6,  $\text{CHCl}_3$ ). The ee was determined by HPLC with a Daicel Chiralcel OJ-H column (0.5% isopropanol in hexanes, 0.4 mL/min, 230 nm, minor  $t_{\text{r}} = 13.55$  min, major  $t_{\text{r}} = 14.45$  min).  $^1\text{H}$  NMR (500 MHz,  $\text{CDCl}_3$ )  $\delta$ : 7.22-7.17 (m, 3H), 7.05 (d,  $J = 7.0$  Hz, 1H), 5.71-5.68 (m, 1H), 5.55-5.52 (m, 1H), 2.61 (dd,  $J = 15.0$  Hz, 10.0 Hz, 1H), 2.52 (dd,  $J = 15.0$  Hz, 10.0 Hz, 1H), 2.38-2.34 (m, 1H), 2.00-1.96 (m, 2H), 1.73-1.68 (m, 2H), 1.53-1.48 (m, 1H), 1.28-1.20 (m, 1H).  $^{13}\text{C}\{^1\text{H}\}$  NMR (125 MHz,  $\text{CDCl}_3$ )  $\delta$ : 143.2, 134.2, 131.0, 129.6, 129.4, 127.96, 127.56, 126.2, 42.6, 37.2, 29.0, 25.5, 21.4. IR (neat): 2925, 2856, 1597, 1573, 1475, 1428, 1384, 1079, 871, 773, 723, 699. HRMS: calcd for  $\text{C}_{13}\text{H}_{15}\text{Cl}$   $[\text{M}]^+$  206.0862, found 206.0864.

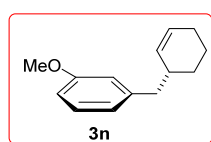

**(-)-(2-Cyclohexen-1-ylmethyl)-3-methoxybenzene (3n):** The reaction was performed following General Procedure B with **1j** (25.8 mg, 0.1 mmol),  $\text{LiN}(\text{SiMe}_3)_2$  (50.2 mg, 0.30 mmol) and **2a** (40  $\mu\text{L}$ , 0.2 mmol). The crude material was purified by flash chromatography on silica gel (eluted with EtOAc:hexanes = 1:30) to give the product (14.5 mg, 72% yield, 91% ee) as a colorless oil.  $[\alpha]_{\text{D}}^{25} = -37.8$  ( $c$  0.9,  $\text{CHCl}_3$ ). The ee was determined by HPLC with a Daicel Chiralcel OJ-H column (1% isopropanol in hexanes, 0.5 mL/min, 230 nm, minor  $t_{\text{r}} = 16.73$  min, major  $t_{\text{r}} = 19.50$  min). The NMR spectral data match the previously published data.<sup>[4]</sup>

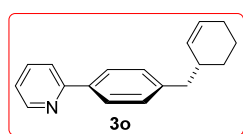

**(-)-(2-Cyclohexen-1-ylmethyl)-4-(2-pyridyl)benzene (3o):** The reaction was performed following General Procedure B with **1c** (30.5 mg, 0.1 mmol),  $\text{LiN}(\text{SiMe}_3)_2$  (50.2 mg, 0.30 mmol) and **2a** (40  $\mu\text{L}$ , 0.2 mmol). The crude material was purified by flash chromatography on silica gel (eluted with EtOAc:hexanes = 1:10) to give the product (18.4 mg, 74% yield, 94% ee) as a white solid. Mp 59–60  $^{\circ}\text{C}$   $[\alpha]_{\text{D}}^{25} = -35.3$  ( $c$  0.8,  $\text{CHCl}_3$ ). The ee was determined by HPLC with a Daicel Chiralpak OD-H column (5% isopropanol in hexanes, 1 mL/min, 230 nm, minor  $t_{\text{r}} = 11.75$  min, major  $t_{\text{r}} = 14.70$  min).  $^1\text{H}$  NMR (500 MHz,  $\text{CDCl}_3$ )  $\delta$ : 8.68 (d,  $J = 5.0$  Hz, 1H), 7.91 (d,  $J = 8.0$  Hz, 2H), 7.73-7.71 (m, 2H), 7.29-7.26 (m, 2H), 7.21-7.18 (m, 1H), 5.72-5.69 (m, 1H), 5.60-5.58 (m, 1H), 2.69 (dd,  $J = 13.5$  Hz, 7.5



Hz, 1H), 2.60 (dd,  $J = 13.5$  Hz, 8.0 Hz, 1H), 2.42-2.40 (m, 1H), 1.99-1.98 (m, 2H), 1.75-1.72 (m, 2H), 1.53-1.51 (m, 1H), 1.31-1.27 (m, 1H).  $^{13}\text{C}\{^1\text{H}\}$  NMR (125 MHz,  $\text{CDCl}_3$ )  $\delta$ : 157.7, 149.8, 142.2, 137.2, 136.9, 131.4, 129.8, 127.7, 126.9, 122.0, 120.5, 42.7, 37.4, 29.1, 25.6, 21.5. IR (neat): 3014, 2924, 2854, 1586, 1466, 1435, 1185, 1152, 1016, 859, 773, 741, 720, 670. HRMS: calcd for  $\text{C}_{18}\text{H}_{20}\text{N}$   $[\text{M}+\text{H}]^+$  250.1596, found 250.1596.

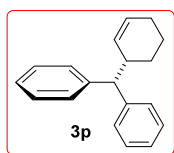

**(-)-3-(Diphenylmethyl)-1-cyclohexene (3p):** The reaction was performed following General Procedure B with **1k** (30.4 mg, 0.1 mmol),  $\text{LiN}(\text{SiMe}_3)_2$  (50.2 mg, 0.30 mmol) and **2a** (40  $\mu\text{L}$ , 0.2 mmol). The crude material was purified by flash chromatography on silica gel (eluted with EtOAc:hexanes = 1:30) to give the product (24.3 mg, 98% yield, 92% ee) as a colorless oil.  $[\alpha]_{\text{D}}^{25} = -10.4$  ( $c$  1.9,  $\text{CHCl}_3$ ). The ee was determined by HPLC with a Daicel Chiralcel OJ-H column (3% isopropanol in hexanes, 0.8 mL/min, 230 nm, minor  $t_{\text{r}} = 21.14$  min, major  $t_{\text{r}} = 24.66$  min). The NMR spectral data match the previously published data.

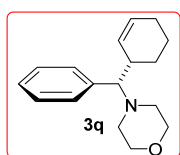

**(-)-4-(Cyclohex-2-en-1-yl(phenyl)methyl)morpholine (3q):** The reaction was performed following General Procedure B with **1l** (31.3 mg, 0.1 mmol),  $\text{LiN}(\text{SiMe}_3)_2$  (50.2 mg, 0.30 mmol) and **2a** (40  $\mu\text{L}$ , 0.2 mmol). The crude material was purified by flash chromatography on silica gel (eluted with EtOAc:hexanes = 1:30) to give the product (24.7 mg, 96% yield, 83% ee for major product, 93% ee for minor product) as a colorless oil.  $[\alpha]_{\text{D}}^{25} = -28.6$  ( $c$  2.1,  $\text{CHCl}_3$ ). The ee was determined by HPLC with a Daicel Chiralpak OD-H column (2% isopropanol in hexanes, 0.6 mL/min, 230 nm, for major product major  $t_{\text{r}} = 12.23$  min, minor  $t_{\text{r}} = 15.49$  min, for minor product minor  $t_{\text{r}} = 10.68$  min, major  $t_{\text{r}} = 13.36$  min).  $^1\text{H}$  NMR (500 MHz,  $\text{CDCl}_3$ )  $\delta$ : 7.34-7.31 (m, 2H), 7.29-7.25 (m, 1H), 7.18 (d,  $J = 7.0$  Hz, 2H), 7.12 (d,  $J = 7.0$  Hz, 1H), 6.15 (d,  $J = 10.0$  Hz, major diastereomer), 5.79-5.77 (m, major diastereomer), 5.67-5.64 (m, minor diastereomer), 5.53 (d,  $J = 10.5$  Hz, minor diastereomer), 3.71-3.65 (m, 4H), 3.20 (d,  $J = 10.0$  Hz, major diastereomer), 3.15 (d,  $J = 8.5$  Hz, minor diastereomer), 2.83-2.75 (m, 1H), 2.48-2.32 (m, 4H), 1.98-1.89 (m), 1.70-1.63 (m, 1H), 1.51-1.47 (m), 1.33-1.26 (m, minor diastereomer), 1.04-0.96 (m, major diastereomer).  $^{13}\text{C}\{^1\text{H}\}$  NMR (125 MHz,  $\text{CDCl}_3$ )  $\delta$ : 138.1, 136.6, 129.9, 129.5, 129.3, 128.8, 128.5, 127.96, 127.92, 127.23, 127.21, 74.9, 74.5, 67.6, 67.5, 50.8, 50.0, 35.7, 34.8, 27.2, 26.9, 25.8, 25.7, 22.0, 21.8. IR (neat): 3025, 2951, 2925, 2890, 2852, 1492, 1451, 1287, 1119, 1071, 1003, 901, 870, 754, 724, 705, 550. HRMS: calcd for  $\text{C}_{17}\text{H}_{24}\text{NO}$   $[\text{M}+\text{H}]^+$  258.1858, found 258.1860.

## 6. Procedure and Characterization for the Pd-catalyzed Asymmetric Allylic Alkylation of acyclic electrophiles

**General Procedure C:** To an oven-dried microwave vial equipped with a stir bar was added  $\text{Pd}(\text{COD})\text{Cl}_2$  (1.43 mg, 0.005 mmol) and (*R*)-CTH-JAFAPHOS (5.61 mg, 0.0075 mmol) under nitrogen atmosphere inside a glove box at room temperature. Next, 2.1 mL of dry 2-MeTHF and 0.9 mL of dry toluene were added sequentially via syringe. After the catalyst/ligand solution was stirred for 30 min at 24 °C inside the glove box,  $(\eta^6\text{-arene-CH}_2\text{Z})\text{Cr}(\text{CO})_3$  (0.1 mmol, 1.0 equiv) was added to the reaction vial followed by  $\text{LiN}(\text{SiMe}_3)_2$  (67.2 mg, 0.4 mmol, 4 equiv). The microwave vial was sealed and removed from the glove box. The microwave vial was cooled to -30 °C, PMDTA (33  $\mu\text{L}$ , 0.15 mmol, 1.5 equiv) was added via microsyringe, and the resulting yellow solution stirred for additional 5 min. A



solution of the allylic electrophile in 2-MeTHF/toluene (v/v = 0.7 mL/ 0.3 mL, 0.3 mmol, 3 equiv) was added via syringe over 10 min under nitrogen atmosphere and the reaction mixture was stirred under nitrogen atmosphere for 12 h at  $-30\text{ }^{\circ}\text{C}$ . Next, 5 drops water was added via syringe, and then the vial opened to air. The reaction mixture was passed through a short pad of silica gel and rinsed with 5 mL 10:1 ethyl acetate: methanol. The solvent was removed by rotary evaporator. The residue was purified by flash chromatography.

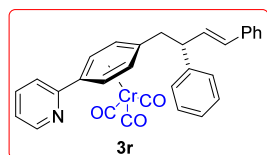

**(E)-(η<sup>6</sup>-(2,4-diphenylbut-3-en-1-yl)-4-(2-pyridyl)-benzene)Cr(CO)<sub>3</sub> (3r):**

The reaction was performed following General Procedure C with **1c** (30.5 mg, 0.1 mmol), LiN(SiMe<sub>3</sub>)<sub>2</sub> (67.0 mg, 0.40 mmol) and **2c** (96.0 mg, 0.3 mmol). The crude material was purified by flash chromatography on silica gel (eluted with EtOAc:hexanes = 1:10) to give the product (35.8 mg, 72% yield, >99% ee) as a yellow solid.  $[\alpha]_{\text{D}}^{25} = +5.0$  (*c* 1.4, CHCl<sub>3</sub>). The ee was determined by SFC with a Daicel Chiralpak AD-H column (30% methanol in CO<sub>2</sub>, 4 mL/min, 270 nm, minor *t<sub>r</sub>* = 3.00 min, major *t<sub>r</sub>* = 3.71 min). <sup>1</sup>H NMR (500 MHz, CDCl<sub>3</sub>) δ: 8.58-8.57 (m, 1H), 7.71-7.69 (m, 1H), 7.49 (d, *J* = 7.5 Hz, 1H), 7.34-7.28 (m, 6H), 7.24-7.20 (m, 5H), 6.42 (s, 1H), 6.41 (s, 1H), 6.19 (dd, *J* = 7.0 Hz, 1.0 Hz, 1H), 6.09 (dd, *J* = 6.5 Hz, 1.0 Hz, 1H), 5.33 (dd, *J* = 6.5 Hz, 1.5 Hz, 1H), 5.00 (dd, *J* = 7.0 Hz, 1.5 Hz, 1H), 3.70-3.66 (m, 1H), 2.94 (dd, *J* = 13.5 Hz, 7.0 Hz, 1H), 2.86 (dd, *J* = 14.0 Hz, 8.0 Hz, 1H). <sup>13</sup>C{<sup>1</sup>H} NMR (125 MHz, CDCl<sub>3</sub>) δ: 232.9, 153.7, 149.7, 142.4, 137.1, 131.9, 131.1, 129.0, 128.8, 128.1, 127.8, 127.2, 126.5, 123.5, 120.1, 110.8, 103.7, 93.09, 93.07, 92.9, 92.8, 51.7, 42.2. IR (neat): 3059, 3027, 1961, 1881 (strong CO stretch), 1587, 1493, 1461, 1432, 960, 786, 738, 699, 666, 627, 532. HRMS: calcd for C<sub>30</sub>H<sub>24</sub>NO<sub>3</sub>Cr [M+H]<sup>+</sup> 498.1161, found 498.1165.

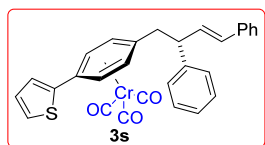

**(E)-(η<sup>6</sup>-(2,4-diphenylbut-3-en-1-yl)-(2-thiophenyl)-benzene)Cr(CO)<sub>3</sub> (3s):**

The reaction was performed following General Procedure C with **1d** (31.0 mg, 0.1 mmol), LiN(SiMe<sub>3</sub>)<sub>2</sub> (67.0 mg, 0.40 mmol) and **2c** (96.0 mg, 0.3 mmol). The crude material was purified by flash chromatography on silica gel (eluted with EtOAc:hexanes = 1:10) to give the product (32.7 mg, 65% yield, 94% ee) as a yellow solid.  $[\alpha]_{\text{D}}^{25} = +3.0$  (*c* 0.7, CHCl<sub>3</sub>). The ee was determined by HPLC with a Daicel Chiralpak AD-H column (10% isopropanol in hexanes, 1 mL/min, 254 nm, minor *t<sub>r</sub>* = 11.03 min, major *t<sub>r</sub>* = 11.91 min). <sup>1</sup>H NMR (500 MHz, CDCl<sub>3</sub>) δ: 7.28-7.19 (m, 12H), 7.00 (dd, *J* = 5.0 Hz, 3.5 Hz, 1H), 6.41 (s, 1H), 6.40 (d, *J* = 2.0 Hz, 1H), 5.71 (dd, *J* = 6.5 Hz, 1.5 Hz, 1H), 5.60 (dd, *J* = 7.0 Hz, 1.0 Hz, 1H), 5.29 (dd, *J* = 7.0 Hz, 1.5 Hz, 1H), 4.98 (dd, *J* = 6.5 Hz, 1.5 Hz, 1H), 3.66-3.65 (m, 1H), 2.88 (dd, *J* = 14.0 Hz, 7.0 Hz, 1H), 2.81 (dd, *J* = 13.5 Hz, 7.5 Hz, 1H). <sup>13</sup>C{<sup>1</sup>H} NMR (125 MHz, CDCl<sub>3</sub>) δ: 232.8, 142.3, 139.6, 136.9, 131.7, 130.9, 128.9, 128.6, 127.8, 128.6, 127.0, 126.3, 126.2, 124.7, 109.0, 101.8, 93.17, 93.15, 91.2, 91.1, 51.5, 41.9. IR (neat): 3082, 3060, 2927, 3027, 1961, 1885 (strong CO stretch), 1599, 1494, 1452, 1259, 967, 909, 852, 745, 735, 700, 666, 624, 532. HRMS: calcd for C<sub>29</sub>H<sub>22</sub>O<sub>3</sub>SCr [M]<sup>+</sup> 502.0695, found 502.0693.

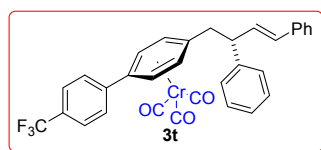

**(E)-(η<sup>6</sup>-(2,4-diphenylbut-3-en-1-yl)-(2-thiophenyl)-benzene)Cr(CO)<sub>3</sub> (3t):**

The reaction was performed following General Procedure C with **1g** (37.2 mg, 0.1 mmol), LiN(SiMe<sub>3</sub>)<sub>2</sub> (67.0 mg, 0.40 mmol) **2c** (96.0 mg, 0.3 mmol) and 10 mol% Pd for 4h. The crude material was purified by flash chromatography on silica gel (eluted with EtOAc:hexanes = 1:10) to give the product

(33.9 mg, 60% yield, 92% ee) as a yellow solid.  $[\alpha]_{\text{D}}^{25} = +3.9$  ( $c$  0.7,  $\text{CHCl}_3$ ). The ee was determined by HPLC with a Daicel Chiralpak AD-H column (10% isopropanol in hexanes, 1 mL/min, 254 nm, minor  $t_{\text{r}} = 13.91$  min, major  $t_{\text{r}} = 15.66$  min).  $^1\text{H}$  NMR (500 MHz,  $\text{CDCl}_3$ )  $\delta$ : 7.63 (d,  $J = 8.5$  Hz, 2H), 7.55 (d,  $J = 8.0$  Hz, 2H), 7.34-7.21 (m, 10H), 6.41 (s, 1H), 6.40 (d,  $J = 2.5$  Hz, 1H), 5.70 (dd,  $J = 7.0$  Hz, 2.0 Hz 1H), 5.60 (dd,  $J = 6.5$  Hz, 1.5 Hz 1H), 5.30 (dd,  $J = 6.5$  Hz, 1.5 Hz 1H), 5.00 (dd,  $J = 6.5$  Hz, 1.5 Hz 1H), 3.68-3.67 (m, 1H), 2.92 (dd,  $J = 14.0$  Hz, 7.0 Hz, 1H), 2.86 (dd,  $J = 13.5$  Hz, 8.0 Hz, 1H).  $^{13}\text{C}\{^1\text{H}\}$  232.6, 142.4, 140.4, 137.1, 131.9, 131.2, 131.0 (q,  $J = 32.5$  Hz), 129.1, 128.8, 128.0, 127.8, 127.5, 127.3, 126.5, 126.0 (q,  $J = 3.8$  Hz), 124.0 (q,  $J = 263.8$  Hz), 110.4, 105.8, 93.21, 93.15, 93.04, 93.00, 51.7, 42.1. IR (neat): 3583, 2923, 1963, 1883, (strong CO stretch) 1616, 1493, 1451, 1325, 1167, 1124, 1070, 1007, 966, 840, 746, 695. HRMS: calcd for  $\text{C}_{32}\text{H}_{23}\text{O}_3\text{F}_3\text{Cr}$   $[\text{M}]^+$  564.1004, found 564.1001.

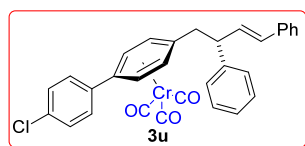

**(E)-(η<sup>6</sup>-(2,4-diphenylbut-3-en-1-yl)-(p-chlorophenyl)-benzene)Cr(CO)<sub>3</sub> (3u)**: The reaction was performed following General Procedure C with **1f** (33.9 mg, 0.1 mmol),  $\text{LiN}(\text{SiMe}_3)_2$  (67.0 mg, 0.40 mmol) **2c** (96.0 mg, 0.3 mmol) and 10 mol% Pd. The crude material was purified

by flash chromatography on silica gel (eluted with EtOAc:hexanes = 1:10) to give the product (32.9 mg, 62% yield, 94% ee) as a yellow solid.  $[\alpha]_{\text{D}}^{25} = +2.8$  ( $c$  0.7,  $\text{CHCl}_3$ ). The ee was determined by SFC with a Daicel Chiralpak AD-H column (40% methanol in  $\text{CO}_2$ , 4 mL/min, 254 nm, minor  $t_{\text{r}} = 5.45$  min, major  $t_{\text{r}} = 7.00$  min).  $^1\text{H}$  NMR (500 MHz,  $\text{CDCl}_3$ )  $\delta$ : 7.37-7.29 (m, 10H), 7.24-7.21 (m, 4H), 6.41 (s, 1H), 6.40 (d,  $J = 2.0$  Hz, 1H), 5.65 (dd,  $J = 6.5$  Hz, 1.5 Hz, 1H), 5.55 (dd,  $J = 6.5$  Hz, 1.5 Hz, 1H), 5.30 (dd,  $J = 5.0$  Hz, 2.0 Hz, 1H), 5.00 (d,  $J = 7.0$  Hz, 1.5 Hz, 1H), 3.68-3.64 (m, 1H), 2.91 (dd,  $J = 14.0$  Hz, 7.5 Hz, 1H), 2.84 (dd,  $J = 14.0$  Hz, 8.0 Hz, 1H).  $^{13}\text{C}\{^1\text{H}\}$  NMR (125 MHz,  $\text{CDCl}_3$ )  $\delta$ : 232.7, 142.3, 136.9, 134.9, 131.7, 130.9, 129.0, 128.8, 128.6, 128.2, 127.8, 127.6, 127.1, 126.3, 51.5, 41.8. IR (neat): 3585.2, 2923.6, 1964, 1885 (strong CO stretch), 1616, 1598, 1451, 1325, 1025, 1007, 966, 840, 746, 695. HRMS: calcd for  $\text{C}_{31}\text{H}_{23}\text{O}_3\text{ClCr}$   $[\text{M}]^+$  530.0741, found 530.0743.

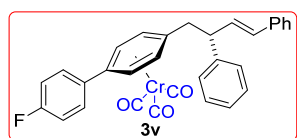

**(E)-(η<sup>6</sup>-(2,4-diphenylbut-3-en-1-yl)-(p-fluorophenyl)-benzene)Cr(CO)<sub>3</sub> (3v)**: The reaction was performed following General Procedure C with **1m** (32.2 mg, 0.1 mmol),  $\text{LiN}(\text{SiMe}_3)_2$  (67.0 mg, 0.40 mmol) **2c** (96.0 mg, 0.3 mmol) and 10 mol% Pd. The crude material was purified by

flash chromatography on silica gel (eluted with EtOAc:hexanes = 1:10) to give the product (36.5 mg, 71% yield, >99% ee) as a yellow solid.  $[\alpha]_{\text{D}}^{25} = +6.1$  ( $c$  0.7,  $\text{CHCl}_3$ ). The ee was determined by HPLC with a Daicel Chiralpak IB column (5% isopropanol in hexanes, 0.4 mL/min, 254 nm, minor  $t_{\text{r}} = 31.84$  min, major  $t_{\text{r}} = 34.22$  min).  $^1\text{H}$  NMR (500 MHz,  $\text{CDCl}_3$ )  $\delta$ : 7.43-7.40 (m, 2H), 7.35-7.28 (m, 6H), 7.20-7.20 (m, 4H), 7.08-7.05 (m, 2H), 6.41 (s, 1H), 6.40 (d,  $J = 1.5$  Hz, 1H), 5.64 (dd,  $J = 6.5$  Hz, 1.5 Hz, 1H), 5.54 (dd,  $J = 6.5$  Hz, 1.5 Hz, 1H), 5.31 (dd,  $J = 5.0$  Hz, 2.0 Hz, 1H), 5.01 (d,  $J = 7.0$  Hz, 1.5 Hz, 1H), 3.68-3.65 (m, 1H), 2.90 (dd,  $J = 13.5$  Hz, 7.0 Hz, 1H), 2.84 (dd,  $J = 13.5$  Hz, 7.5 Hz, 1H).  $^{13}\text{C}\{^1\text{H}\}$  NMR (125 MHz,  $\text{CDCl}_3$ )  $\delta$ : 233.1, 163.3 ( $J = 13.5$  Hz), 142.5, 137.1, 132.7 ( $J = 3.8$  Hz), 132.0, 131.2, 129.1, 129.0 ( $J = 8.8$  Hz), 128.9, 128.1, 127.8, 127.3, 126.5, 116.1 ( $J = 21.3$  Hz), 109.8, 107.7, 93.6, 93.5, 92.93, 92.87, 51.7, 42.0. IR (neat): 3082, 3027, 1960, 1878 (strong CO stretch), 1604, 1515, 1493, 1471, 1451, 1235, 1158, 1104, 967, 835, 746, 700, 665, 625, 534. HRMS: calcd for  $\text{C}_{31}\text{H}_{23}\text{O}_3\text{FCr}$   $[\text{M}]^+$  514.1016, found 514.1036.

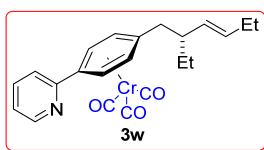

**(E)-(η<sup>6</sup>-(2-ethylhex-3-en-1-yl)-4-(2-pyridyl)-benzene)Cr(CO)<sub>3</sub> (3w):** The reaction was performed following General Procedure C with **1c** (30.5 mg, 0.1 mmol), LiN(SiMe<sub>3</sub>)<sub>2</sub> (67.0 mg, 0.4 mmol) and **2d** (64.2 mg, 0.3 mmol). The crude material was purified by flash chromatography on silica gel (eluted with EtOAc:hexanes = 1:10) to give the product (25.3 mg, 63% yield, 64% ee) as a yellow solid.  $[\alpha]_D^{25} = +5.2$  (*c* 0.5, CHCl<sub>3</sub>). The ee was determined by HPLC with a Daicel Chiralpak IB column (1% isopropanol in hexanes, 1.0 mL/min, 230 nm, minor *t<sub>r</sub>* = 13.86 min, major *t<sub>r</sub>* = 15.74 min). <sup>1</sup>H NMR (500 MHz, CDCl<sub>3</sub>) δ: 8.59 (d, *J* = 4.5 Hz, 1H), 7.74-7.71 (m, 1H), 7.54 (d, *J* = 8.0 Hz, 1H), 7.25-7.23 (m, 1H), 6.23 (d, *J* = 6.5 Hz, 1H), 6.20 (d, *J* = 6.5 Hz, 1H), 5.36-5.33 (m, 1H), 5.31 (d, *J* = 7.0 Hz, 1H), 5.26 (d, *J* = 6.5 Hz, 1H), 5.15-5.10 (m, 1H), 2.46 (dd, *J* = 13.5 Hz, 5.5 Hz, 1H), 2.32 (dd, *J* = 13.5 Hz, 8.5 Hz, 1H), 2.09-2.05 (m, 1H), 2.01-1.96 (m, 2H), 1.53-1.48 (m, 1H), 1.34-1.28 (m, 1H), 0.94 (t, *J* = 7.5 Hz, 3H), 0.89 (t, *J* = 7.0 Hz, 3H). <sup>13</sup>C{<sup>1</sup>H} NMR (125 MHz, CDCl<sub>3</sub>) δ: 233.1, 153.9, 149.7, 137.1, 134.4, 131.3, 123.4, 120.1, 112.4, 103.7, 93.6, 93.2, 92.9, 47.3, 41.5, 28.1, 25.8, 14.2, 11.9. IR (neat): 2962, 2930, 1964, 1886 (strong CO stretch), 1587, 1571, 1462, 1432, 970, 785, 741, 666, 624, 532. HRMS: calcd for C<sub>22</sub>H<sub>24</sub>NO<sub>3</sub>Cr [M]<sup>+</sup> 402.1161, found 402.1178.

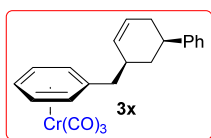

**(-)-(η<sup>6</sup>-(5-phenyl-2-cyclohexen-1-yl)methyl)-benzene)Cr(CO)<sub>3</sub> (3x):** The reaction was performed following General Procedure A with **1a** (28.2 mg, 0.1 mmol), LiN(SiMe<sub>3</sub>)<sub>2</sub> (50.2 mg, 0.3 mmol) and **2d** (54.8 mg, 0.2 mmol). The crude material was purified by flash chromatography on silica gel (eluted with EtOAc:hexanes = 1:10) to give the product (23.1 mg, 60% yield, 67% ee) as a yellow solid.  $[\alpha]_D^{25} = -75.7$  (*c* 0.6, CHCl<sub>3</sub>). The ee was determined by SFC with a Daicel Chiralpak IA column (10% methanol in CO<sub>2</sub>, 4 mL/min, 270 nm, minor *t<sub>r</sub>* = 5.54 min, major *t<sub>r</sub>* = 6.18 min). The NMR spectral data match the previously published data.

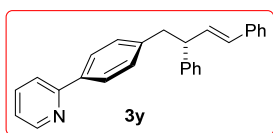

**(E)-2-(4-(2,4-diphenylbut-3-en-1-yl)phenyl)pyridine (3y):** The AAA reaction was performed as in General Procedure C and exposure to sunlight was carried out as in General Procedure B with **1c** (30.5 mg, 0.1 mmol), LiN(SiMe<sub>3</sub>)<sub>2</sub> (67.0 mg, 0.40 mmol) and **2c** (96.0 mg, 0.3 mmol). The crude material was purified by flash chromatography on silica gel (eluted with EtOAc:hexanes = 1:10) to give the product (25.3 mg, 70% yield, >99% ee) as a white solid. Mp 98–100 °C;  $[\alpha]_D^{25} = +19.8$  (*c* 0.5, CHCl<sub>3</sub>). The ee was determined by SFC with a Daicel Chiralpak AD-H column (30% methanol in CO<sub>2</sub>, 4 mL/min, 270 nm, minor *t<sub>r</sub>* = 4.23 min, major *t<sub>r</sub>* = 5.26 min). <sup>1</sup>H NMR (500 MHz, CDCl<sub>3</sub>) δ: 8.65 (d, *J* = 4.5 Hz, 1H), 7.85 (d, *J* = 8.0 Hz, 2H), 7.69-7.65 (m, 2H), 7.31-7.16 (m, 12H), 6.43 (dd, *J* = 15.5 Hz, 7.5 Hz, 1H), 6.32 (d, *J* = 15.5 Hz, 1H), 3.79-3.75 (m, 1H), 3.19 (dd, *J* = 13.5 Hz, 7.5 Hz, 1H), 3.14 (dd, *J* = 13.5 Hz, 7.5 Hz, 1H). <sup>13</sup>C{<sup>1</sup>H} NMR (125 MHz, CDCl<sub>3</sub>) δ: 157.6, 149.8, 143.8, 141.1, 137.6, 137.3, 136.8, 133.3, 130.3, 130.0, 128.69, 128.65, 128.1, 127.3, 126.8, 126.6, 126.4, 122.0, 120.5, 51.0, 42.7. IR (neat): 3058, 3026, 2924, 2855, 1587, 1577, 1561, 1494, 1467, 1451, 1435, 1153, 1016, 988, 965, 847, 777. 743, 699. HRMS: calcd for C<sub>27</sub>H<sub>24</sub>N [M+H]<sup>+</sup> 362.1909, found 362.1910.

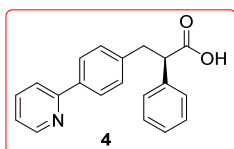

**(-)-2-phenyl-3-(4-(pyridin-2-yl)phenyl)propanoic acid (4):** To a stirred solution of **3y** (10.0 mg, 0.027 mmol) and potassium carbonate (1.9 mg, 0.014

mmol) in *t*-butyl alcohol (1.6 mL) and water (0.3 mL) was added dropwise an aqueous solution (1.4 mL) of sodium metaperiodate (30.0 mg, 0.14 mmol), potassium permanganate (1.2 mg, 0.007 mmol), and potassium carbonate (1.9 mg, 0.014 mmol) at 0 °C. The resulting mixture was stirred at the same temperature for 30 min, then warmed to room temperature and further stirred for 24 h. The mixture was evaporated to remove *t*-butyl alcohol. The resulting aqueous solution was extracted with dichloromethane (20 mL × 3). The combined organic layer was dried over anhydrous Na<sub>2</sub>SO<sub>4</sub>, and concentrated to give a residue, which was purified by preparative (SiO<sub>2</sub>: ethyl acetate: DCM, 1:3) to furnish **4** (5.0 mg, 61% yield, >99% ee) as a colorless oil.  $[\alpha]_D^{25} = -160.0$  (*c* 0.3, CHCl<sub>3</sub>). The ee was determined by SFC with a Daicel Chiralpak IA column (30% methanol in CO<sub>2</sub>, 4 mL/min, 254 nm, major *t<sub>r</sub>* = 2.56 min, minor *t<sub>r</sub>* = 3.42 min. <sup>1</sup>H NMR (500 MHz, CDCl<sub>3</sub>) δ: 8.64 (d, *J* = 4.0 Hz, 1H), 7.80 (d, *J* = 8.5 Hz, 2H), 7.74 (td, *J* = 7.5 Hz, 2.0 Hz, 1H), 7.66 (d, *J* = 8.0 Hz, 1H), 7.40-7.36 (m, 2H), 7.34-7.31 (m, 2H), 7.28-7.26 (m, 3H), 7.23-7.20 (m, 1H), 3.93 (dd, *J* = 9.5 Hz, 6.5 Hz, 1H), 3.52 (dd, *J* = 13.5 Hz, 9.0 Hz, 1H), 3.07 (dd, *J* = 14.0 Hz, 6.5 Hz, 1H). <sup>13</sup>C{<sup>1</sup>H} NMR (125 MHz, CDCl<sub>3</sub>) δ: 177.2, 157.4, 149.3, 140.6, 138.9, 137.6, 137.1, 129.6, 128.9, 128.3, 127.7, 127.4, 122.4, 121.3, 53.6, 39.6. IR (neat): 3061, 3029, 2926, 2531, 1449, 1716, 1598, 1561, 1495, 1469, 1436, 1221, 1179, 1157, 911, 848, 778, 730, 699. HRMS: calcd for C<sub>20</sub>H<sub>18</sub>NO<sub>2</sub> [M+H]<sup>+</sup> 304.1338, found 304.1334.

## 7. List of predosed chiral ligands screened for catalyst identification

### 7.1 143 chiral ligands screening with cyclic electrophile

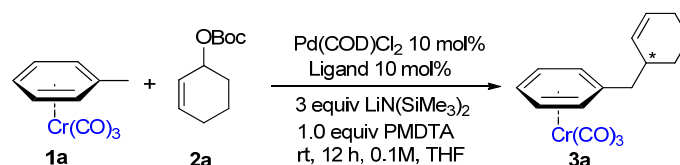

#### General Experimental for the ligand screening:

Set up:

Experiments were set up inside a glovebox under a nitrogen atmosphere. Two 96-well aluminum blocks containing 1 mL glass vials were predosed with Pd(COD)Cl<sub>2</sub> (1 μmol) and the chiral phosphine ligands (2 μmol for monodentate ligands and 1 μmol for bidentate ligands) in THF. The solvent was removed to dryness using a GeneVac and 3 equiv. LiN(SiMe<sub>3</sub>)<sub>2</sub> (30 μmol) in THF was added to the ligand/catalyst mixture. The solvent was removed on the GeneVac and a parylene stir bar was then added to each reaction vial. 1 Equiv ( $\eta^6$ -C<sub>6</sub>H<sub>5</sub>CH<sub>3</sub>)Cr(CO)<sub>3</sub> (**1a**, 10 μmol), 2 equiv *tert*-butyl cyclohex-2-enyl carbonate (**2a**, 20 μmol), 1 equiv PMDTA (pentamethyldiethylenetriamine, 10 μmol) additive, and biphenyl (1 μmol/reaction) (used as an internal standard) were then dosed together into each reaction vial as a solution in THF (100 μL, 0.1 M). The 96-well plates were then sealed and stirred for 18 h at RT.

Work up:

Upon opening the plate to air, 500 μL of acetonitrile/DMSO (3/1) was added into each vial. The plates were covered again and the vials stirred for 10 min. to ensure good homogenization. Into two separate 96-well LC blocks were added 700 μL of acetonitrile, followed by 25 μL of the diluted reaction mixtures. The LC blocks were then sealed with a silicon-rubber storage mat and mounted on an automated HPLC instrument for analysis.

| ligand                                                                                                                                                                           | Structure | Ee(%) | Conv. |
|----------------------------------------------------------------------------------------------------------------------------------------------------------------------------------|-----------|-------|-------|
| (2 <i>S</i> ,4 <i>S</i> )- <i>t</i> -Bu(-)-4-(Diphenylphosphino)-2-(diphenylphosphinomethyl)pyrrolidine carboxylate                                                              |           | -30   | 61    |
| (3 <i>S</i> ,4 <i>S</i> )-(-)-1-Benzyl-3,4-bis(diphenylphosphino)pyrrolidine. (( <i>S</i> )-Depyphos also called Deguphos or Catasium D)                                         |           | -6    | 19    |
| ( <i>S</i> )-1-Diphenylphosphino-2-[( <i>S</i> )-hydroxy-[2-(diphenylphosphino)phenyl]methyl]ferrocene. (SL-T021-2)                                                              |           | 1     | 62    |
| (1 <i>R</i> ,1' <i>R</i> )-1,1'-Bis[bis(4-methoxy-3,5-dimethylphenyl)phosphino]-2,2'-bis[( <i>R</i> )-(dimethylamino)phenylmethyl]ferrocene. (( <i>R</i> , <i>R</i> )-SL-M004-1) |           | -7    | 40    |
| ( <i>R</i> )-1-[( <i>R</i> )-2-(2'-Di-3,5-xyllylphosphinophenyl)-ferrocenyl]-ethyl-di-3,5-xyllylphosphine. (SL-W009-1)                                                           |           | -3    | 41    |
| ( <i>R</i> , <i>R</i> '')-2,2''-Bis(Diphenylphosphino)-1,1''-biferrocene. ( <i>R</i> , <i>R</i> )-BIFEP                                                                          |           | 22    | 60    |
| ( <i>S</i> )- <i>N</i> -Diphenylphosphino- <i>N</i> -methyl-[( <i>R</i> )-2-(diphenylphosphino)ferrocenyl]ethylamine. ( <i>S</i> )-Methyl BOPHOZ(TM)                             |           | 25    | 62    |
| (4 <i>S</i> ,5 <i>S</i> )-(+)-4,5-Bis(diphenylphosphinomethyl)-2,2-dimethyl-1,3-dioxolane. (( <i>S</i> , <i>S</i> )-DIOP)                                                        |           | -15   | 35    |

|                                                                                                                                                                             |                                                                                      |     |    |
|-----------------------------------------------------------------------------------------------------------------------------------------------------------------------------|--------------------------------------------------------------------------------------|-----|----|
| <p><math>(S_p, S'_p)</math>-1,1'-Bis[(<i>R</i>)-(dimethylamino)phenylmethyl]-2,2'-bis(diphenylphosphino)ferrocene. ((<i>S, S</i>)-SL-M001-1)</p>                            | 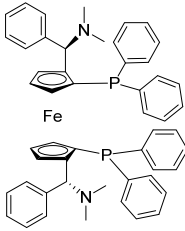   | -21 | 53 |
| <p><math>(S_p, S'_p)</math>-1,1'-Bis(dicyclohexylphosphino)-2,2'-bis[(<i>R</i>)-<math>\alpha</math>-(dimethylamino)benzyl]ferrocene. ((<i>S, S</i>)-SL-M002-1)</p>          |    | 6   | 31 |
| <p><math>(S_p, S'_p)</math>-1,1'-Bis[bis[3,5-bis(trifluoromethyl)phenyl]phosphino]-2,2'-bis[(<i>R</i>)-(dimethylamino)phenylmethyl]ferrocene. ((<i>S, S</i>)-SL-M003-1)</p> |    | -10 | 58 |
| <p><math>(3S,3'S,4S,4'S,11bS,11'bS)</math>-(+)-4,4'-Di-<i>tert</i>-butyl-4,4',5,5'-tetrahydro-3,3'-bi-3H-dinaphtho[2,1-c:1',2'-e]phosphepin. (<i>S</i>)-BINAPINE</p>        |   | -   | -  |
| <p>(<i>R</i>)-1-[(<i>R</i>)-<math>\alpha</math>-(Dimethylamino)-2-(diphenylphosphino)benzyl]-2-diphenylphosphinoferrocene (SL-T001-1)</p>                                   |  | -82 | 65 |
| <p>(<i>R</i>)-1-Dicyclohexylphosphino-2-[(<i>S</i>)-<math>\alpha</math>-(N,N-dimethylamino)-odicyclohexylphosphinophenyl)methyl]ferrocene ((<i>R,S</i>)-SL-T002-1)</p>      |  | -9  | 53 |
| <p>(<i>S</i>)-(-)-2,2'-Bis(N-diphenylphosphinoamino)-5,5',6,6',7,7',8,8'-octahydro-1,1'-binaphthyl. CTH-(<i>S</i>)-BINAM</p>                                                |  | 16  | 35 |
| <p>(<i>R</i>)-1-[(<i>S</i>)-2-Diethylphosphino]ferrocenyl]ethyl di(<i>tert</i>-butyl)-phosphine. (SL-J301-1)</p>                                                            |  | -   | -  |
| <p>(<i>S</i>)-1,1'-Bis-{4,5-dihydro-3H-dinaphtho[2,1-c:1',2'-e]phosphino}ferrocene. (<i>S, S</i>-f-Binaphane)</p>                                                           |  | 40  | 43 |

|                                                                                                                                                 |                                                                                                                 |     |    |
|-------------------------------------------------------------------------------------------------------------------------------------------------|-----------------------------------------------------------------------------------------------------------------|-----|----|
| ( <i>R</i> )-(+)-1,1'-Bis(diphenylphosphino)-2,2'-bis( <i>N,N</i> -diisopropylamido)ferrocene. ( <i>R</i> )-CTH-JAFAPHOS                        | 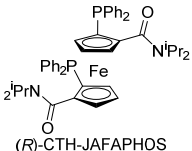<br>( <i>R</i> )-CTH-JAFAPHOS | -16 | 43 |
| 1,2-Bis[(2 <i>R</i> ,5 <i>R</i> )-2,5-dimethylphospholano]benzene.<br>( <i>R,R</i> )-Me-DuPhos                                                  |                               | -   | -  |
| 1,2-Bis[(2 <i>R</i> ,5 <i>R</i> )-2,5-diisopropylphospholano]benzene.<br>( <i>R,R</i> )- <i>i</i> -Pr-DuPhos                                    |                               | -   | -  |
| 1,2-Bis[(2 <i>R</i> ,5 <i>R</i> )-2,5-diethylphospholano]benzene.<br>( <i>R,R</i> )-Et-DuPhos                                                   |                               | -   | -  |
| ( <i>R</i> )-(+)-Bis-(1,2-Diphenylphosphino)propane                                                                                             |                              | 5   | 22 |
| ( <i>R</i> )-1-[( <i>S</i> )-2-Di-ethylphosphino]ferrocenyl]ethyl-di-(2-methylphenyl)phosphine. (SL-J302-1)                                     |                             | -   | -  |
| (2 <i>R</i> )-1-[(1 <i>R</i> )-1-[Bis(1,1-dimethylethyl)phosphino]ethyl]-2-[bis[4-(trifluoromethyl)phenyl]phosphino]ferrocene.<br>(SL-J011-1)   |                             | -   | -  |
| ( <i>R</i> )-1-[( <i>S</i> )-2-Bis(3,5-dimethylphenyl)phosphino]ferrocenyl]ethyl bis(3,5-dimethylphenyl)-phosphine.<br>(SL-J408-1)              |                             | -   | -  |
| ( <i>R</i> )-1-[( <i>S</i> )-2-Bis(3,5-dimethylphenyl)phosphino]ferrocenyl]ethyl-bis[bis-(3,5-trifluoromethyl)phenyl]-phosphine.<br>(SL-J412-1) |                             | -13 | 37 |
| (1 <i>S</i> )-1-[(1 <i>R</i> )-1-[Bis(bicyclo[2.2.1]hept-2-yl)phosphino]ethyl]-2-[2-(diphenylphosphino)phenyl]ferrocene.<br>(SL-W022-1)         |                             | 42  | 56 |



|                                                                                                                                                                                                            |  |    |    |
|------------------------------------------------------------------------------------------------------------------------------------------------------------------------------------------------------------|--|----|----|
| Bis( <i>S</i> )-1-[( <i>R</i> )-2-(Diphenylphosphino)ferrocenyl]ethyl-di-cyclohexylphosphine. (SL-J851-2, bis SL-J001)                                                                                     |  | 28 | 32 |
| Bis( <i>S</i> )-1-[( <i>R</i> )-2-Diphenylphosphino]-ferrocenyl]ethyl-di-3,5-xyllylphosphine. (SL-J852-2, bis SL-J005)                                                                                     |  | 25 | 27 |
| Bis( <i>S</i> )-1-[( <i>R</i> )-2-Di-(4-methoxy-3,5-dimethylphenyl)phosphino]ferrocenyl]ethyl-di-tert.-butylphosphine. (SL-J853-2, bis SL-J013)                                                            |  | -5 | 25 |
| (+)-1,2-Bis((2 <i>S</i> ,5 <i>S</i> )-2,5-diphenylphospholano)ethane. ( <i>S,S</i> )-Ph-BPE                                                                                                                |  | 11 | 47 |
| [(1 <i>R</i> ,2 <i>R</i> ,3 <i>S</i> )-(+)-1,2-Dimethyl-2,3-bis(diphenylphosphino)ethyl]cyclopentyl]methanol. ((+)-catASium I)                                                                             |  | -1 | 43 |
| (2 <i>S</i> ,3 <i>S</i> )-(-)-Bis(diphenylphosphino)butane. (( <i>S,S</i> )-CHIRAPHOS)                                                                                                                     |  | 4  | 26 |
| ( <i>R</i> )-1-[( <i>R</i> )-2-(2'-Diphenylphosphinophenyl)ferrocenyl]-ethyl-diphenylphosphine. (SL-W002-1)                                                                                                |  | 11 | 50 |
| ( <i>S,S</i> )-(+)-1,2-Bis[(2-methoxyphenyl)(phenyl)phosphino]ethane. (( <i>S,S</i> )-DIPAMP)                                                                                                              |  | -  | -  |
| (1 <i>S</i> ,1' <i>S</i> ,2 <i>R</i> ,2' <i>R</i> )-2,2'-Di-tert-butyl-2,3,2',3'-tetrahydro-1 <i>H</i> ,1' <i>H</i> -(1,1')biisosphindolyl. ((1 <i>S</i> ,1' <i>S</i> ,2 <i>R</i> ,2' <i>R</i> )-DuanPhos) |  | 16 | 26 |
| ( <i>R,R</i> )-(-)-1,2-Bis{( <i>R</i> )-4,5-dihydro-3 <i>H</i> -binaphtho[1,2- <i>c</i> :2',1'- <i>e</i> ]phosphino}benzene. (( <i>R</i> )-BINAPHANE)                                                      |  | 4  | 37 |
| (1 <i>S</i> ,1' <i>S</i> ,2 <i>R</i> ,2' <i>R</i> )-1,1'-Di-tert-butyl-(2,2')-diphospholane. (( <i>S,S,R,R</i> )-TangPhos)                                                                                 |  | -  | -  |

|                                                                                                                                                    |                                                                                      |     |    |
|----------------------------------------------------------------------------------------------------------------------------------------------------|--------------------------------------------------------------------------------------|-----|----|
| <p>(<i>R</i>)-1-[(<i>R</i>)-2-(2'-Diphenylphosphinophenyl)ferrocenyl]ethylidi-(3,5-xylyl)phosphine. (SL-W006-1)</p>                                | 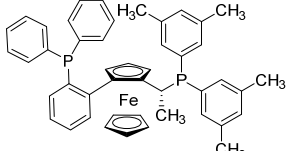   | 11  | 49 |
| <p>(4<i>R</i>,5<i>R</i>)-2,2-Dimethyl-1,3-dioxolane-4,5-diylbis(Methylene)bis(bis(3,5-diMethylphenyl)phosphine). ((-)-MOD DIOP)</p>                |    | -19 | 48 |
| <p>(<i>R</i>)-1-[(<i>R</i>)-2-(2'-Diphenylphosphinophenyl)ferrocenyl]ethylidicyclohexylphosphine. (SL-W003-1)</p>                                  |    | 32  | 43 |
| <p>1<i>R</i>,5<i>R</i>,6<i>R</i>-(+)-1,6-Bis(diphenylphosphinoxy)spiro[4.4]nonane. (CTH-(<i>R</i>)-SpiroP)</p>                                     |    | 23  | 37 |
| <p>(<i>R</i>)-1-[(<i>R</i>)-2-(2'-Diphenylphosphinophenyl)ferrocenyl]ethylidi(bis-3,5-trifluoromethylphenyl)phosphine. (SL-W001-1)</p>             |   | 22  | 63 |
| <p>Methyl-<i>alpha</i>-D-glucopyranoside-2,6-dibenzoate-3,4-di(BIS(3,5-dimethylphenyl)phosphinite). (CarboPhos)</p>                                |  | 8   | 30 |
| <p>(<i>R</i>)-1-[(<i>S</i>)-2-Bis(2-methoxyphenyl)phosphino]ferrocenyl]ethylbis(2-methoxyphenyl)-phosphine. (SL-J430-1)</p>                        |  | 1   | 25 |
| <p>(1<i>S</i>, 2<i>S</i>)-(-)-Bis(methylphenylphosphino)benzene</p>                                                                                |  | -   | -  |
| <p>(<i>S</i>,<i>S</i>)-(-)-2,2'-Bis[(<i>R</i>)-(N,N-dimethylamino)(phenyl)methyl]-1,1'-bis(di(3,5-dimethylphenyl)phosphino)ferrocene. (M009-1)</p> |  | -10 | 47 |

|                                                                                                                                                                         |                                                                                      |     |    |
|-------------------------------------------------------------------------------------------------------------------------------------------------------------------------|--------------------------------------------------------------------------------------|-----|----|
| <p>(<i>R</i>)-1-[(<i>R</i>)-2-(2'-Dicyclohexylphosphinophenyl)ferrocenyl]ethyl-di-(bis-(3,5-trifluoromethyl)phenyl)-phosphine.<br/>(SL-W008-1)</p>                      | 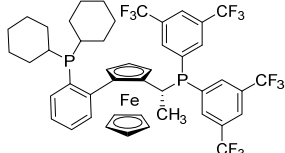   | 12  | 60 |
| <p>1,1-Bis[(2<i>S</i>,3<i>S</i>,4<i>S</i>,5<i>S</i>)-2,5-dimethyl-3,4-O-isopropylidene-3,4-dihydroxyphospholanyl]ferrocene.<br/>(<i>S</i>)-Me-f-KetalPhos</p>           |    | -15 | 34 |
| <p>(1<i>S</i>)-1-[(1<i>R</i>)-1-[Bis[3,5-bis(trifluoromethyl)phenyl]phosphino]ethyl]-2-[2-[bis(4-methoxy-3,5-dimethylphenyl)phosphino]phenyl]ferrocene. (SL-W005-1)</p> |    | 11  | 61 |
| <p>(2<i>R</i>,3<i>R</i>)-(-)-2,3-Bis(diphenylphosphino)bicyclo[2.2.1]hept-5-ene. ((<i>R,R</i>)-NorPhos)</p>                                                             |   | 10  | 23 |
| <p>(3<i>R</i>,4<i>R</i>)-3,4-Bis(diphenylphosphino)-1-benzylpyrrolidine. (catASium D(<i>R</i>))</p>                                                                     |  | 23  | 49 |
| <p>(<i>S,S</i>)-(-)-2,2'-Bis[(<i>R</i>)-(N,N-dimethylamino)(phenyl)methyl]-1,1'-bis(di(2-methylphenyl)phosphino)ferrocene.<br/>(M012-1)</p>                             |  | 10  | 19 |
| <p>(<i>R</i>)-(-)-4,12-Bis(di(3,5-xylyl)phosphino)-[2.2]-paracyclophane.<br/>(CTH-(<i>R</i>)-3,5-xylyl-PHANEPHOS)</p>                                                   |  | -23 | 63 |
| <p>(2<i>S</i>, 4<i>S</i>)-(-)-2,4-Bis(diphenylphosphino)pentane.<br/>((<i>S,S</i>)-BDPP)</p>                                                                            |  | -   | -  |
| <p>(-)-2,3-Bis[(2<i>R</i>,5<i>R</i>)-2,5-dimethylphospholanyl]maleic anhydride.<br/>(Catassium MN An(<i>R</i>))</p>                                                     |  | -   | -  |

|                                                                                                                                                 |                                                                                      |     |    |
|-------------------------------------------------------------------------------------------------------------------------------------------------|--------------------------------------------------------------------------------------|-----|----|
| (-)-4,5-Bis[(2 <i>R</i> ,5 <i>R</i> )-2,5-dimethylphospholanyl](1,2-dimethyl-1, 2-dihydropyridazine-3,6-dione).<br>(Catasium MNN (R))           | 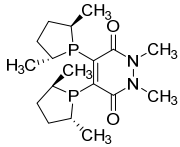   | 15  | 14 |
| 1-Bis(3,5-di- <i>t</i> -butyl-4-methoxyphenyl)phosphino-2-((2 <i>S</i> ,5 <i>S</i> )-2,5-di methylphospholano)<br>(( <i>S,S</i> )-Me-UCAP-DTBM) |    | 1   | 33 |
| ( <i>R,R</i> )-2,3-Bis( <i>tert</i> -butylmethylphosphino)quinoxaline.<br>(( <i>R,R</i> )-QuinoxP*)                                             |    | -2  | 18 |
| ( <i>R</i> )-1-[( <i>S</i> )-2-Diphenylphosphino]-ferrocenyl]ethyl-di-3,5-xyllylphosphine.(SL-J005-1)                                           |    | -16 | 23 |
| ( <i>R</i> )-1-[( <i>S</i> )-2-[Bis(4-fluoro-phenyl)phosphino]ferrocenyl]ethyl-di- <i>tert</i> -butylphosphine. (SL-J014-1)                     |   | 16  | 19 |
| ( <i>R</i> )-1-[( <i>S</i> )-2-Bis(2-methylphenyl)phosphino]ferrocenyl]ethyl di( <i>tert</i> -butyl)-phosphine. (SL-J211-1)                     |  | 22  | 38 |
| ( <i>R</i> )-1-[( <i>S</i> )-2-(Bis(2-naphtyl)-phosphino)ferrocenyl]ethyl di- <i>tert</i> -butylphosphine. (SL-J216-1)                          |  | 18  | 43 |
| ( <i>R</i> )-1-[( <i>S</i> )-2-(Di-1-naphtylphosphino)ferrocenyl]ethyl-di-3,5-xyllylphosphine. (SL-J404-1)                                      |  | 19  | 33 |
| ( <i>R</i> )-1-[( <i>S</i> )-2-Di- <i>tert</i> -butylphosphino]ferrocenyl]ethyl diphenylphosphine. (SL-J502-1)                                  |  | -13 | 20 |
| ( <i>R</i> )-1-[( <i>S</i> )-2-Di- <i>tert</i> -butylphosphino]ferrocenyl]ethyl-di-(2-methyl-phenyl)phosphine. (SL-J505-1)                      |  | -3  | 30 |

|                                                                                                                                                                           |                                                                                      |     |    |
|---------------------------------------------------------------------------------------------------------------------------------------------------------------------------|--------------------------------------------------------------------------------------|-----|----|
| <p>(<i>R</i>)-1-[(<i>S</i>)-2-di(<i>tert</i>-butyl)phosphino]ferrocenyl]ethyl bis(4-trifluoromethyl)-phosphine. (SL-J506-1)</p>                                           | 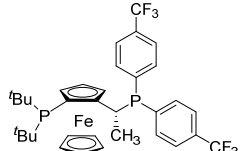   | -1  | 30 |
| <p>4,4-Bis(diphenylphosphine)-2,2'-5,5'-tetramethyl-3,3'-dithiophene. (-)-TMBTP</p>                                                                                       |    | 34  | 31 |
| <p>(<i>R</i>)-(+)-2,2'-Bis(di-<i>p</i>-tolylphosphino)-1,1'-binaphthyl.<br/>(<i>R</i>)-Tol-Binap</p>                                                                      |    | 46  | 22 |
| <p>[(<i>R</i>)-4,4',5,5',6,6'-Hexamethyl 2,2'-bis[diphenylphosphino]-biphenyl.<br/>(<i>R</i>)-Hexaphemp</p>                                                               |    | 39  | 18 |
| <p>(<i>S</i>)-(-)-6,6'-Bis(diphenylphosphino)-1,1'-biphenyl-2,2'-diylbis(acetate). ((<i>S</i>)-Me-SoniPhos)</p>                                                           |   | -   | -  |
| <p>(<i>R</i>)-(+)-5,5'-Dichloro-6,6'-dimethoxy-2,2'-bis(diphenylphosphino)-1,1'-biphenyl. ((<i>R</i>)-Cl,MeO-Biphep)</p>                                                  |  | 28  | 37 |
| <p>(<i>R</i>)-(+)-5,5'-Bis(diphenylphosphino)-4,4'-bi-1,3-benzodioxole,[4(<i>R</i>)-(4,4'-bi-1,3-benzodioxole)-5,5'-diyl]bis[diphenylphosphine]. ((<i>R</i>)-SegPhos)</p> |  | 56  | 29 |
| <p>(<i>S</i>)-2,2'-Bis(di(3,5-di-<i>tert</i>-butyl-4-methoxyphenyl)phosphino)-6,6'-dimethoxy-1,1'-biphenyl. (SL-A109-2)</p>                                               |  | -18 | 23 |

|                                                                                                                                                                         |                                                                                      |     |    |
|-------------------------------------------------------------------------------------------------------------------------------------------------------------------------|--------------------------------------------------------------------------------------|-----|----|
| <p>(<i>R</i>)-(+)-2,2',6,6'-Tetramethoxy-4,4'-bis(diphenylphosphino)-3,3'-bipyridine. (<i>R</i>)-P-Phos)</p>                                                            | 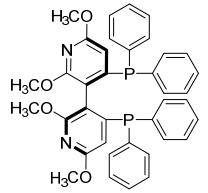   | 54  | 48 |
| <p>[(4<i>R</i>)-(4,4'-bi-1,3-benzodioxole)-5,5'-diyl]bis[bis(3,5-di-tert-butyl-4-methoxyphenyl)phosphine]. (<i>R</i>)-DTBM-SegPhos)</p>                                 |    | 52  | 19 |
| <p>(<i>S</i>)-1,13-Bis(diphenylphosphino)-7,8-dihydro-6H-dibenzof[h][1,5]dioxinin. (<i>s</i>-C<sub>1</sub>-tunephos)</p>                                                |    | -34 | 27 |
| <p><i>s</i>-C<sub>1</sub>-tunephos</p>                                                                                                                                  |    | 15  | 30 |
| <p>(<i>S</i>)-(+)-2,2'-Bis(diphenylphosphino)-1,1'-binaphthyl. (<i>S</i>)-Binap)</p>                                                                                    |   | -46 | 29 |
| <p>(<i>R</i>)-(+)-2,2'-Bis[di(3,5-xylyl)phosphino]-1,1'-binaphthyl. (<i>R</i>)-xyl-binap)</p>                                                                           |  | 42  | 27 |
| <p>(1<i>R</i>)-(+)-[Di(3,5-dimethylphenyl)phosphino]-2-(4-diphenylphosphino-2,5-dimethylthien-3-yl)-1,7,7-trimethylbicyclo[2.2.1]hept-2-ene (<i>R</i>)-Catasium T2)</p> |  | -2  | 44 |
| <p>[(4<i>R</i>)-(4,4-Bi-1,3-benzodioxole)-5,5'-diyl]bis[bis(3,5-dimethylphenyl)phosphine] (<i>R</i>)-DM-SegPhos)</p>                                                    |  | 51  | 26 |

|                                                                                                                                         |                                                                                      |     |    |
|-----------------------------------------------------------------------------------------------------------------------------------------|--------------------------------------------------------------------------------------|-----|----|
| <p>(<i>R</i>)-(-)-5,5'-Bis(diphenylphosphino)-2,2,2',2'-tetrafluoro-4,4'-bi-1,3-benzodioxole. ((<i>R</i>)-DifluoroPhos)</p>             | 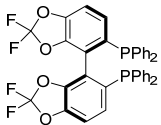   | 49  | 49 |
| <p>(<i>S</i>)-(-)-2,2'-Bis[di(3,5-xylyl)phosphino]-6,6'-dimethoxy-1,1'-biphenyl. (SL-A120-2)</p>                                        |    | -42 | 23 |
| <p>(<i>R</i>)-(+)-2,2''-BIS(Diphenylphosphino)-5,5'',6,6'',7,7'',8,8''-octahydro-1,1''-binaphthyl. ((<i>R</i>)-H<sub>8</sub>-BINAP)</p> |    | 30  | 30 |
| <p>(<i>S</i>)-(-)-2,2',6,6'-Tetramethoxy-4,4'-bis(di(3,5-xylyl)phosphino)-3,3'-bipyridine. ((<i>S</i>)-Xylyl-P-Phos)</p>                |   | -44 | 38 |
| <p>(<i>S</i>)-(-)-6,6'-Bis(diphenylphosphino)-1,1'-biphenyl-2,2'-diylbis(cyclohexylcarboxylate) ((<i>S</i>)-cHex-Soniphos)</p>          |  | -43 | 28 |
| <p>(<i>R</i>)-(+)-2,2'-Bis(di-ptolylphosphino)-6,6'-dimethoxy-1,1'-biphenyl (SL-A102-1)</p>                                             |  | 37  | 20 |
| <p>(<i>R</i>)-(+)-2,2'-Bis[di(3,5-di-<i>i</i>-propyl-4-dimethylaminophenyl)phosphino]-6,6'-dimethoxy-1,1'-biphenyl (SL-A107-1)</p>      |  | 9   | 23 |



|                                                                                                                                |                                                                                      |    |    |
|--------------------------------------------------------------------------------------------------------------------------------|--------------------------------------------------------------------------------------|----|----|
| <p>(<i>R</i>)-(+)-2,2'-Bis[di(3,4,5-trimethoxyphenyl)phosphino]-6,6'-dimethoxy-1,1'-biphenyl. (SL-A104-1)</p>                  | 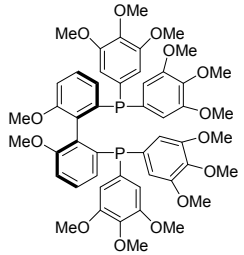   | 58 | 33 |
| <p>(<i>R</i>)-2,2'-Bis[bis(3,5-di-<i>tert</i>-butyl phenyl)phosphino]-6,6'-dimethoxy-1,1'-biphenyl. (SL-A121-1)</p>            |    | 18 | 20 |
| <p>(<i>R</i>)-(+)-2,2'-Bis(di-2-furylphosphino)-6,6'-dimethoxy-1,1'-biphenyl. (SL-A108-1)</p>                                  |    | 19 | 60 |
| <p>(<i>R</i>)-2,2'-Bis(diisopropylphosphino)-6,6'-dimethoxy-1,1'-biphenyl. (SL-A116-1)</p>                                     |  | 7  | 19 |
| <p>(<i>R</i>)-2,2'-Bis(dicyclobutylphosphino)-6,6'-dimethoxy-1,1'-biphenyl. (SL-A118-1)</p>                                    |  | 24 | 25 |
| <p>((<i>S</i>)-4-Isopropyl-2-[(<i>S</i>)-2-(diphenylphosphino)ferrocen-1-yl]oxazoline). SL-N003-2</p>                          |  | -  | -  |
| <p>((<i>S</i>)-4-Isopropyl-2-[(<i>S</i>)-2-(bis(3,5-dimethyl-4-methoxyphenyl)phosphino)ferrocen-1-yl]oxazoline). SL-N008-2</p> |  | -  | -  |
| <p>((<i>S</i>)-4-Isopropyl-2-[(<i>S</i>)-2-(bis(1-naphthyl)phosphino)ferrocen-1-yl]oxazoline). SL-N011-2</p>                   |  | -  | -  |
| <p>((<i>S</i>)-4-Isopropyl-2-[(<i>S</i>)-2-(bis(2-methoxyphenyl)phosphino)ferrocen-1-yl]oxazoline). SL-N012-2</p>              |  | 41 | 14 |

|                                                                                                                                             |                                                                                      |     |    |
|---------------------------------------------------------------------------------------------------------------------------------------------|--------------------------------------------------------------------------------------|-----|----|
| <p>(<i>S</i>)-(-)-7,7'-Bis[di(3,5-dimethylphenyl)phosphino]-1,1'-s pirobiindane. ((<i>S</i>)-Xyl-SDP)</p>                                   | 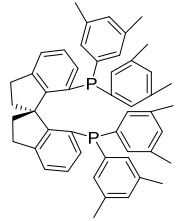   | 47  | 35 |
| <p>(<i>S</i>)-(-)-7,7'-Bis[di(4-methylphenyl)phosphino]-2,2',3,3'-t etrahydro-1,1'-spirobiindene. ((<i>S</i>)-Tol-SDP)</p>                  |    | 45  | 34 |
| <p>(<i>S</i>)-(-)-7,7'-Bis(diphenylphosphino)-2,2',3,3'-tetrahydro- 1,1'-spirobiindene. ((<i>S</i>)-SDP)</p>                                |    | 46  | 29 |
| <p>(<i>R</i>)-(-)-1-[(<i>S</i>)-2-(Diphenylphosphino)ferrocenyl]ethylidic ylcohexylphosphine. (SL-J001-1)</p>                               |   | -24 | 18 |
| <p>(<i>R</i>)-1-[(<i>S</i>)-2-Diphenylphosphinoferrocenyl]ethylid-tert- butylphosphine (SL-J002-1)</p>                                      |  | 0   | 19 |
| <p>(<i>R</i>)-1-[(<i>S</i>)-2-(Dicyclohexylphosphino)ferrocenyl]ethylidi phenylphosphine. (SL-J004-1)</p>                                   |  | 8   | 19 |
| <p>(<i>R</i>)-1-[(<i>S</i>)-2-Di-(3,5-bis(trifluoromethyl)phenyl-phosphi no)ferrocenyl]-ethyl-dicyclohexylphosphine. (SL-J006-1)</p>        |  | 0   | 33 |
| <p>(<i>R</i>)-1-[(<i>S</i>)-2-Di-(3,5-bis(trifluoromethyl)phenyl-phosphi no)-ferrocenyl]-ethyl-di-3,5-xyllylphosphine. (SL-J008-1)</p>      |  | -15 | 49 |
| <p>(<i>R</i>)-1-[(<i>S</i>)-2-Di-(4-methoxy-3,5-dimethylphenyl-phosphi no)ferrocenyl]-ethyl-di-<i>tert</i>-butyl-phosphine. (SL-J013-1)</p> |  | -4  | 18 |

|                                                                                                                                          |                                                                                      |     |    |
|------------------------------------------------------------------------------------------------------------------------------------------|--------------------------------------------------------------------------------------|-----|----|
| ( <i>R</i> )-1-[( <i>S</i> )-2-(Di-2-furylphosphino)ferrocenyl]-ethyl-di- <i>tert</i> -butylphosphine. (SL-J212-1)                       | 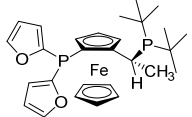   | 19  | 30 |
| ( <i>R</i> )-1-[( <i>S</i> )-2-Di-(4-methoxy-3,5-dimethylphenyl-phosphino)ferrocenyl]-ethyl-di-2-methylphenyl-phosphine. (SL-J425-1)     |    | -5  | 29 |
| ( <i>R</i> )-1-[( <i>S</i> )-2-(Di-2-furylphosphino)ferrocenyl]-ethyl-di-2-methylphenylphosphine. (SL-J452-1)                            |    | 10  | 47 |
| ( <i>R</i> )-1-[( <i>S</i> )-2-diethylphosphino]ferrocenyl]ethyl bis(2-methylphenyl)-phosphine. (SL-J503-1)                              |    | 8   | 23 |
| ( <i>R</i> )-1-[( <i>S</i> )-2-Di-(3,5-bis(trifluoromethyl)phenyl)phosphino]ferrocenyl]ethyl-di- <i>t</i> -butyl- phosphine. (SL-J210-1) |   | 28  | 55 |
| ( <i>R</i> )-(-)-1-[( <i>S</i> )-2-(Dicyclohexylphosphino)ferrocenyl]ethyl dicyclohexylphosphine. (SL-J003-1)                            |  | 19  | 16 |
| ( <i>R</i> )-1-[( <i>S</i> )-2-Di-(4-methoxy-3,5-dimethylphenyl-phosphino)ferrocenyl]-ethyl-dicyclohexylphosphine. (SL-J007-1)           |  | -15 | 21 |
| ( <i>R</i> )-1-[( <i>S</i> )-2-(Dicyclohexylphosphino)ferrocenyl]-ethyl-di- <i>tert</i> -butylphosphine. (SL-J009-1)                     |  | 7   | 19 |
| ( <i>R</i> )-1-[( <i>S</i> )-2-[Bis(4-methyl-phenyl)phosphino]ferrocenyl]-ethyl-di- <i>tert</i> -butylphosphine. (SL-J012-1)             |  | 24  | 20 |
| ( <i>S</i> )-1-[( <i>R</i> )-2-(Di-2-furylphosphino)ferrocenyl]-ethyl-di-3,5-xyllylphosphine. (SL-J015-2)                                |  | 15  | 23 |

|                                                                                                                                                                                             |  |     |    |
|---------------------------------------------------------------------------------------------------------------------------------------------------------------------------------------------|--|-----|----|
| (2 <i>R</i> )-1-[(1 <i>R</i> )-1-[Bis(3,5-dimethylphenyl)phosphino]ethyl]-2-[bis(4-methoxy-3,5-dimethylphenyl)phosphino]ferrocene. (SL-J418-1)                                              |  | -9  | 21 |
| ( <i>R</i> )-1-[( <i>S</i> )-2-Cyclohexylphosphino]ferrocenyl]ethyl bis(2-methylphenyl)-phosphine. (SL-J504-1)                                                                              |  | 4   | 19 |
| ( <i>R</i> )-(-)-[4- <i>N,N</i> -Dimethylamino]dinaphtho[2,1- <i>d</i> :1',2'- <i>f</i> ][1,3,2]dioxaphosphepine. (( <i>R</i> )-MonoPhos)                                                   |  | 38  | 32 |
| ( <i>S</i> )-(+)-(3,5-Dioxa-4-phospha-cyclohepta[2,1- <i>a</i> :3,4- <i>a'</i> ]dinaphthalen-4-yl)benzyl(methyl)amine. (( <i>S</i> )- <i>N</i> -Me- <i>N</i> -Bn-MonoPhos)                  |  | -12 | 28 |
| ( <i>S</i> )-(+)-(3,5-Dioxa-4-phosphacyclohepta[2,1- <i>a</i> :3,4- <i>a'</i> ]dinaphthalen-4-yl)piperidine. (( <i>S</i> )-PipPhos)                                                         |  | -6  | 23 |
| ( <i>S</i> )-(+)-(2,6-Dimethyl-3,5-dioxa-4-phospha-cyclohepta[2,1- <i>a</i> :3,4- <i>a'</i> ]dinaphthalen-4-yl)dimethylamine. (( <i>S</i> )-2,6-Me-MonoPhos)                                |  | -16 | 27 |
| ( <i>S</i> )-(+)-(3,5-Dioxa-4-phospha-cyclohepta[2,1- <i>a</i> :3,4- <i>a'</i> ]dinaphthalen-4-yl)[(1 <i>R</i> )-1-phenylethyl]amine. (( <i>S,R</i> )-(a-MeBn)-MonoPhos)                    |  | 14  | 18 |
| ( <i>S</i> )-(+)-(3,5-Dioxa-4-phospha-cyclohepta[2,1- <i>a</i> :3,4- <i>a'</i> ]dinaphthalen-4-yl)bis[(1 <i>R</i> )-1-phenylethyl]amine (( <i>S,R,R</i> )-(a-MeBn) <sub>2</sub> -MonoPhos)  |  | -12 | 30 |
| ( <i>S</i> )-(+)-(3,5-Dioxa-4-phospha-cyclohepta[2,1- <i>a</i> :3,4- <i>a'</i> ]dinaphthalen-4-yl)bis[(1 <i>S</i> )-1-phenylethyl]amine. (( <i>S,S,S</i> )-(a-MeBn) <sub>2</sub> -MonoPhos) |  | -72 | 34 |
| ( <i>S</i> )-(+)-(8,9,10,11,12,13,14,15-Octahydro-3,5-dioxa-4-phospha-cyclohepta[2,1- <i>a</i> :3,4- <i>a'</i> ]dinaphthalen-4-yl)dimethylamine. (( <i>S</i> )-H <sub>8</sub> -MonoPhos)    |  | -11 | 23 |
| 1-[(11 <i>bS</i> )-8,9,10,11,12,13,14,15-Octahydrodinaphtho[2,1- <i>d</i> :1',2'- <i>f</i> ][1,3,2]dioxaphosphepin-4-yl]piperidine. (( <i>S</i> )-H <sub>8</sub> -PipPhos)                  |  | -   | -  |
| ( <i>R</i> )-Binaphthylisopropylphosphite. (( <i>R</i> )-BINOL-P-O <sup>i</sup> Pr)                                                                                                         |  | -   | -  |
| ( <i>R</i> )-Binaphthylisobutylphosphite. (( <i>R</i> )-BINOL-P-O <sup>i</sup> Bu)                                                                                                          |  | -   | -  |

|                                                                                                                                                                                                 |                                                                                      |    |    |
|-------------------------------------------------------------------------------------------------------------------------------------------------------------------------------------------------|--------------------------------------------------------------------------------------|----|----|
| (3 <i>aR</i> ,8 <i>aR</i> )-(-)-(2,2-Dimethyl-4,4,8,8-tetraphenyl-tetrahydro-[1,3]dioxolo[4,5- <i>e</i> ][1,3,2]dioxaphosphepin-6-yl)dimethylamine. (( <i>R,R</i> )-TADDOL-P-NMe <sub>2</sub> ) | 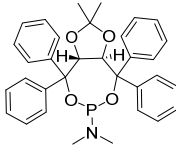   | -  | -  |
| (11 <i>aR</i> )-(+)-10,11,12,13-Tetrahydrodiinden[7,1- <i>de</i> :1',7'- <i>fg</i> ][1,3,2]dioxaphosphocin-5-dimethylamine. (( <i>R</i> )-SIPhos)                                               |    | 38 | 38 |
| (11 <i>aR</i> )-(+)-10,11,12,13-Tetrahydrodiinden[7,1- <i>de</i> :1',7'- <i>fg</i> ][1,3,2]dioxaphosphocin-5-bis(( <i>R</i> )-1-phenylethyl)amine. (( <i>R</i> )-SIPhos-PE)                     |    | 50 | 43 |
| (11 <i>aR</i> )-(+)-10,11,12,13-Tetrahydrodiinden[7,1- <i>de</i> :1',7'- <i>fg</i> ][1,3,2]dioxaphosphocin-5-phenoxy. (( <i>R</i> )-ShiP)                                                       |    | 47 | 43 |
| 2,10-Dimethyl-N,N-bis[(1 <i>S</i> )-1-phenylethyl]-12H-Dibenzo[ <i>d,g</i> ][1,3,2]dioxaphosphocin-6-amine. (( <i>S,S</i> )-Mikami Ligand)                                                      |   | 5  | 25 |
| 4,8-Di- <i>tert</i> -butyl-2,10-dimethyl-N,N-bis[(1 <i>S</i> )-1-phenylethyl]-12H-Dibenzo[ <i>d,g</i> ][1,3,2]dioxaphosphocin-6-amine. (( <i>S,S</i> )- <i>t</i> Bu-Mikami Ligand)              |  | 32 | 25 |
| ( <i>R</i> )-1-(2-Diphenylphosphino-1-naphthyl)isoquinoline. (( <i>R</i> )-Quinap)                                                                                                              |  | -  | -  |
| ( <i>R</i> )-(+)-4-[2-(Diphenylphosphino)-1-naphthalenyl]- <i>n</i> -[( <i>r</i> )-1-phenylethyl]-1-phthalazinamine. (( <i>R</i> )-N-PINAP)                                                     |  | -  | -  |
| ( <i>R</i> )-(+)-2-Diphenylphosphino-2'-methoxy-1,1'-binaphthyl. ( <i>R</i> )-MOP                                                                                                               |  | -  | -  |
| (2 <i>R</i> ,5 <i>R</i> )-1-[2-[(2 <i>R</i> ,5 <i>R</i> )-2,5-Dimethylphospholan-1-yl]phenyl]-2,5-dimethylphospholane 1-oxide. (( <i>R,R</i> )-Me-DuPhos Monoxide)                              |  | -  | -  |

|                                                                                                                                                                                                                             |  |    |    |
|-----------------------------------------------------------------------------------------------------------------------------------------------------------------------------------------------------------------------------|--|----|----|
| (2 <i>S</i> ,5 <i>S</i> )-(+)-1-(2-(1,3-Dioxolan-2-yl)phenyl)-2,5-dimethylphospholane. (( <i>S,S</i> )-Me-RajPhos)                                                                                                          |  | 8  | 33 |
| (2 <i>S</i> ,5 <i>S</i> )-(-)-1-(2-(1,3-Dioxolan-2-yl)phenyl)-2,5-diethylphospholane. (( <i>S,S</i> )-Et-RajPhos)                                                                                                           |  | 13 | 35 |
| 2,2'-[(1 <i>S</i> ,3 <i>S</i> )-2,3,5,10-Tetrahydro-5,10-dioxo-2-phenyl-1 <i>H</i> -[1,2,4]diazaphospholo[1,2- <i>b</i> ]phthalazine-1,3-diyl]bis[N-(1 <i>S</i> )-1-phenylethyl]benzamide. (( <i>S,S,S</i> )-DiazaPhos-PPE) |  | 1  | 30 |

Most promising hits (only two ligands can give more than 60% ee)

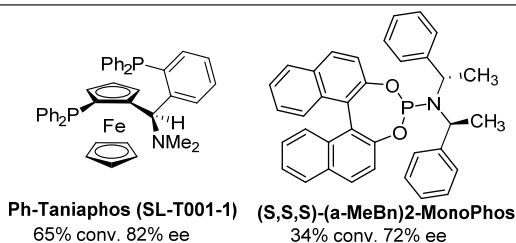

## 7.2 24 Chiral ligand screening with an acyclic electrophile and **1c**.

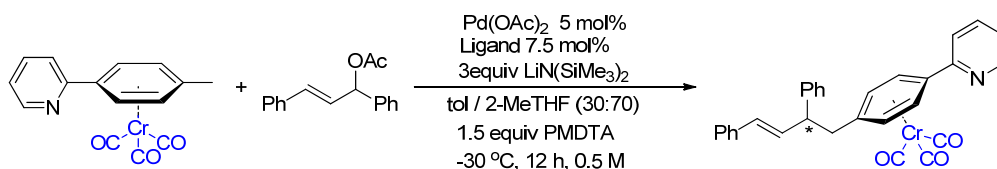

### General Experimental for the ligand screening:

Set up:

Experiments were set up inside a glovebox under a nitrogen atmosphere. A 24-well aluminum blocks containing 1 mL glass vials were predosed with Pd(OAc)<sub>2</sub> (1 μmol) and the chiral phosphine ligands (2 μmol for monodentate ligands and 1 μmol for bidentate ligands) in THF. The solvent was removed to dryness using a GeneVac. The plate was cooled down to -20 °C in glovebox fridge overnight. 3 equiv. LiN(SiMe<sub>3</sub>)<sub>2</sub> (30 μmol), 1 equiv (2-(*η*<sup>6</sup>-*p*-tolyl)pyridine)Cr(CO)<sub>3</sub> (**1c**, 10 μmol), 2 equiv **2c** (20 μmol), 1.5 equiv PMDTA (pentamethyldiethylenetriamine, 15 μmol) additive were then dosed together into each reaction vial as a solution in THF (100 μL, 0.1 M). The 24-well plates were then sealed and stirred for 12 h at -30 °C.

Work up:

Upon opening the plate to air, 500 μL of acetonitrile containing biphenyl (1 μmol/reaction, used as an internal standard) was added into each vial. The plates were covered again and the vials stirred for 10 min. to ensure good homogenization. Into a separate 96-well LC blocks were added 700 μL of

acetonitrile, followed by 25  $\mu\text{L}$  of the diluted reaction mixtures. The LC blocks were then sealed with a silicon-rubber storage mat and mounted on an automated HPLC instrument for analysis.

| ligand                                                                                                                                            | Structure | Ee(%) | Pdt/IS |
|---------------------------------------------------------------------------------------------------------------------------------------------------|-----------|-------|--------|
| ( <i>S</i> )-(-)-(1,1'-Binaphthalene-2,2'-diyl)bis(diphenylphosphine);<br>( <i>S</i> )-Binap                                                      |           | 60    | 0.87   |
| ( <i>R</i> )-(+)-5,5'-Bis(diphenylphosphino)-4,4'-bi-1,3-benzodioxole;<br>( <i>R</i> )-segphos                                                    |           | 76    | 0.46   |
| ( <i>S</i> )-(-)-7,7'-Bis(diphenylphosphino)-2,2',3,3'-tetrahydro-1,1'-spirobiindene;<br>( <i>S</i> )-SDP                                         |           | 34    | 0.18   |
| ( <i>R</i> )-(-)-4,12-Bis(di-3,5-xyllylphosphino)[2.2]paracyclophane;<br>( <i>R</i> )-3,5-xyllyl-PHANEPHOS                                        |           | 38    | 0.29   |
| (+)-(5,5'-Dichloro-6,6'-dimethoxy-1,1'-biphenyl)-2,2'-diyl-bis(diphenylphosphine);<br>( <i>R</i> )-Cl,MeO-BIPHEP                                  |           | 60    | 0.28   |
| (1 <i>R</i> ,2 <i>R</i> )-(+)-1,2-Diaminocyclohexane- <i>N,N'</i> -bis(2-diphenylphosphinobenzoyl); ( <i>R,R</i> )-DACH-phenyl Trost ligand       |           | --    | --     |
| ( <i>R,R</i> )-1,2-Bis[( <i>R</i> )-4,5-dihydro-3 <i>H</i> -binaphtho(1,2- <i>c</i> :2',1'- <i>e</i> )phosphepino]benzene; ( <i>R</i> )-BINAPHANE |           | 9     | 0.22   |
| ( <i>R</i> )-(+)-1,1'-Bis(diphenylphosphino)-2,2'-bis( <i>N,N</i> -diisopropylamido)ferrocene; ( <i>R</i> )-CTH-JAFAPHOS                          |           | 93    | 0.44   |



|                                                                                                                                 |  |    |      |
|---------------------------------------------------------------------------------------------------------------------------------|--|----|------|
| (S <sub>P</sub> ,S' <sub>P</sub> )-1,1'-Bis[(R)-(dimethylamino)phenylmethyl]-2,2'-bis(diphenylphosphino)ferrocene;<br>SL-M001-1 |  | 54 | 0.29 |
| (2R)-1-[(1R)-1-[Bis(3,5-dimethylphenyl)phosphino]ethyl]-2-(diphenylphosphino)ferrocene; SL-J005-1                               |  | 63 | 0.21 |
| (R)-1-[(R)-2-(2'-Diphenylphosphinophenyl)-ferrocenyl]-ethyl-diphenylphosphine; (R, R)-SL-W002-1                                 |  | 65 | 0.49 |
| (2S)-1-[(S)-(Dimethylamino)[2-(diphenylphosphino)phenyl]methyl]-2-(diphenylphosphino)ferrocene;<br>(S, S)-SL-T001-1             |  | 43 | 0.39 |
| (+)-((5,6),(5',6'))-Bis(methylenedioxy)biphenyl-2,2'-diylbis(bis(cyclohexyl)phosphine);<br>(+)-Cy-SEGPPOS                       |  | 48 | 0.40 |
| (1R)-1-[Bis[3,5-bis(trifluoromethyl)phenyl]phosphino]-2-[(1R)-1-[bis(3,5-dimethylphenyl)phosphino]ethyl]ferrocene; SL-J008-1    |  | -- | --   |
| (RP,R'P)-1,1'-Bis(dicyclohexylphosphino)-2,2'-bis[(S)-α-(dimethylamino)benzyl]ferrocene; SL-M002-2                              |  | 81 | 0.32 |
| (R)-1-[(S)-2-Diphenylphosphinoferrocenyl]ethyl-di-tert-butylphosphine; SL-J002-1                                                |  | 40 | 0.18 |
| (1S)-1-[(1R)-1-(Dicyclohexylphosphino)ethyl]-2-[2-(diphenylphosphino)phenyl]ferrocene;<br>SL-W003-1                             |  | 64 | 0.57 |

|                                                                                                                                                                                                                         |  |    |      |
|-------------------------------------------------------------------------------------------------------------------------------------------------------------------------------------------------------------------------|--|----|------|
| (1 <i>S</i> )-1-(Dicyclohexylphosphino)-2-[( <i>R</i> )-[2-(dicyclohexylphosphino)phenyl](dimethylamino)methyl]ferrocene; SL-T002-1                                                                                     |  | 0  | 0.31 |
| 1,2-Bis[(2 <i>S</i> ,5 <i>S</i> )-2,5-diphenylphospholano]ethane(1,5-cyclooctadiene)rhodium(I) tetrafluoroborate; ( <i>S</i> , <i>S</i> )-Ph-BPE                                                                        |  | 8  | 0.23 |
| (1 <i>S</i> ,1' <i>S</i> ,2 <i>R</i> ,2' <i>R</i> )-2,2'-Di- <i>tert</i> -butyl-2,3,2',3'-tetrahydro-1 <i>H</i> ,1' <i>H</i> (1,1')biiisophosphindolyl; (1 <i>S</i> , 1' <i>S</i> , 2 <i>R</i> , 2' <i>R</i> )-DuanPhos |  | -- | --   |
| ( <i>R</i> ,<br><i>R</i> )-(-)-2,3-Bis( <i>tert</i> -butylmethylphosphino)quinoxaline;<br>( <i>R,R</i> )-QuinoxP*                                                                                                       |  | -- | --   |
| (2 <i>R</i> ,2' <i>R</i> ,5 <i>R</i> ,5' <i>R</i> )-2,2',5,5'-Tetramethyl-1,1'-( <i>o</i> -phenylene)diphospholane;<br>( <i>R,R</i> )-Me-DuPhos                                                                         |  | -- | --   |
| ( <i>R</i> )-(-)-2-[2-(Diphenylphosphino)phenyl]-4-phenyl-2-oxazoline                                                                                                                                                   |  | -- | --   |
| ( <i>S</i> )-(+)-(3,5-Dioxa-4-phosphacyclohepta[2,1-a:3,4-a']dinaphthalen-4-yl)piperidine; ( <i>S</i> )-PipPhos                                                                                                         |  | -- | --   |

Promising hit

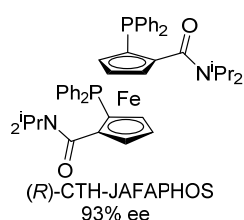

### 7.3 AAA in lab scale using acyclic electrophile

**General Procedure D:** To an oven-dried microwave vial equipped with a stir bar was added Pd salts (0.005 mmol) and (*R*)-CTH-JAFAPHOS (5.61 mg, 0.0075 mmol) under nitrogen atmosphere inside a glove box at room temperature. Next, 0.7 mL of dry 2-MeTHF and 0.3 mL of dry toluene were added sequentially via syringe. After the catalyst/ligand solution was stirred for 30 min at 24 °C inside the glove box, (2-( $\eta^6$ -*p*-tolyl)pyridine)Cr(CO)<sub>3</sub> (30.5 mg, 0.1 mmol) was added to the reaction vial followed by LiN(SiMe<sub>3</sub>)<sub>2</sub> (50.2 mg, 0.3 mmol). The microwave vial was sealed and removed from the

glove box. The microwave vial was cooled to -30 °C, PMDTA (33  $\mu$ L, 0.15 mmol, 1.5 equiv) was added via microsyringe, and the resulting yellow solution stirred for additional 5 min. A solution of the allylic electrophile in 2-MeTHF/toluene (v/v = 0.3 mL/ 0.7 mL, 0.3 mmol) was added via syringe over 10 min under nitrogen atmosphere and the reaction mixture was stirred under nitrogen atmosphere for 12 h at -30 °C . Next, 5 drops water were added via syringe, and then the vial opened to air. The reaction mixture was passed through a short pad of silica gel and rinsed with 10 mL 10:1 ethyl acetate: methanol. The solvent was removed by rotary evaporator. The residue was purified by flash chromatography.

**Optimization of the palladium salts using (1,3-diphenylallyl) carbonate:**

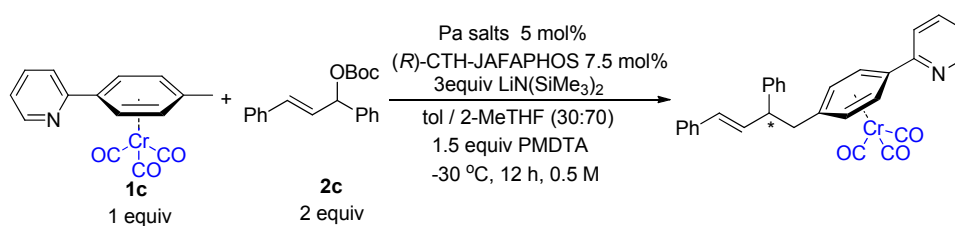

| Entry                | Pd salts                   | Yield(%) <sup>a</sup> | Ee(%) <sup>b</sup> |
|----------------------|----------------------------|-----------------------|--------------------|
| <b>1<sup>c</sup></b> | Pd(OAc) <sub>2</sub>       | 55                    | 90                 |
| <b>2<sup>c</sup></b> | Pd(COD)Cl <sub>2</sub>     | 64                    | 99                 |
| <b>3<sup>c</sup></b> | [Pd(allyl)Cl] <sub>2</sub> | 73                    | 86                 |
| <b>4<sup>d</sup></b> | Pd(COD)Cl <sub>2</sub>     | 72                    | 99                 |
| <b>5<sup>e</sup></b> | Pd(OAc) <sub>2</sub>       | 73                    | -38                |

[a] Isolated yield. [b] The ee was determined by HPLC. [c] Reactions performed using 1.0 equiv. of **1c**, 2 equiv. of **2c** and 3 equiv LiN(SiMe<sub>3</sub>)<sub>2</sub> on a 0.1 mmol scale. [d] Reactions performed using 1.0 equiv. of **1c**, 3 equiv. of **2c** and 4 equiv LiN(SiMe<sub>3</sub>)<sub>2</sub> on a 0.1 mmol scale. The concentration was 0.025M. [e] Reactions performed using 1.0 equiv. of **1c**, 2 equiv. of **2c** and 3 equiv LiN(SiMe<sub>3</sub>)<sub>2</sub> on a 0.1 mmol scale. The concentration was 0.05M. Ph-Taniaphos was used instead of (R)-CHT-JAPAPHOS.

## 8. NMR Spectrum

(-)-( $\eta^6$ -(2-cyclohexen-1-ylmethyl)-benzene)Cr(CO)<sub>3</sub> (**3a**)

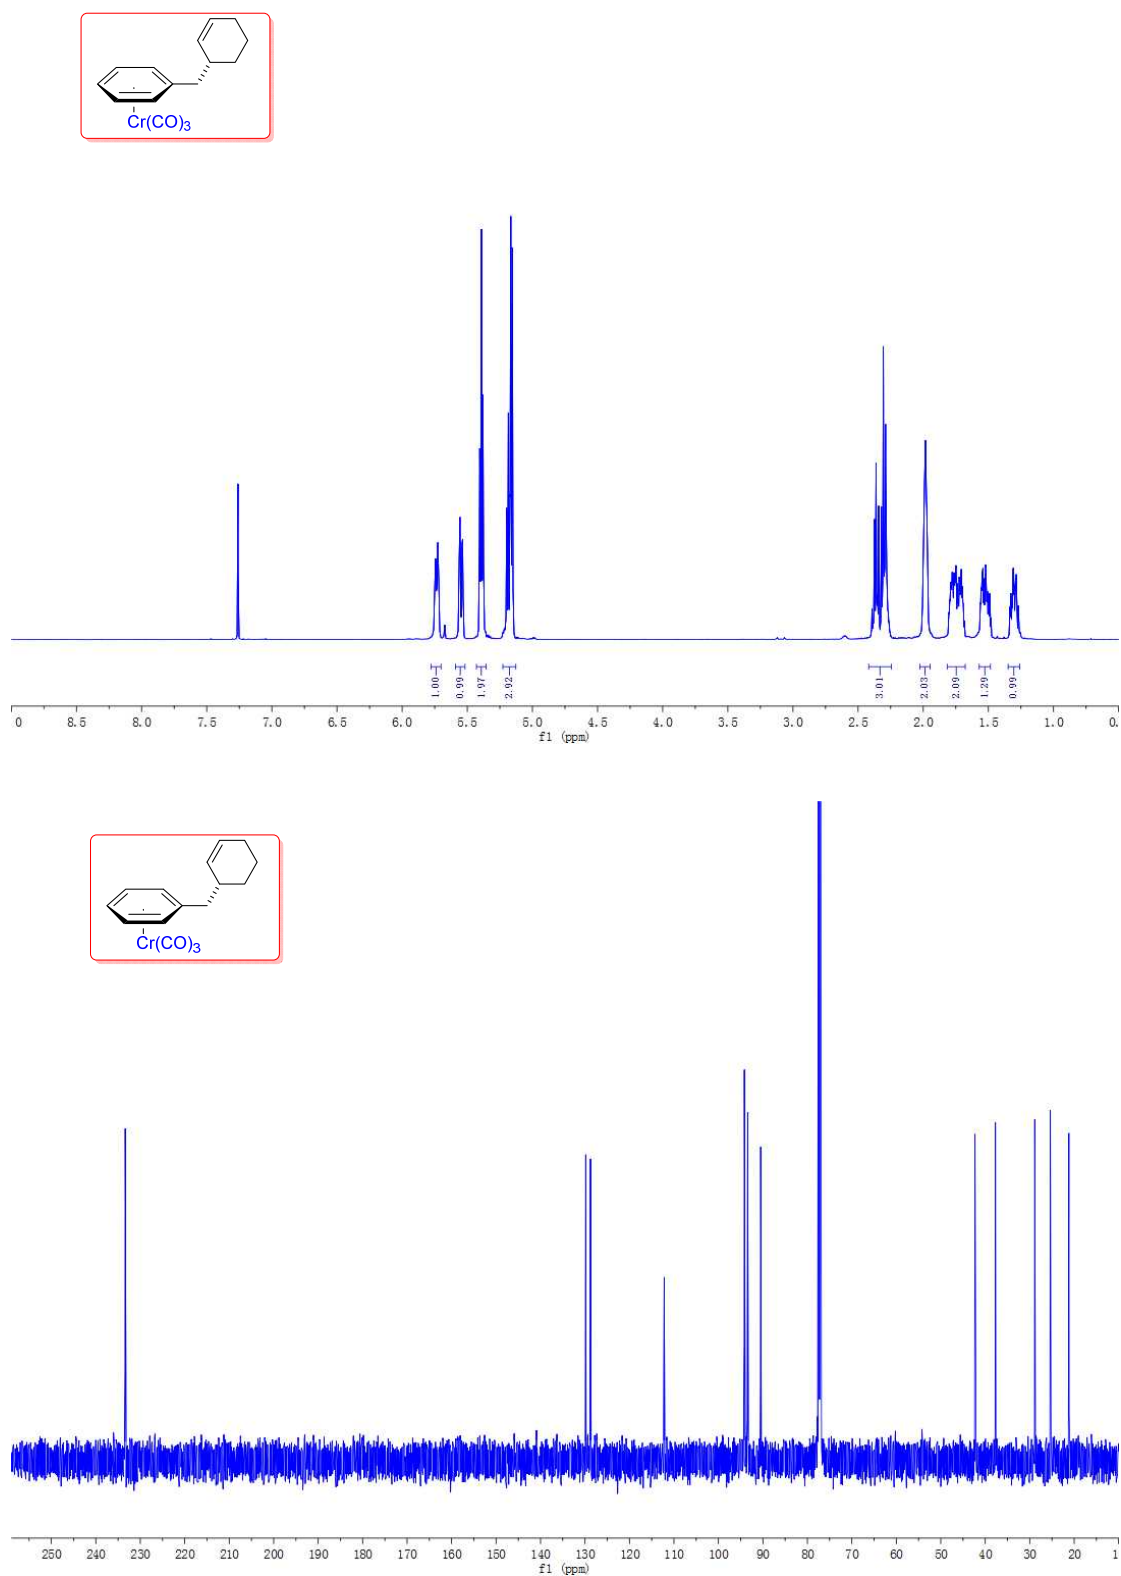

Figure S1. <sup>1</sup>H (500 MHz) and <sup>13</sup>C {<sup>1</sup>H} (125 MHz) NMR spectra of **3a** in CDCl<sub>3</sub>

(-)-( $\eta^6$ -(2-cyclohexen-1-ylmethyl)-4-(*p*-tolyl)-benzene)Cr(CO)<sub>3</sub> (**3b**)

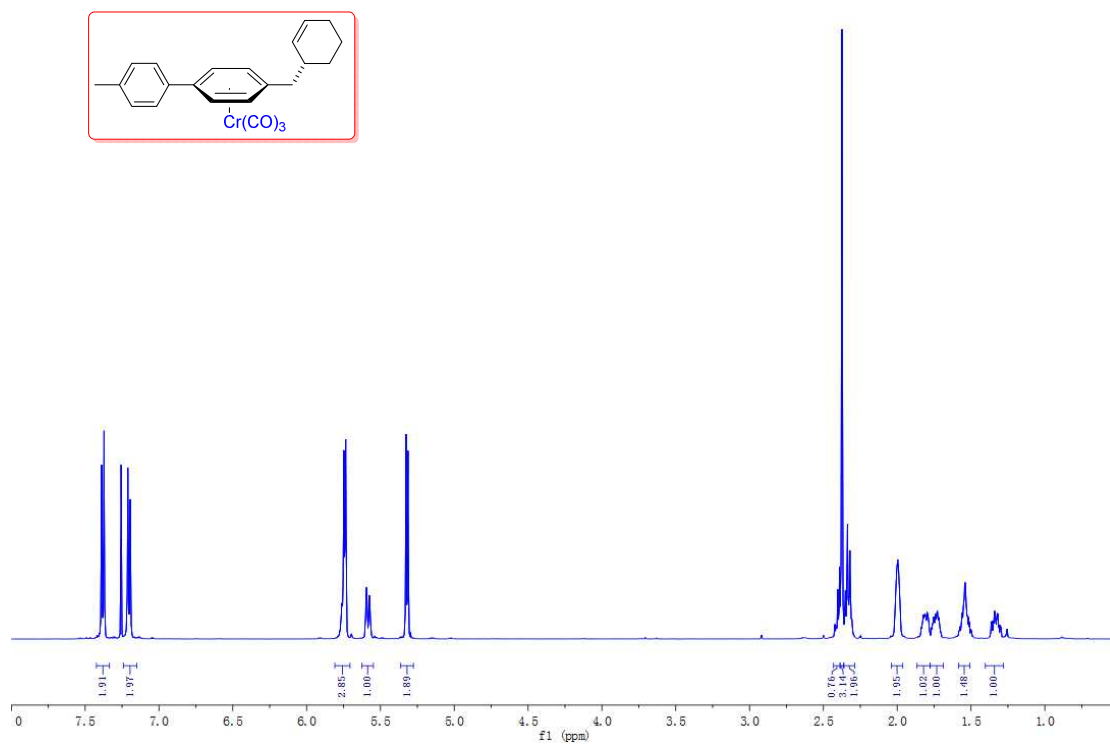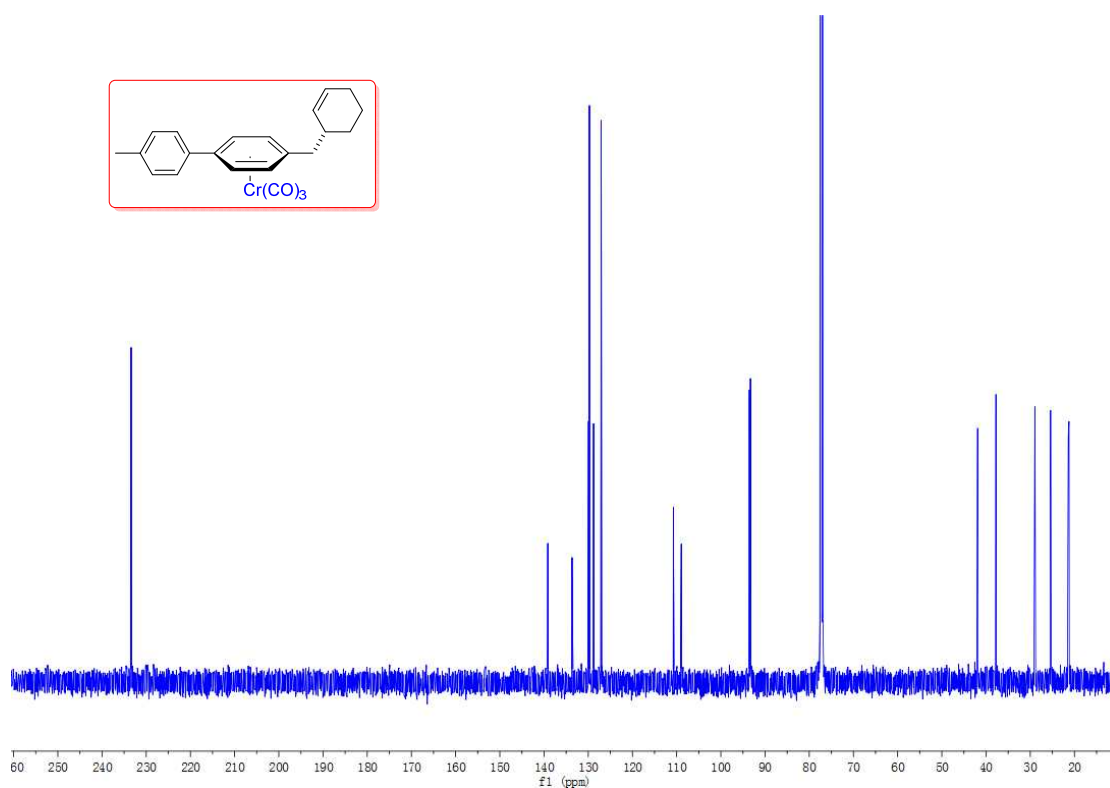

Figure S2. <sup>1</sup>H (500 MHz) and <sup>13</sup>C {<sup>1</sup>H} (125 MHz) NMR spectra of **3b** in CDCl<sub>3</sub>

**(-)-(η<sup>6</sup>-(2-cycloheptene-1-ylmethyl)-4-(*p*-tolyl)-benzene)Cr(CO)<sub>3</sub> (3c)**

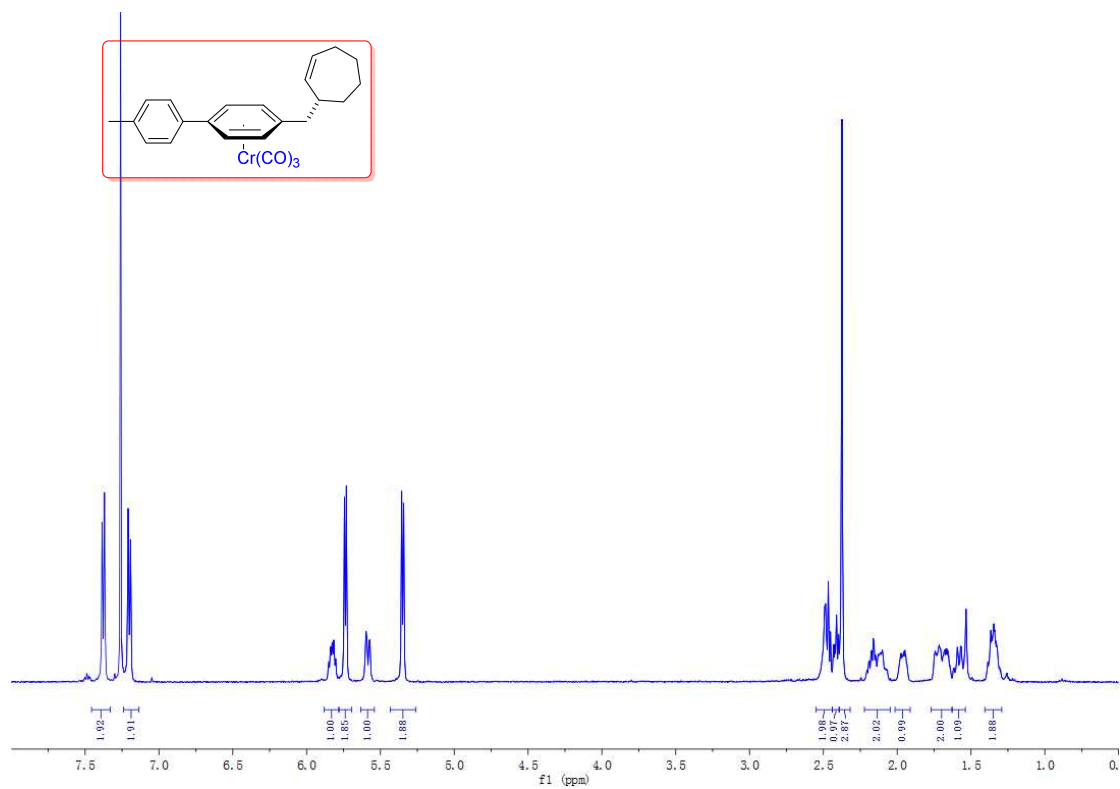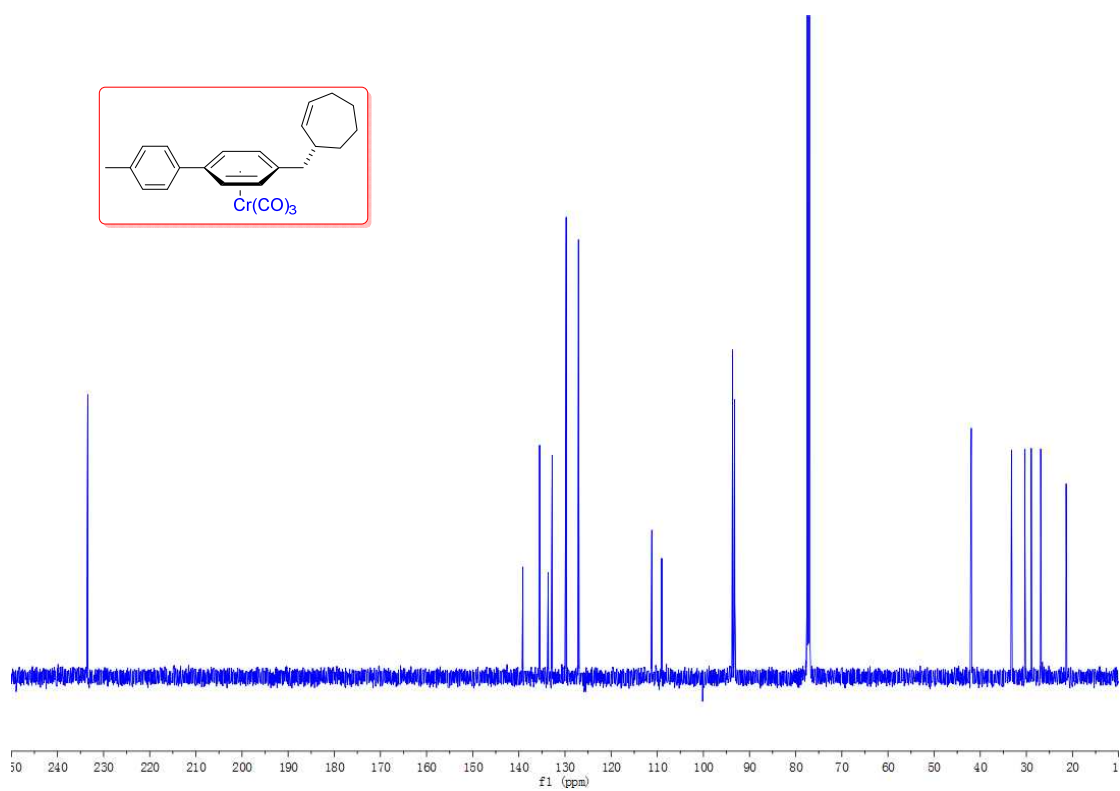

**Figure S3. <sup>1</sup>H (500 MHz) and <sup>13</sup>C {<sup>1</sup>H} (125 MHz) NMR spectra of 3c in CDCl<sub>3</sub>**

(-)-( $\eta^6$ -(2-cyclohexen-1-ylmethyl)-4-(2-pyridyl)-benzene)Cr(CO)<sub>3</sub> (3d)

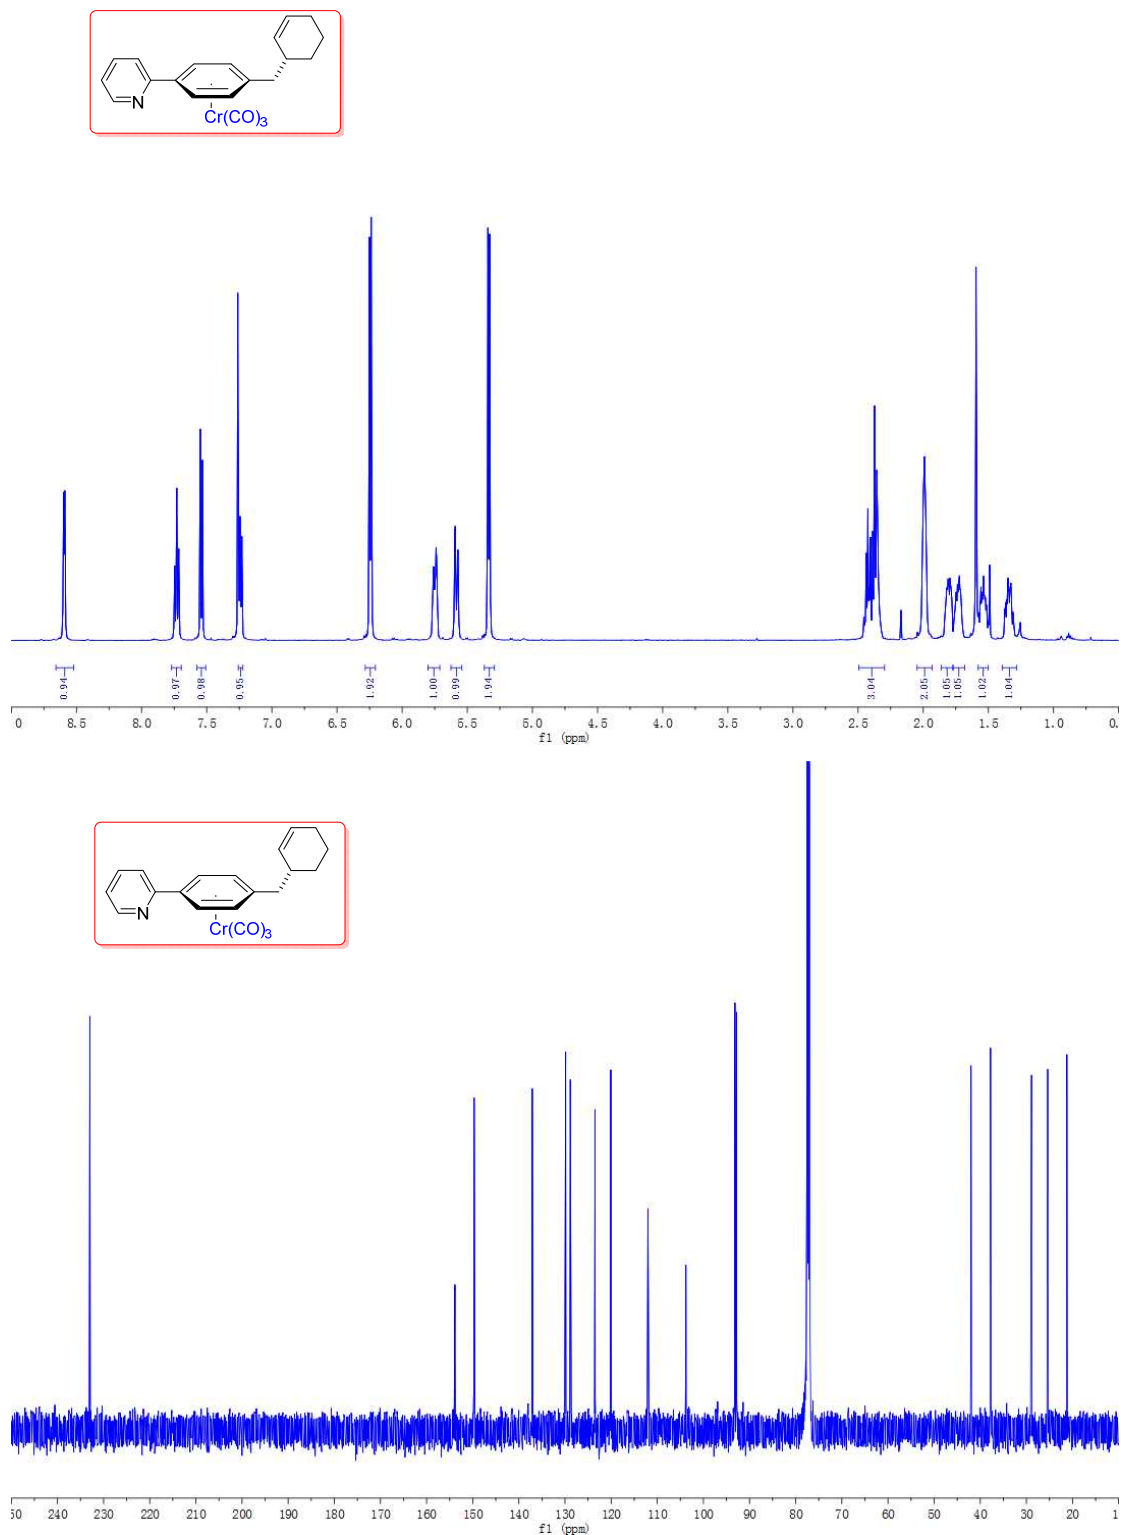

Figure S4. <sup>1</sup>H (500 MHz) and <sup>13</sup>C {<sup>1</sup>H} (125 MHz) NMR spectra of 3d in CDCl<sub>3</sub>



(-)-( $\eta^6$ -(2-cycloheptene-1-ylmethyl)-4-(2-pyridyl)-benzene)Cr(CO)<sub>3</sub> (**3e**)

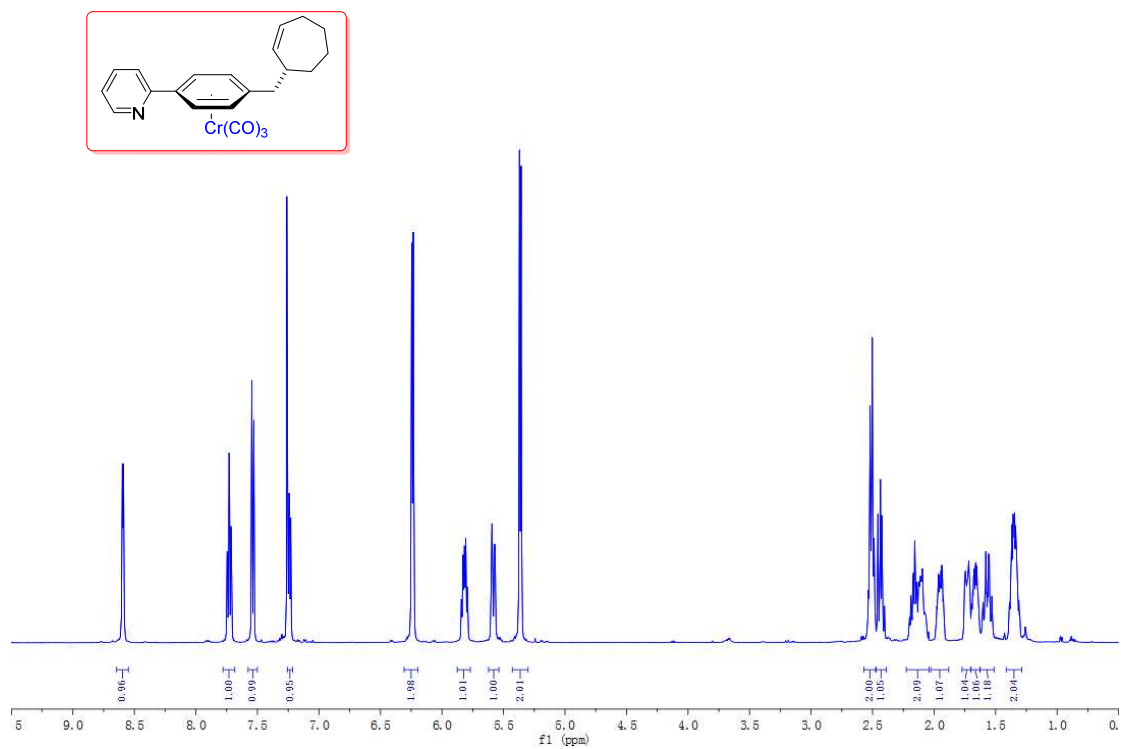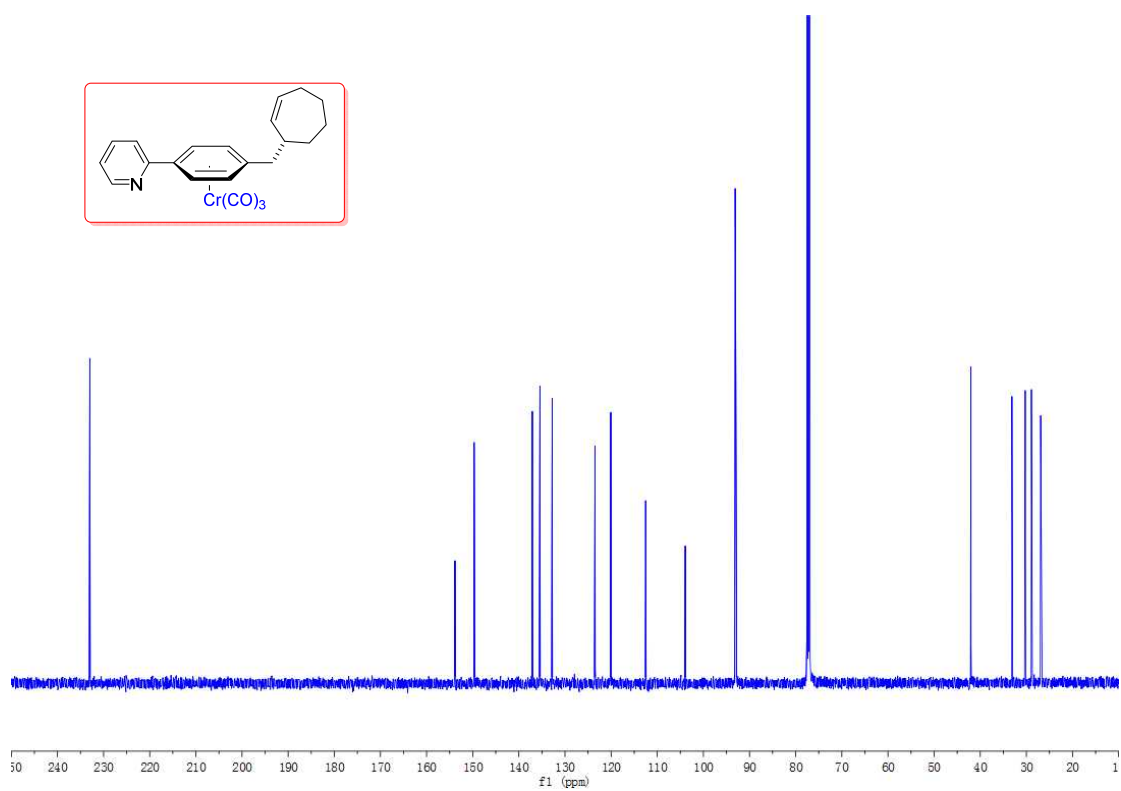

Figure S5. <sup>1</sup>H (500 MHz) and <sup>13</sup>C {<sup>1</sup>H} (125 MHz) NMR spectra of **3e** in CDCl<sub>3</sub>

(-)-(η<sup>6</sup>-(2-cyclohexen-1-ylmethyl)-4-(2-thiophenyl)-benzene)Cr(CO)<sub>3</sub> (**3f**)

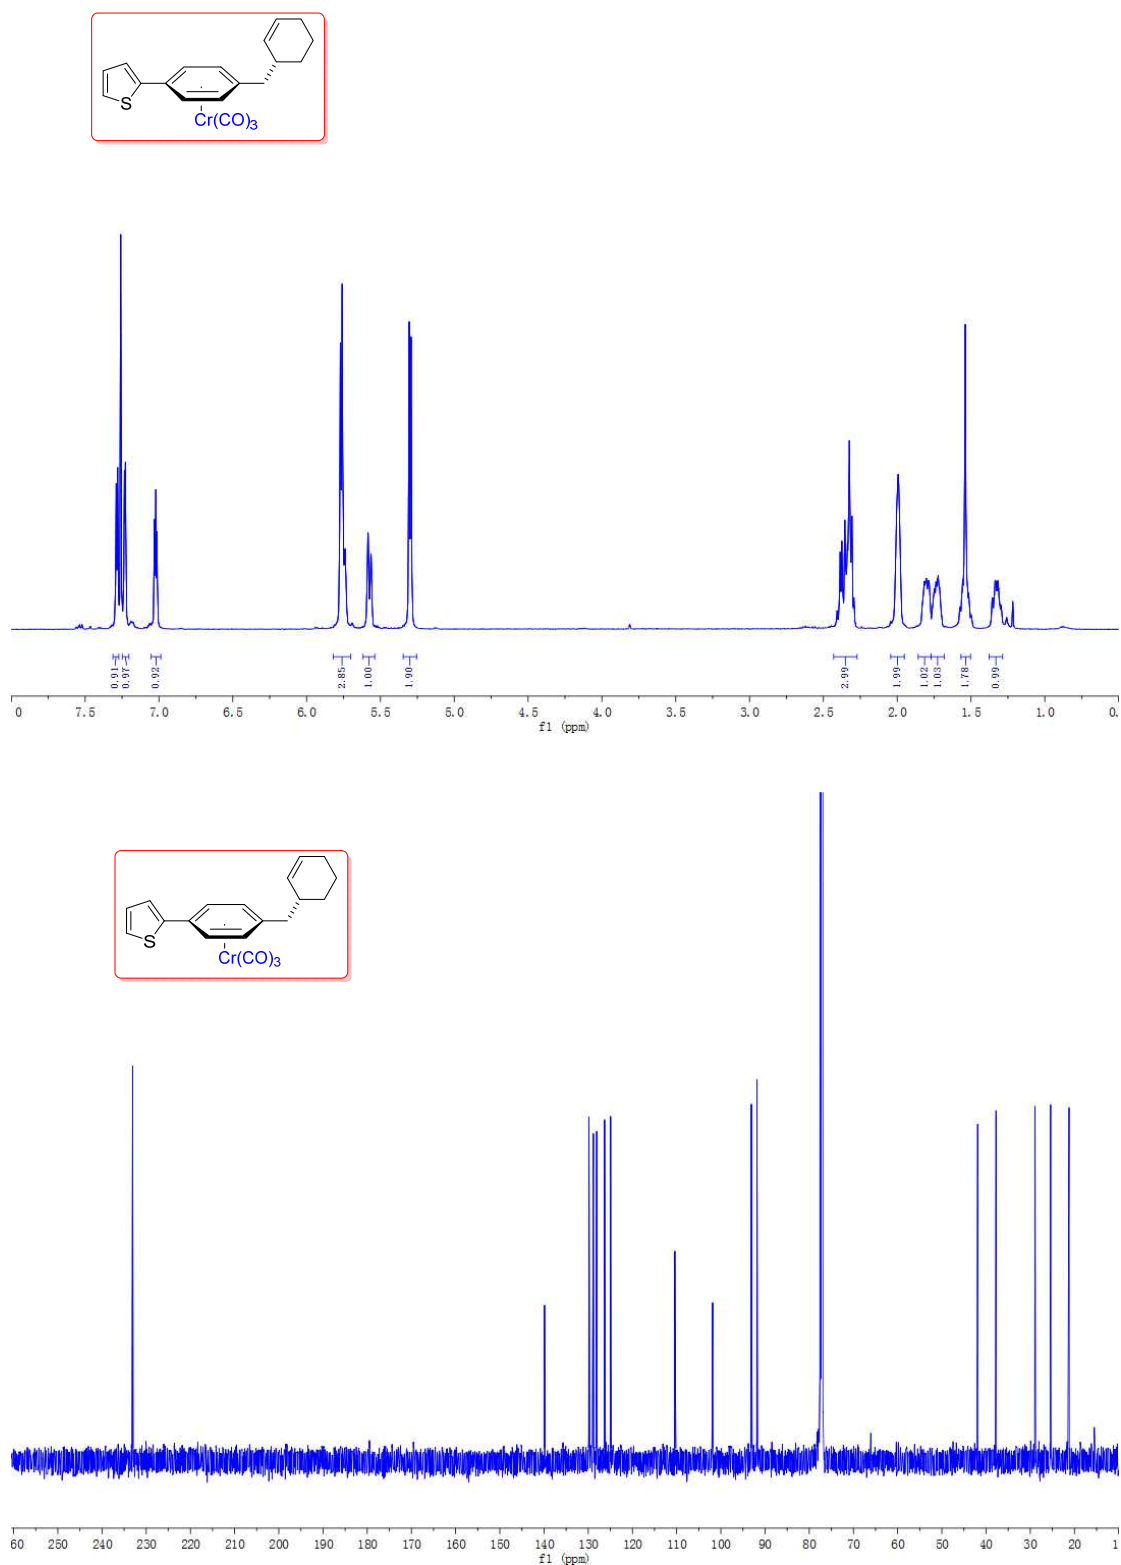

Figure S6. <sup>1</sup>H (500 MHz) and <sup>13</sup>C {<sup>1</sup>H} (125 MHz) NMR spectra of **3f** in CDCl<sub>3</sub>

(-)-(η<sup>6</sup>-(2-cycloheptene-1-ylmethyl)-4-(2-thiophenyl)-benzene)Cr(CO)<sub>3</sub> (3g)

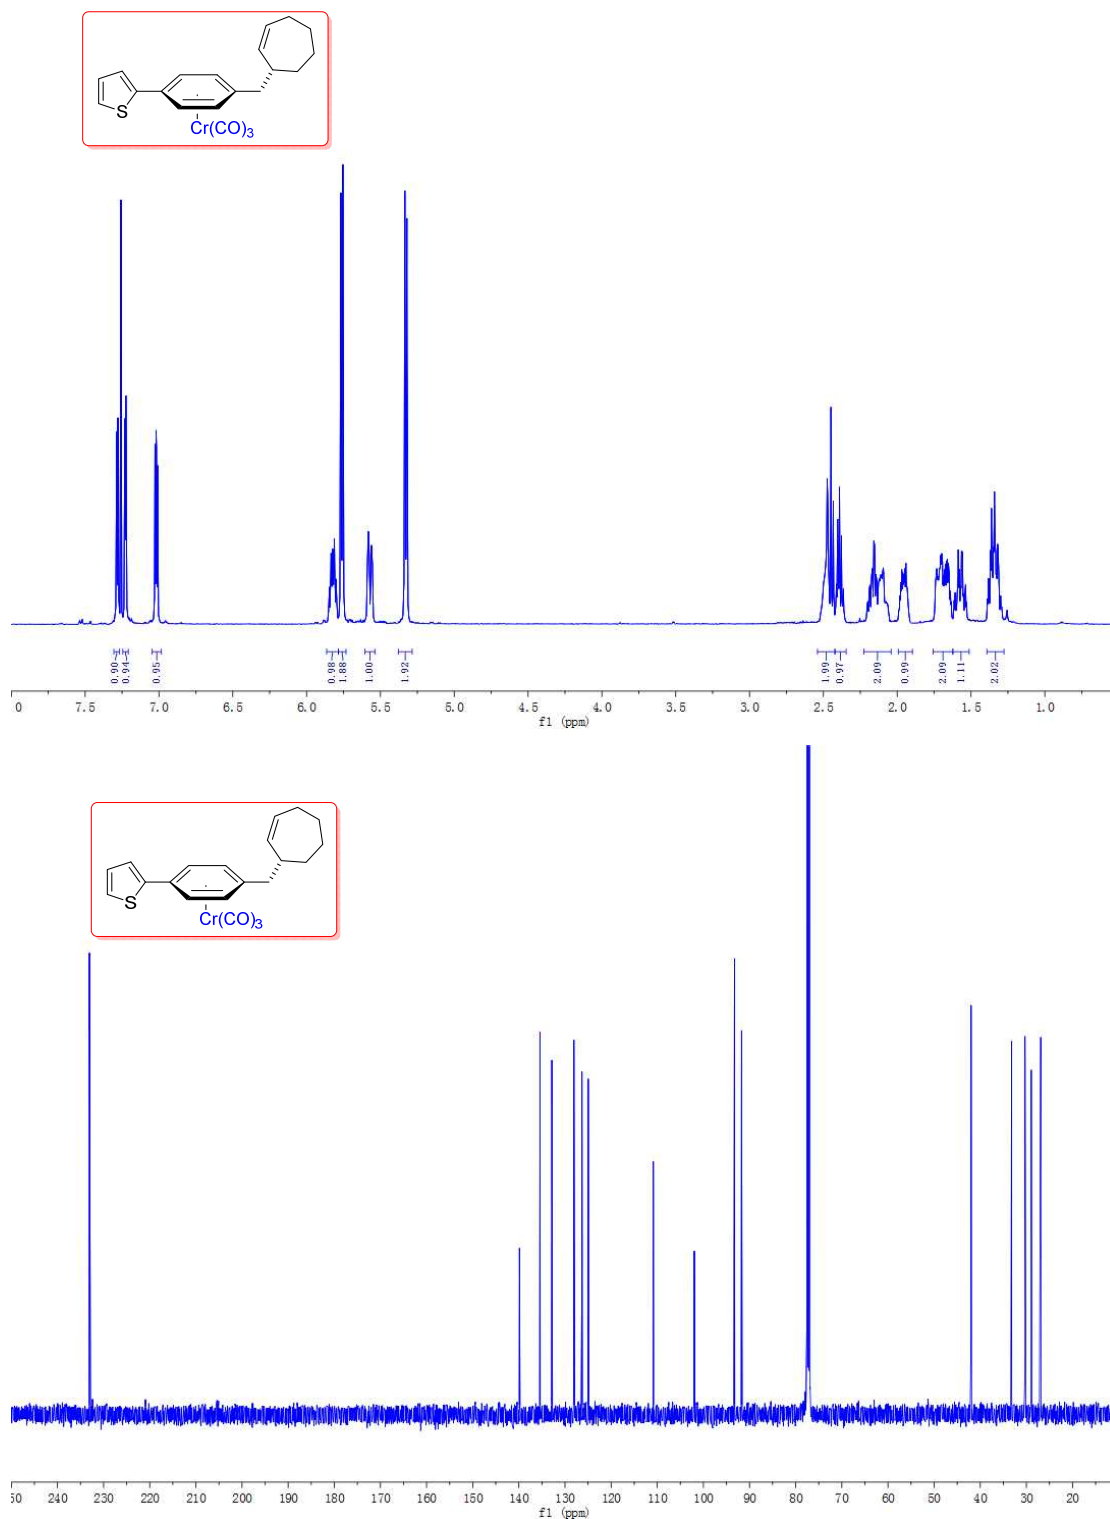

Figure S7. <sup>1</sup>H (500 MHz) and <sup>13</sup>C {<sup>1</sup>H} (125 MHz) NMR spectra of 3g in CDCl<sub>3</sub>

(-)-( $\eta^6$ -(2-cyclohexen-1-ylmethyl)-4-(*N*-pyrrolyl)-benzene)Cr(CO)<sub>3</sub> (**3h**)

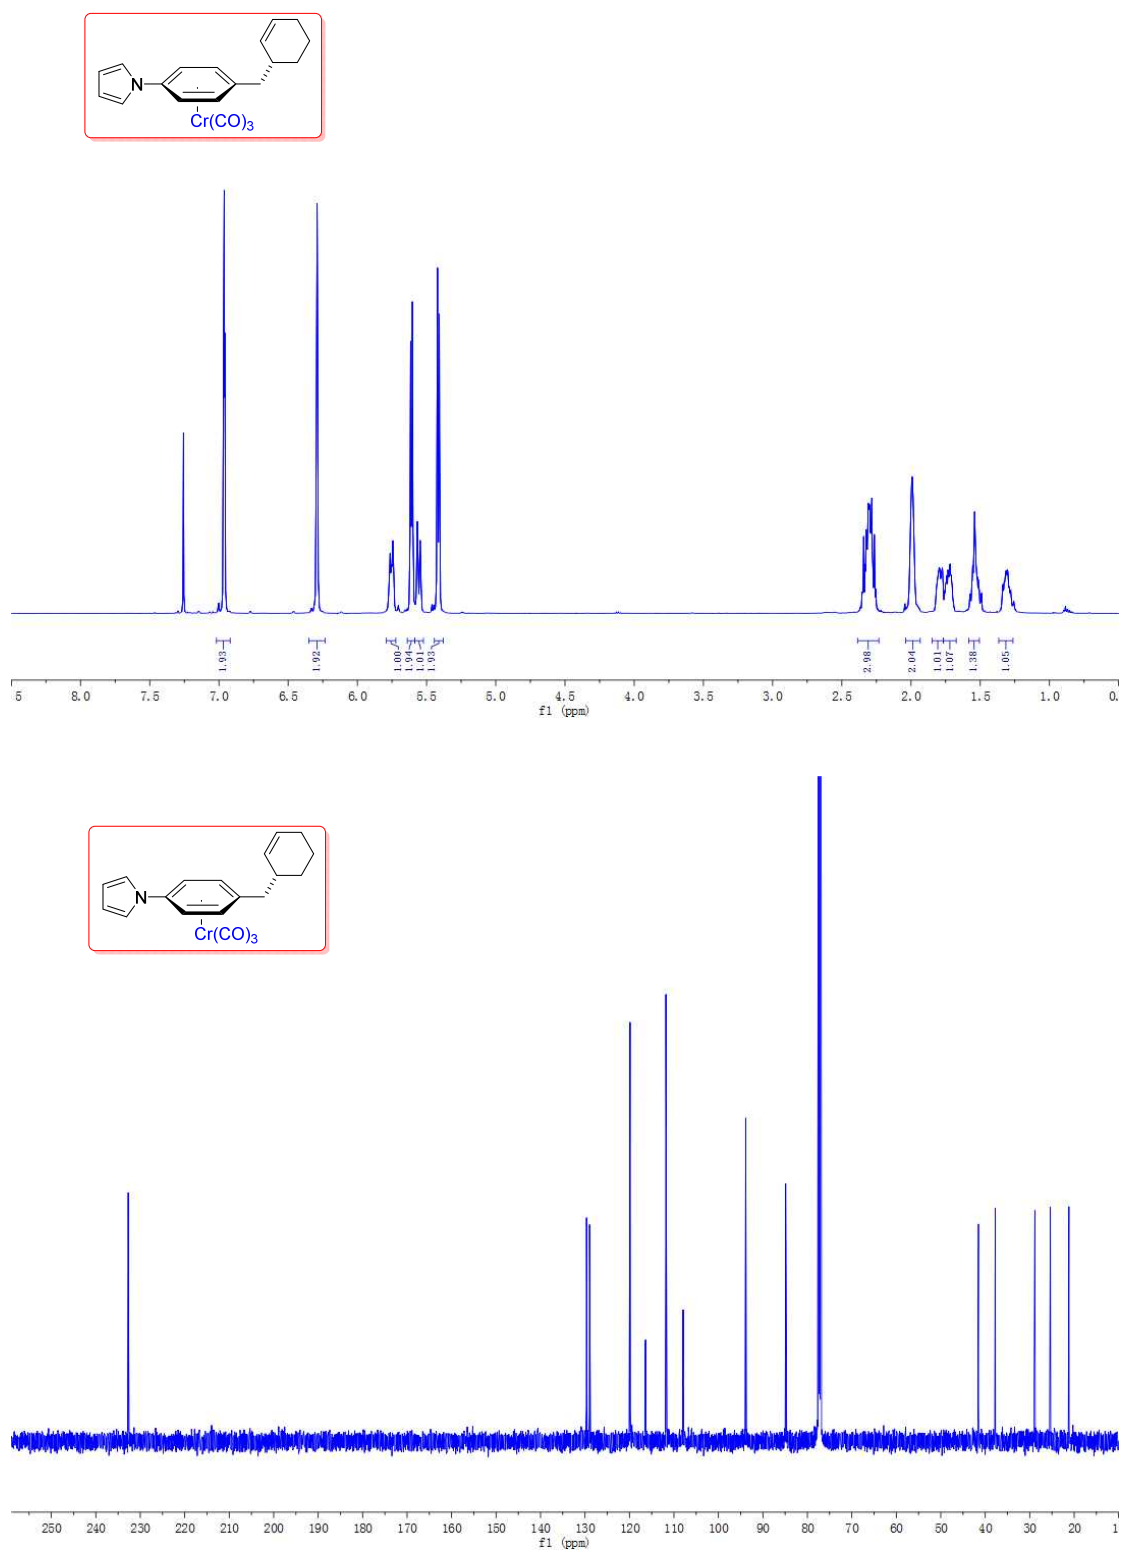

Figure S8. <sup>1</sup>H (500 MHz) and <sup>13</sup>C {<sup>1</sup>H} (125 MHz) NMR spectra of **3h** in CDCl<sub>3</sub>

**(-)-(η<sup>6</sup>-(2-cycloheptene-1-ylmethyl)-4-(*N*-pyrrolyl)-benzene)Cr(CO)<sub>3</sub> (**3i**)**

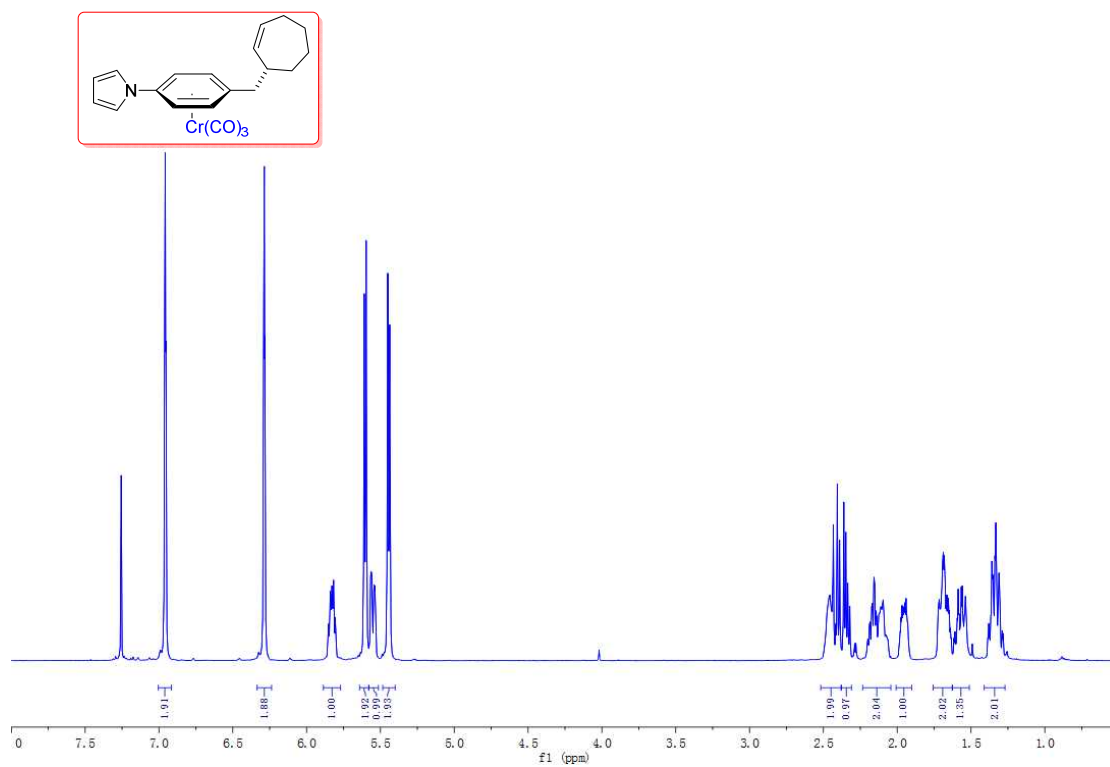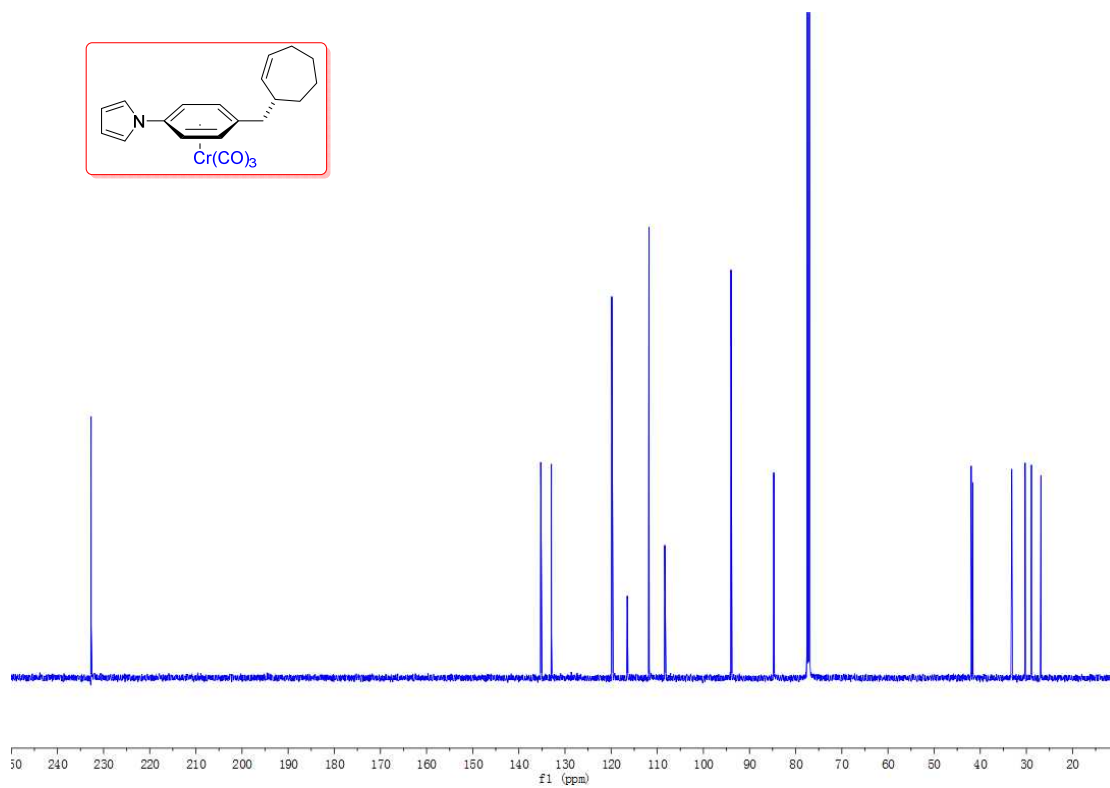

**Figure S9. <sup>1</sup>H (500 MHz) and <sup>13</sup>C {<sup>1</sup>H} (125 MHz) NMR spectra of **3i** in CDCl<sub>3</sub>**

**(-)-(η<sup>6</sup>-(2-cyclohexen-1-ylmethyl)-4-(*p*-chlorophenyl)-benzene)Cr(CO)<sub>3</sub> (3j)**

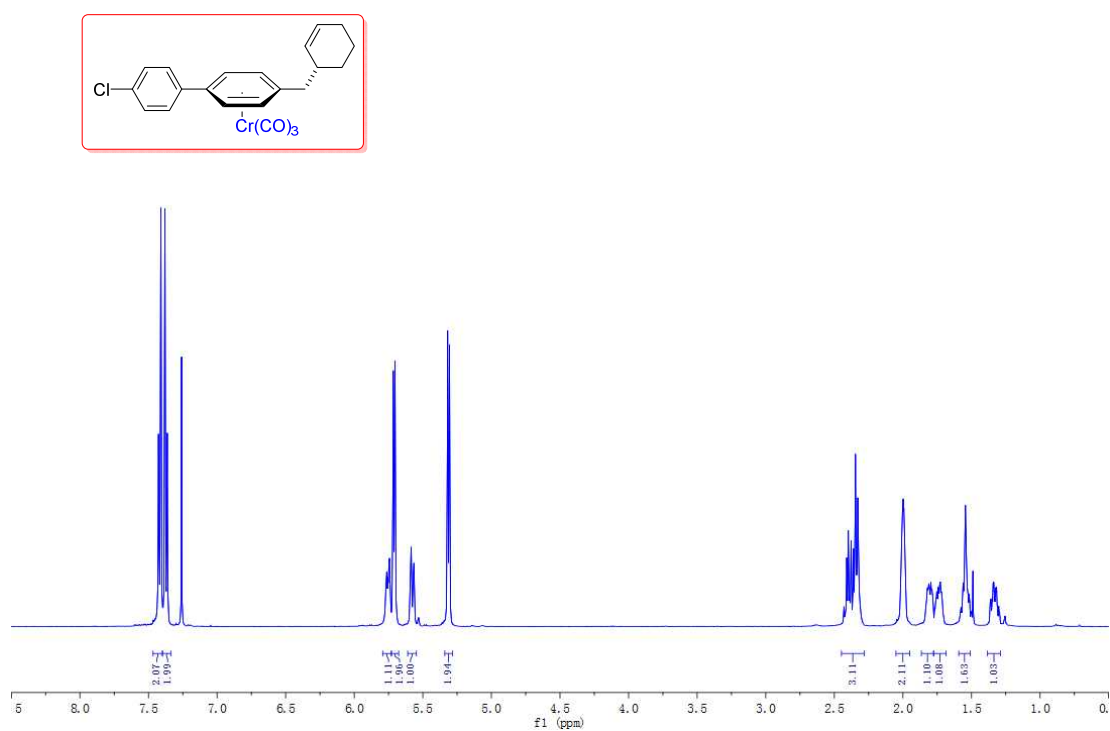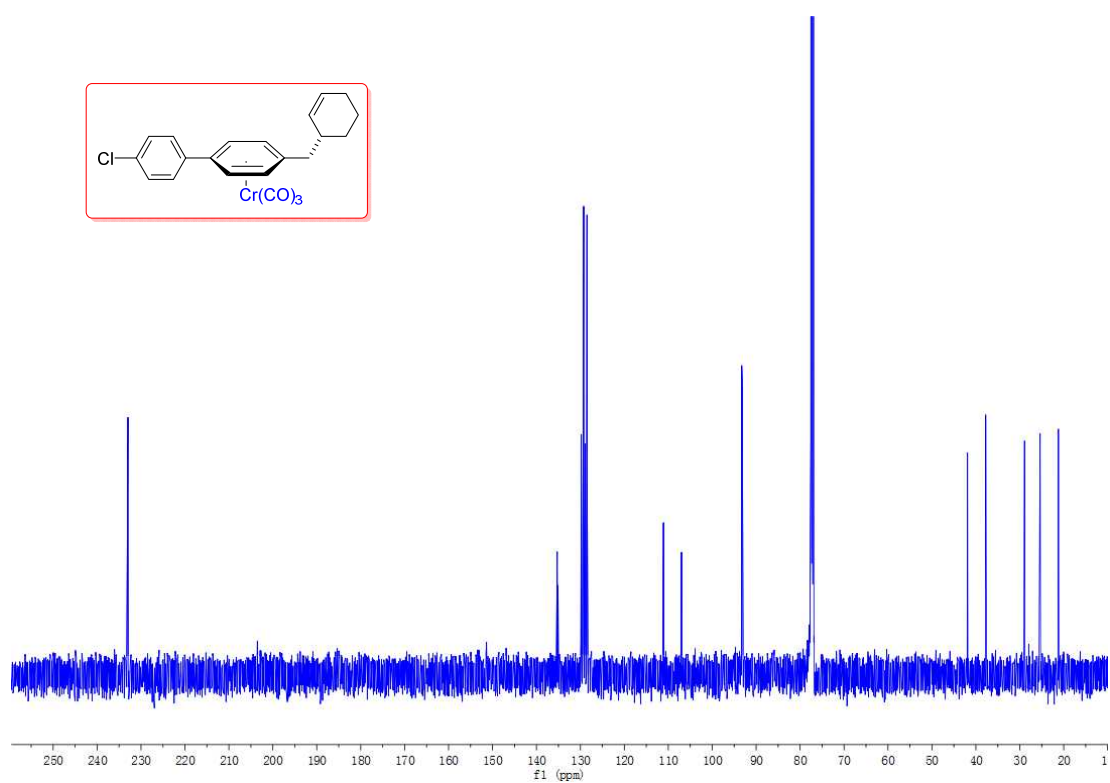

**Figure S10.** <sup>1</sup>H (500 MHz) and <sup>13</sup>C {<sup>1</sup>H} (125 MHz) NMR spectra of 3j in CDCl<sub>3</sub>

**(-)-(η<sup>6</sup>-(2-cyclohexen-1-ylmethyl)-4-(*p*-trifluoromethylphenyl)-benzene)Cr(CO)<sub>3</sub> (3k)**

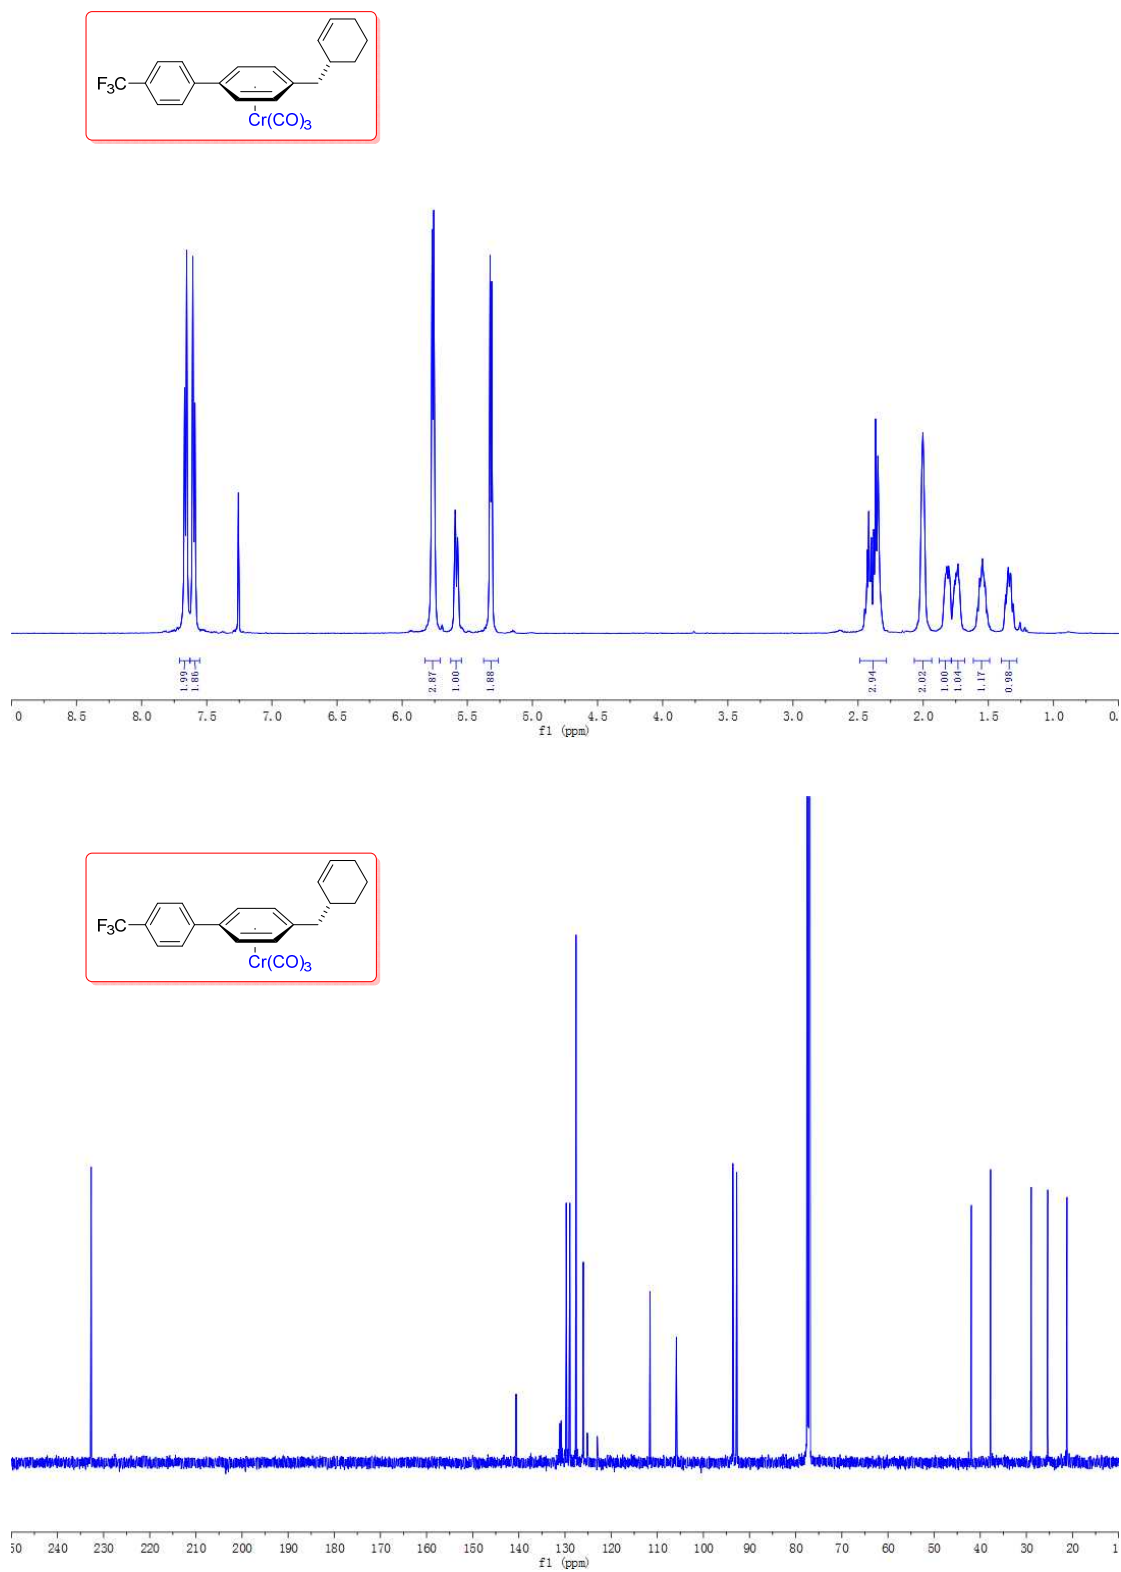

**Figure S11.** <sup>1</sup>H (500 MHz) and <sup>13</sup>C {<sup>1</sup>H} (125 MHz) NMR spectra of 3k in CDCl<sub>3</sub>

**(-)-(η<sup>6</sup>-(2-cyclohexen-1-ylmethyl)-4-chloro-benzene)Cr(CO)<sub>3</sub> (31)**

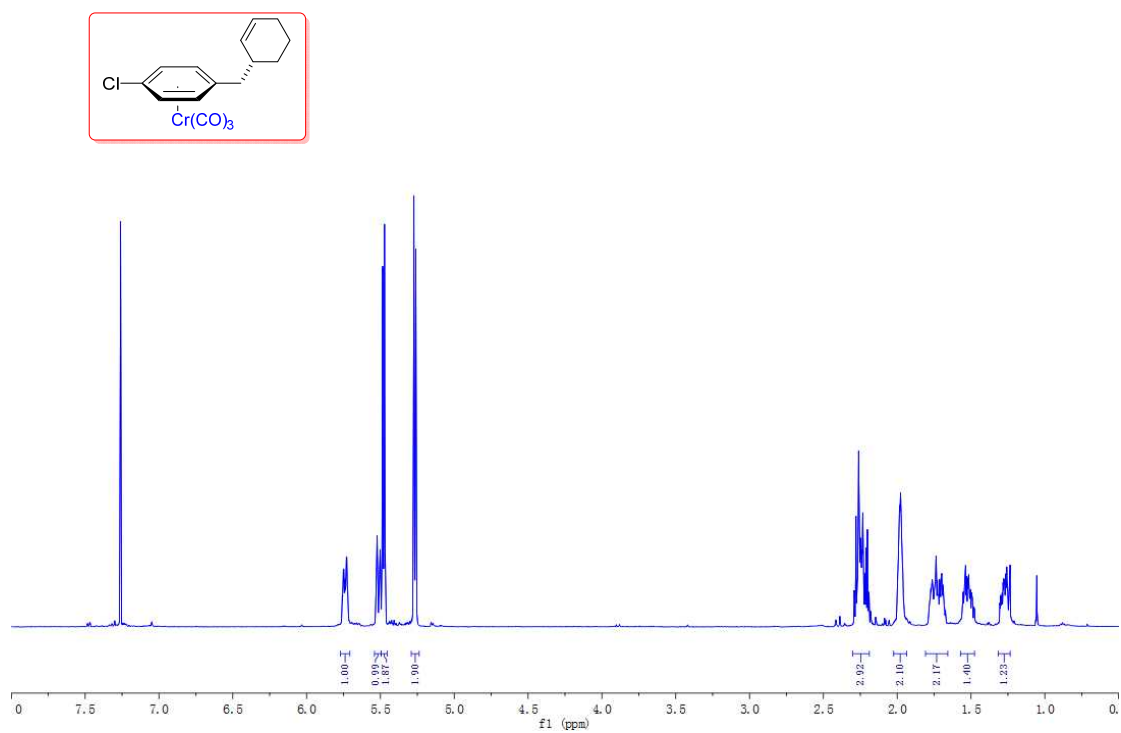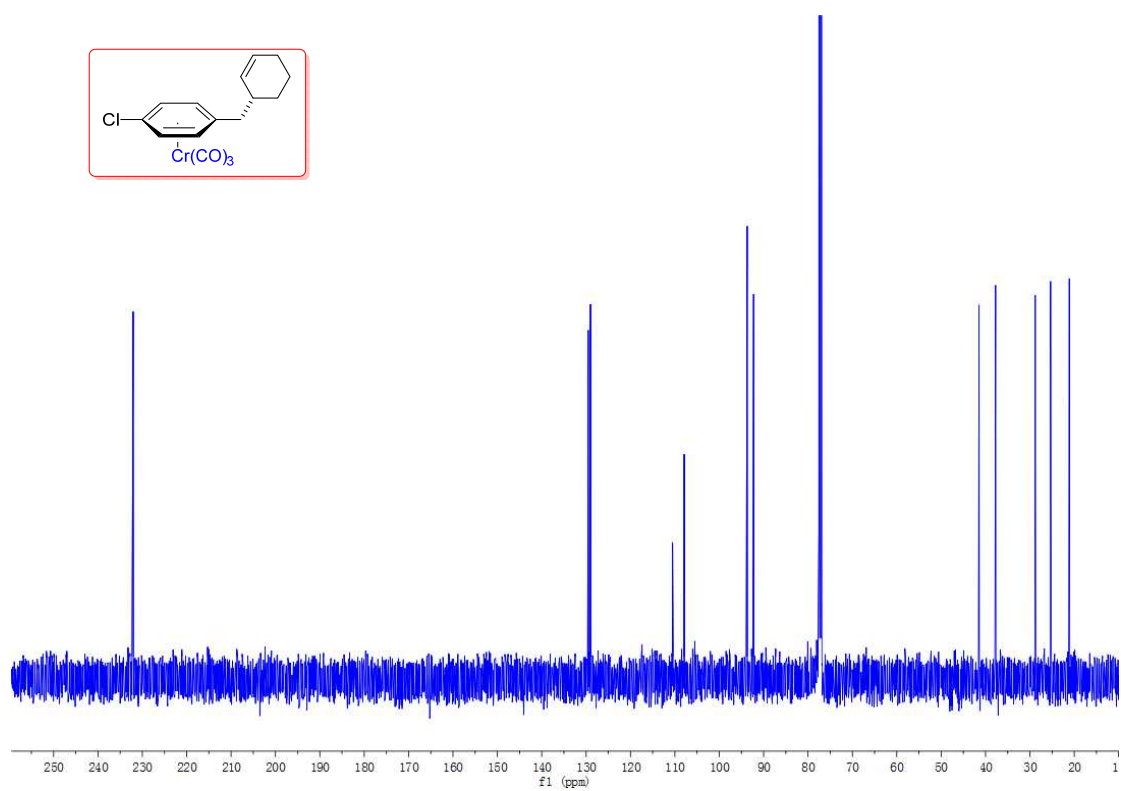

**Figure S12.** <sup>1</sup>H (500 MHz) and <sup>13</sup>C {<sup>1</sup>H} (125 MHz) NMR spectra of 31 in CDCl<sub>3</sub>



**(-)-(2-cyclohexen-1-ylmethyl)-3-chlorobenzene (3m)**

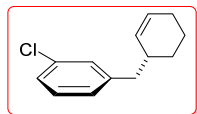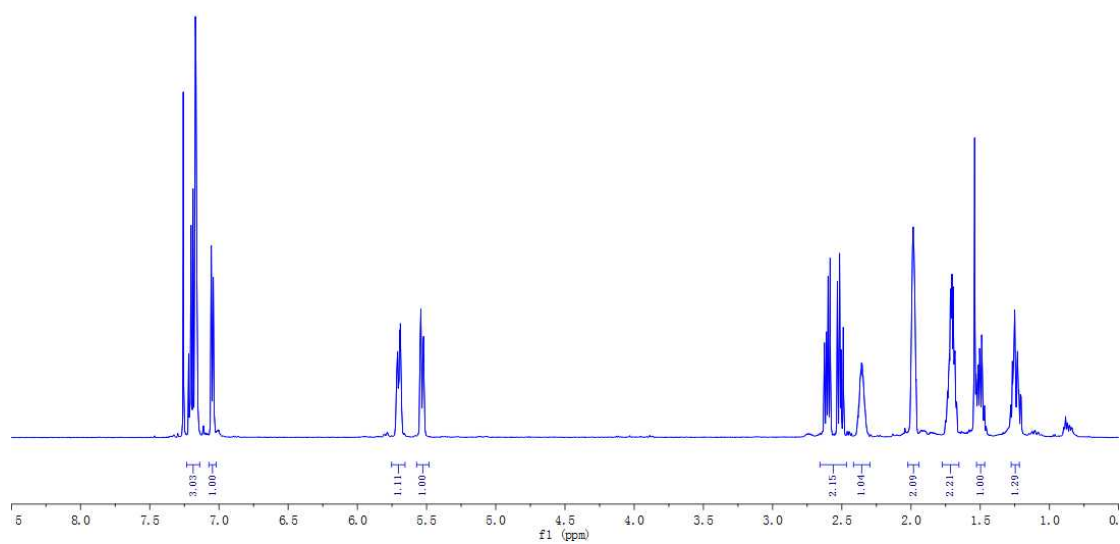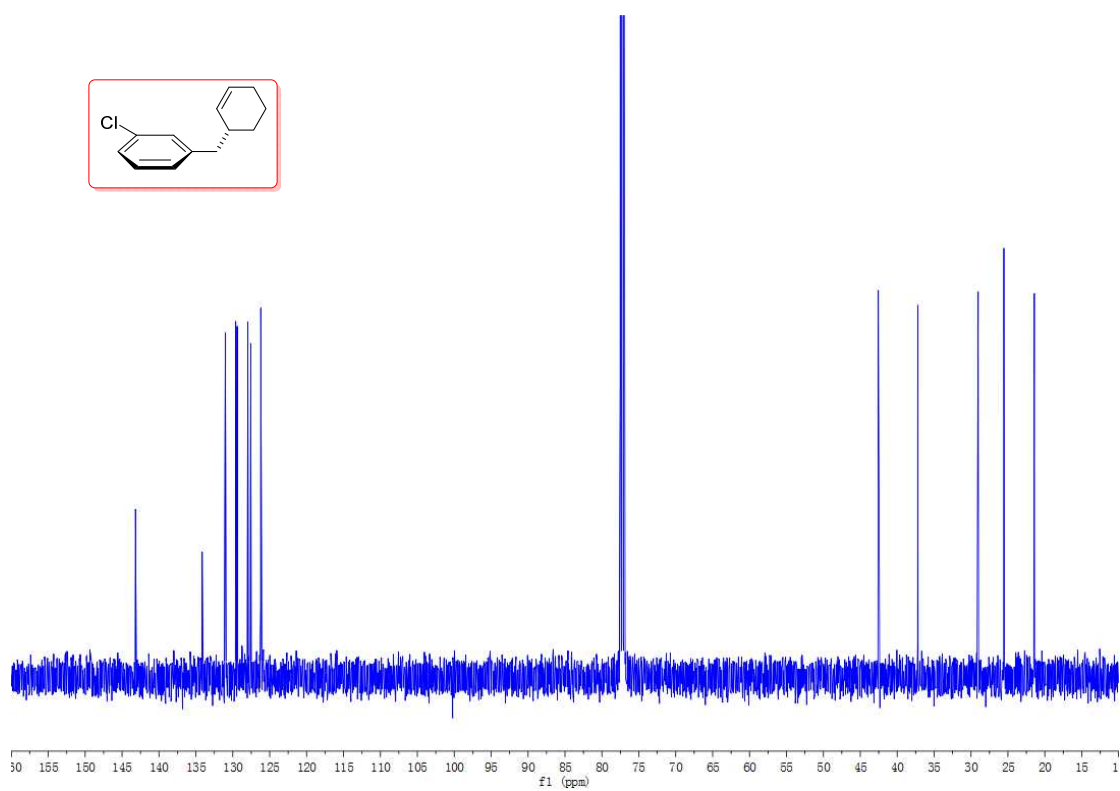

**Figure S13.**  $^1\text{H}$  (500 MHz) and  $^{13}\text{C}$   $\{^1\text{H}\}$  (125 MHz) NMR spectra of 3m in  $\text{CDCl}_3$

**(-)-(2-cyclohexen-1-ylmethyl)-3-methoxybenzene (3n)**

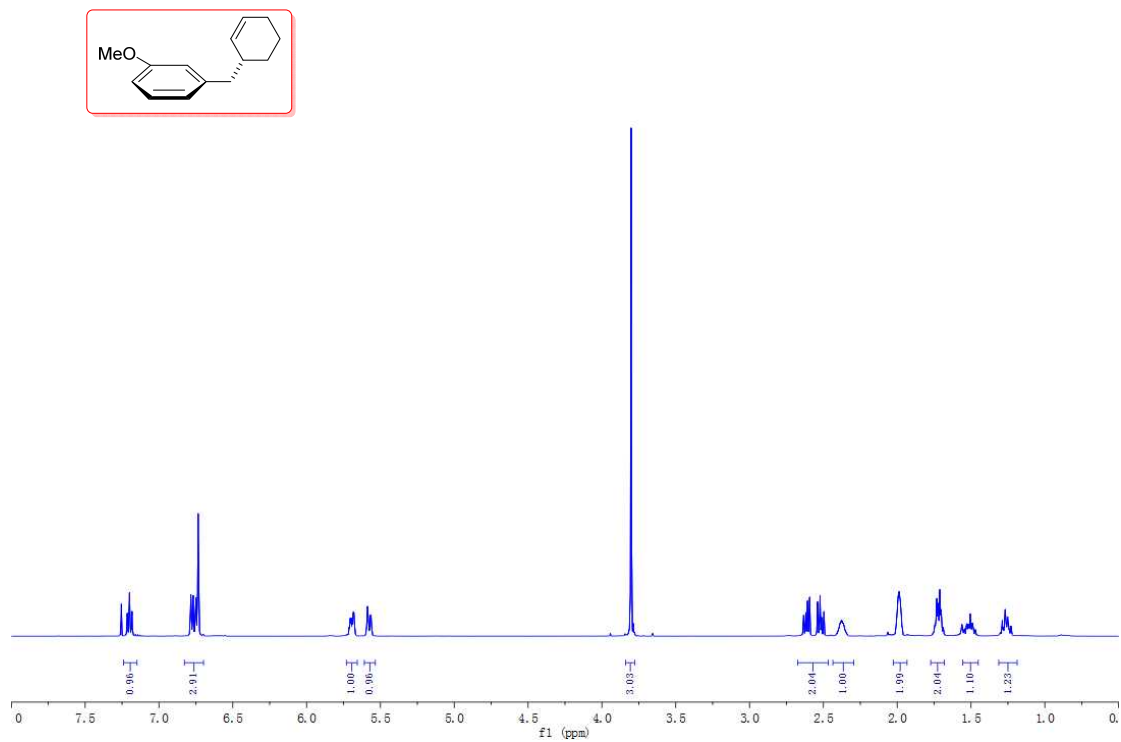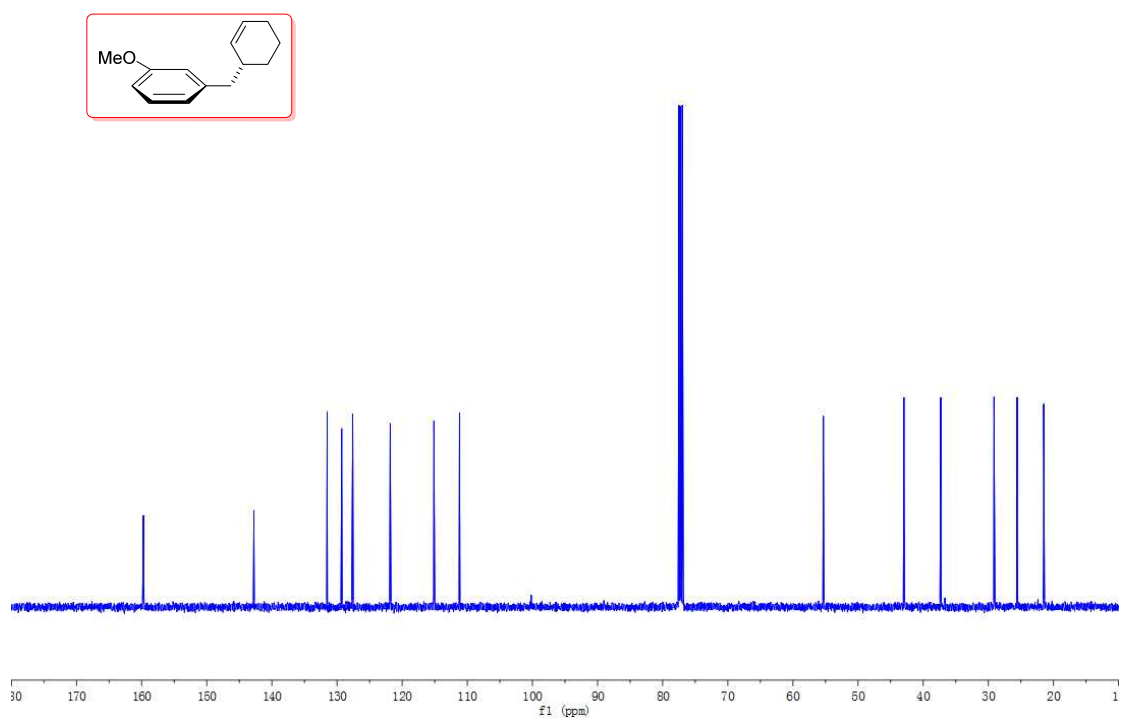

**Figure S14.**  $^1\text{H}$  (500 MHz) and  $^{13}\text{C}$  { $^1\text{H}$ } (125 MHz) NMR spectra of 3n in  $\text{CDCl}_3$

**(-)-(2-cyclohexen-1-ylmethyl)-4-(2-pyridyl)-benzene (3o)**

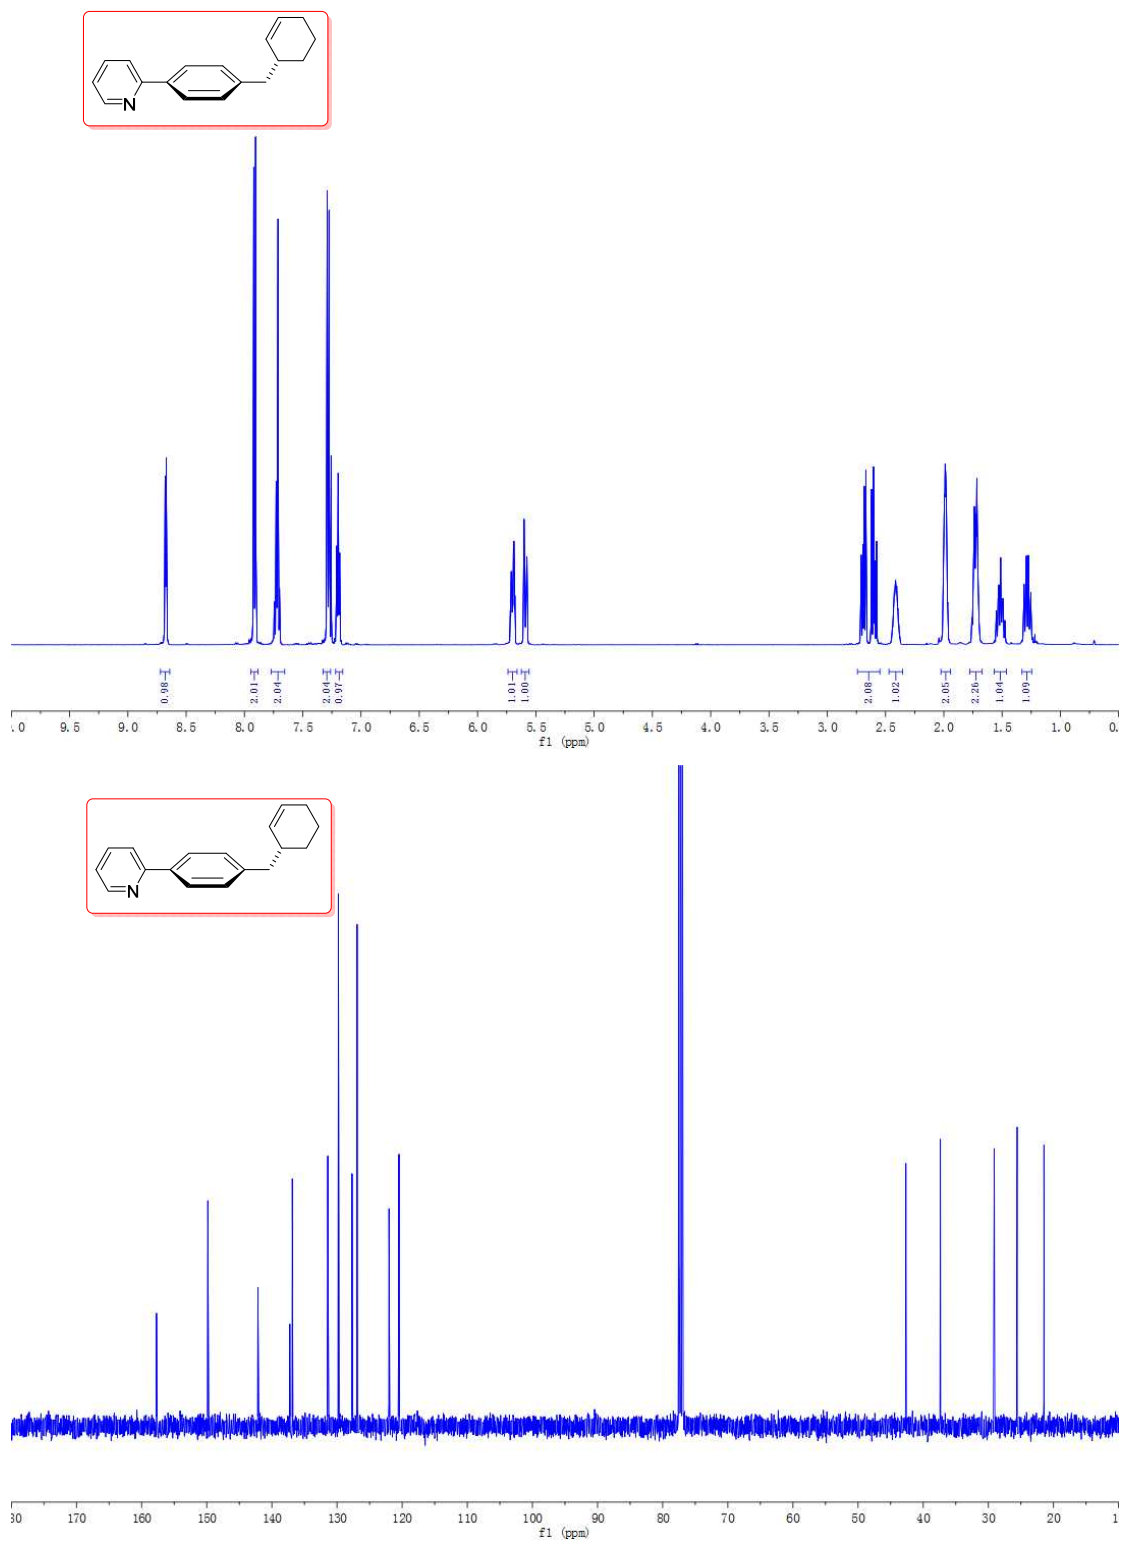

**Figure S15.**  $^1\text{H}$  (500 MHz) and  $^{13}\text{C}$   $\{^1\text{H}\}$  (125 MHz) NMR spectra of 3o in  $\text{CDCl}_3$

**(-)-3-(diphenylmethyl)-1-cyclohexene (3p)**

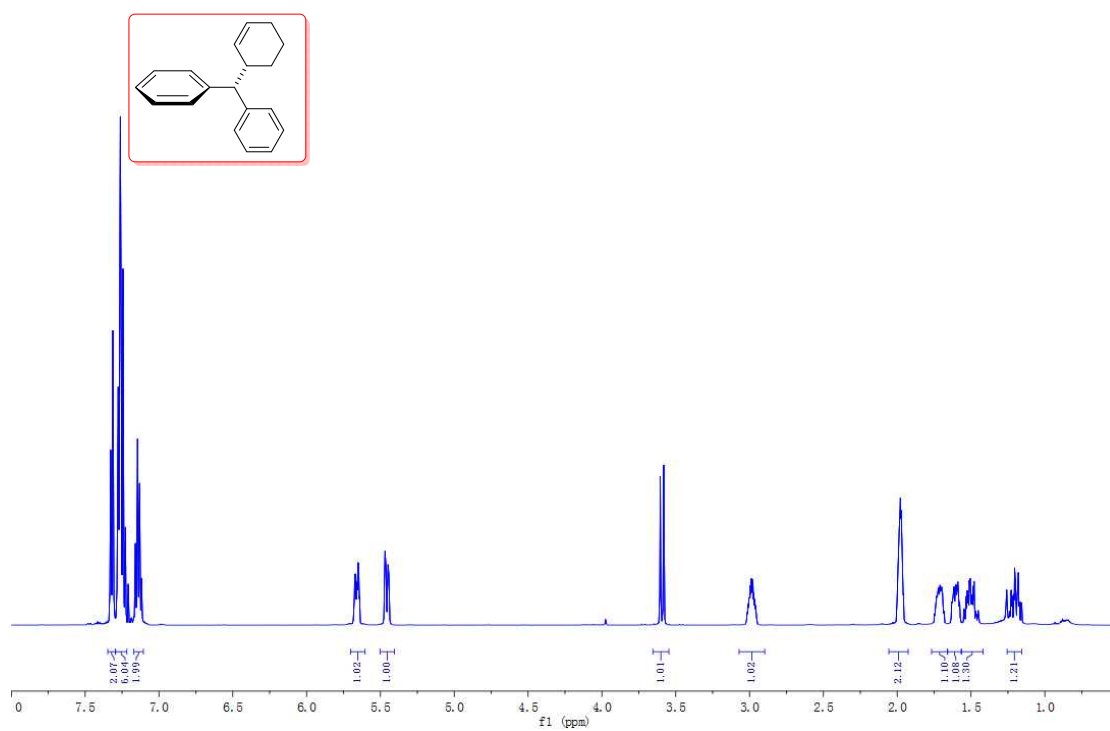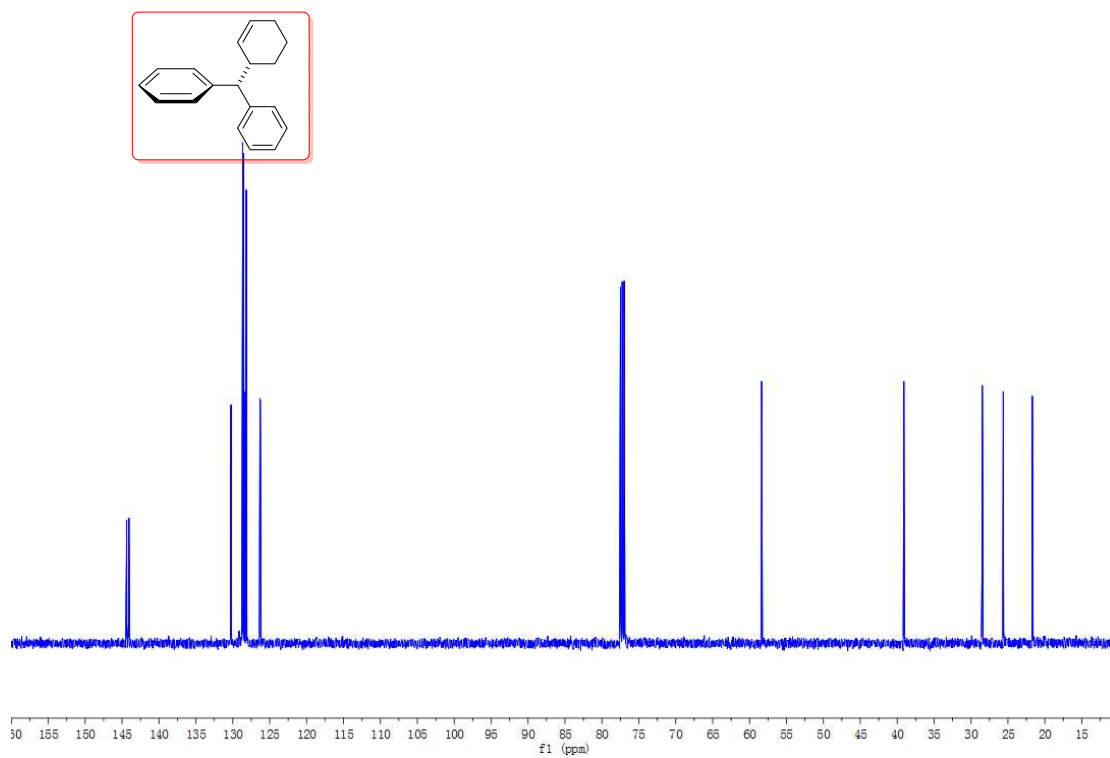

**Figure S16.**  $^1\text{H}$  (500 MHz) and  $^{13}\text{C}$   $\{^1\text{H}\}$  (125 MHz) NMR spectra of 3p in  $\text{CDCl}_3$

**(-)-4-(cyclohex-2-en-1-yl(phenyl)methyl)morpholine (3q)**

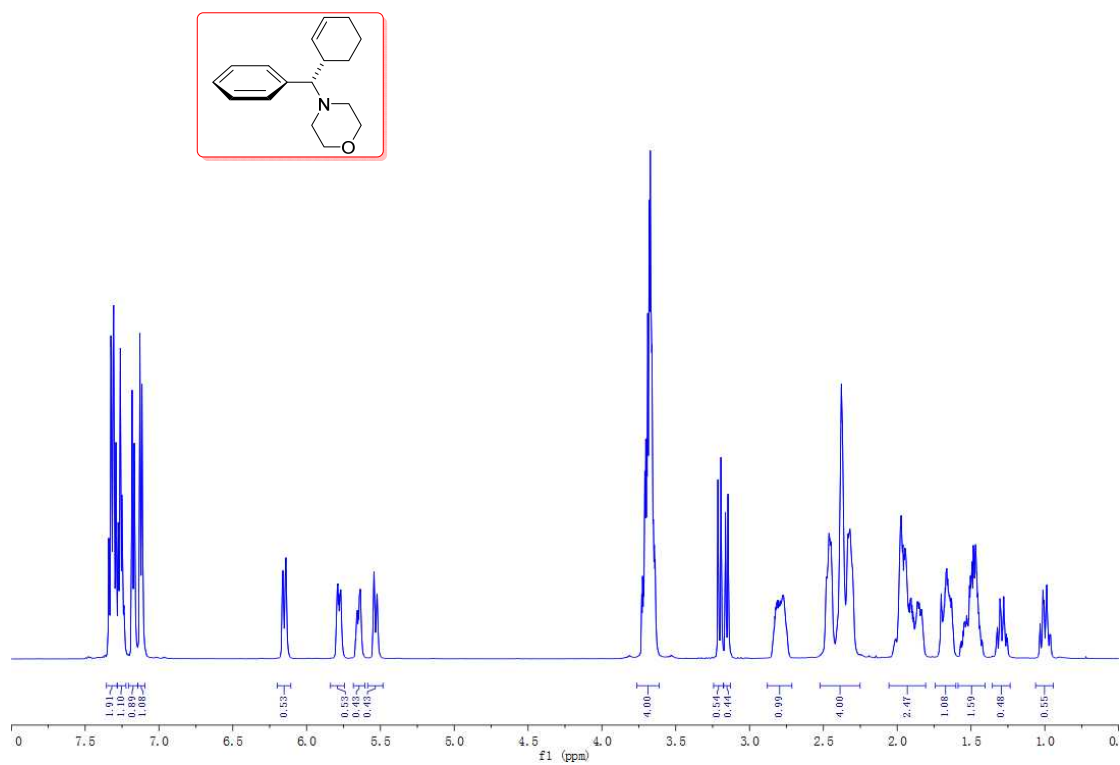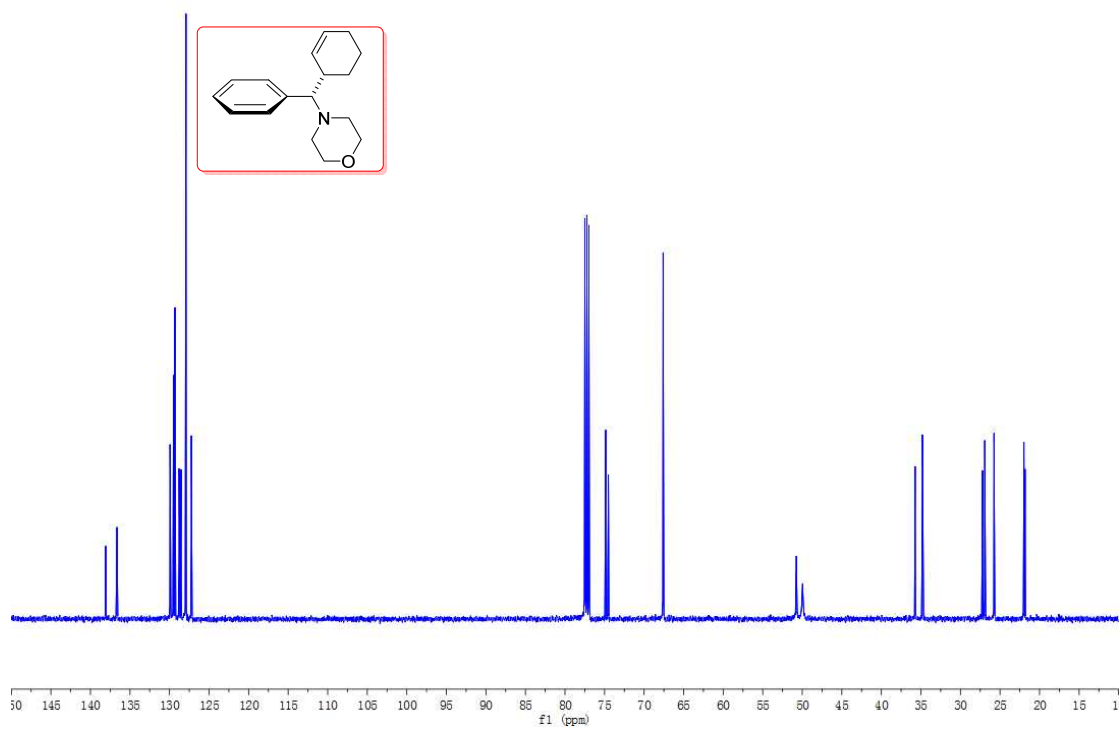

**Figure S17.**  $^1\text{H}$  (500 MHz) and  $^{13}\text{C}$   $\{^1\text{H}\}$  (125 MHz) NMR spectra of 3q in  $\text{CDCl}_3$

**(E)-(η<sup>6</sup>-(2,4-diphenylbut-3-en-1-yl)-4-(2-pyridyl)-benzene)Cr(CO)<sub>3</sub> (3r)**

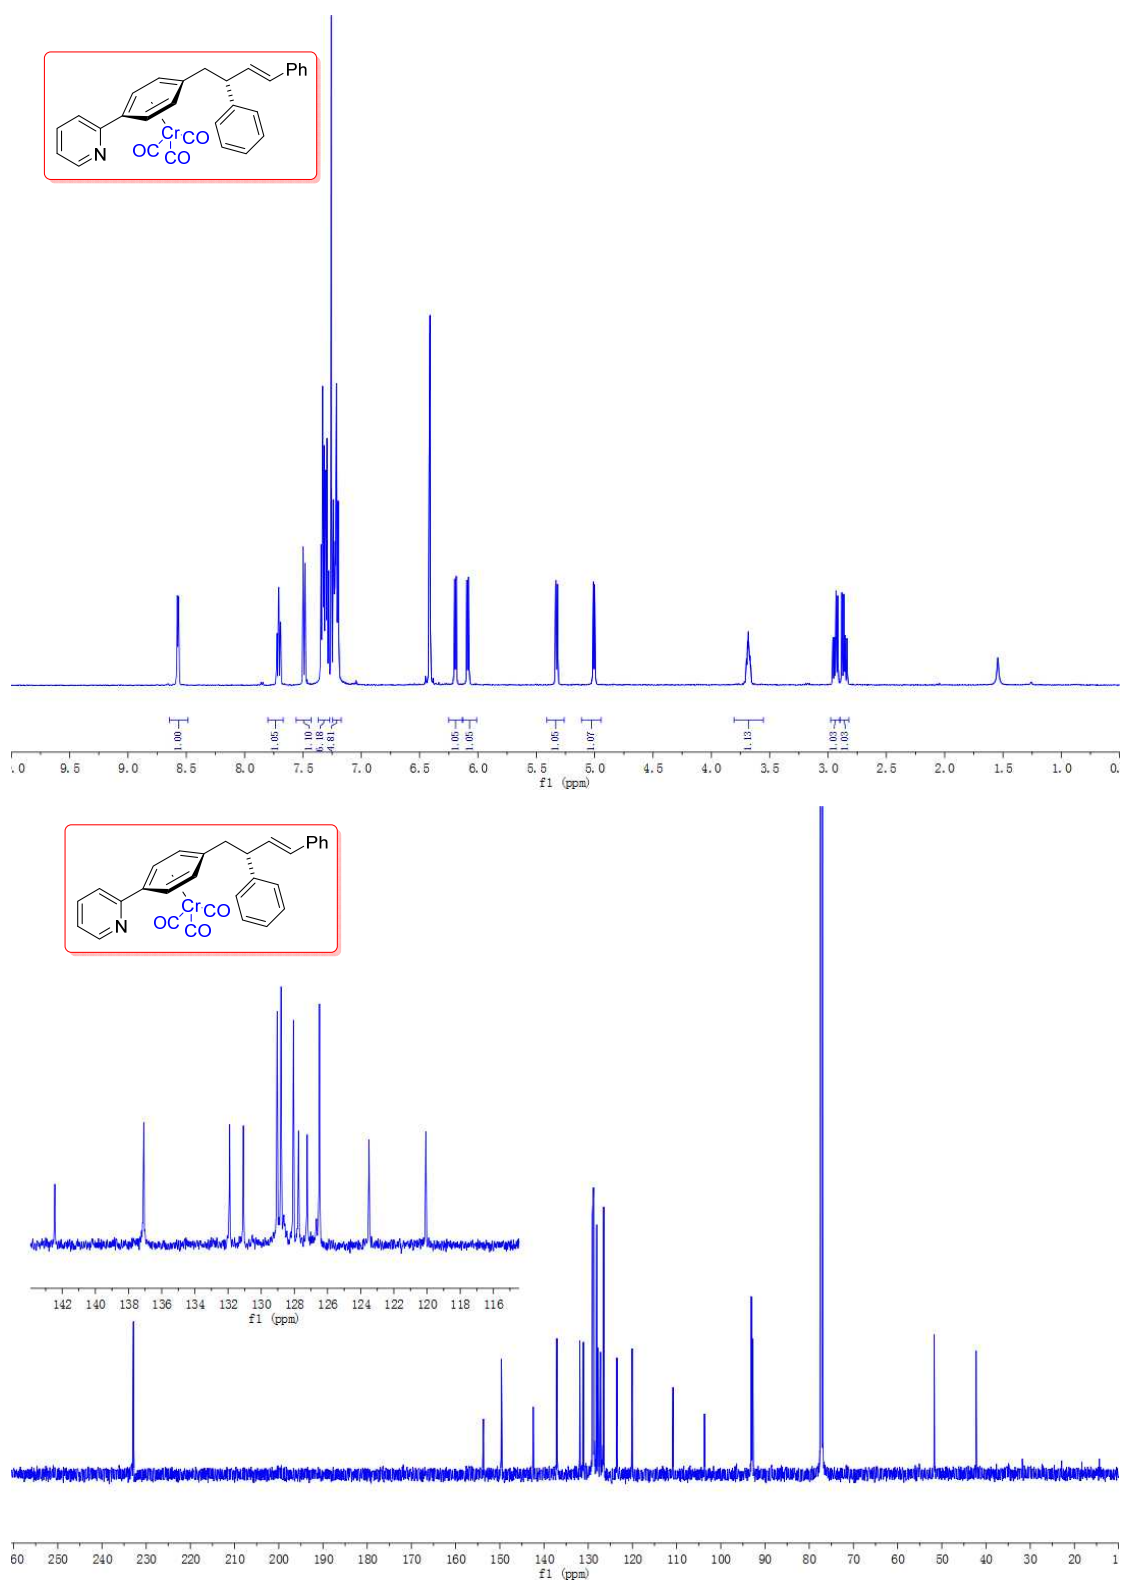

**Figure S18.** <sup>1</sup>H (500 MHz) and <sup>13</sup>C {<sup>1</sup>H} (125 MHz) NMR spectra of 3r in CDCl<sub>3</sub>

**(E)-(η<sup>6</sup>-(2,4-diphenylbut-3-en-1-yl)-(2-thiophenyl)-benzene)Cr(CO)<sub>3</sub> (3s)**

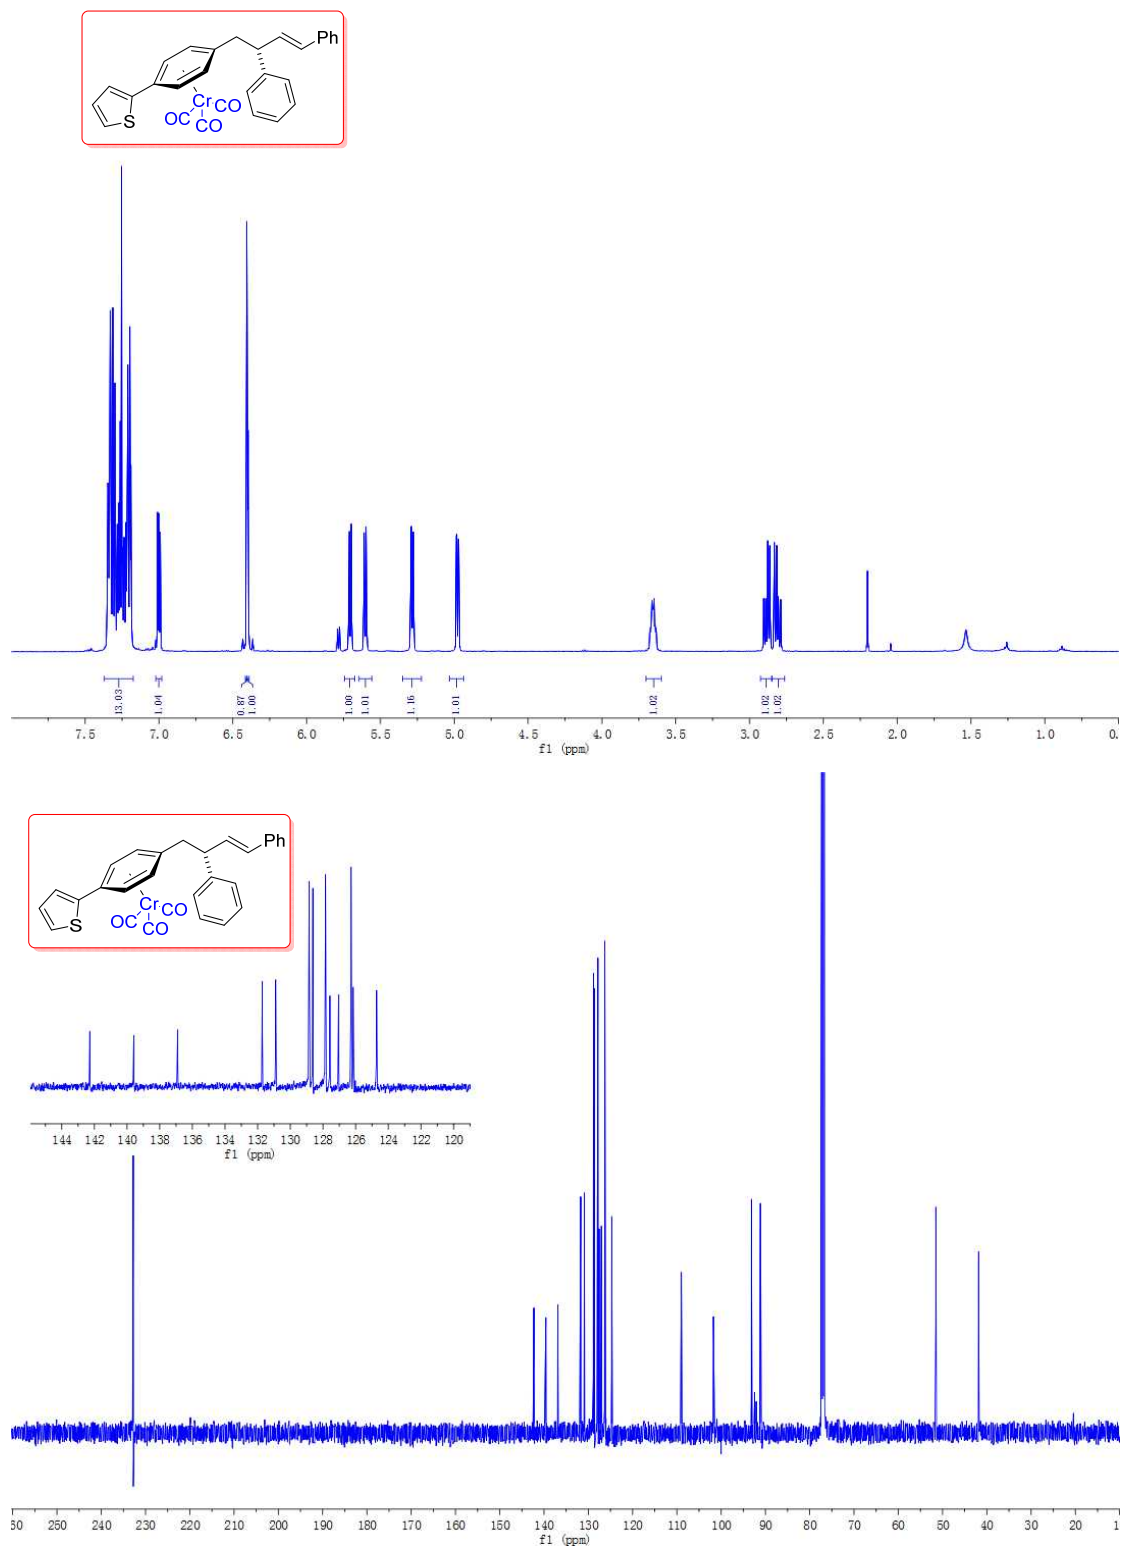

**Figure S19.** <sup>1</sup>H (500 MHz) and <sup>13</sup>C {<sup>1</sup>H} (125 MHz) NMR spectra of 3s in CDCl<sub>3</sub>

**(E)-(η<sup>6</sup>-(2,4-diphenylbut-3-en-1-yl)-(p-trifluoromethylphenyl)-benzene)Cr(CO)<sub>3</sub> (3t)**

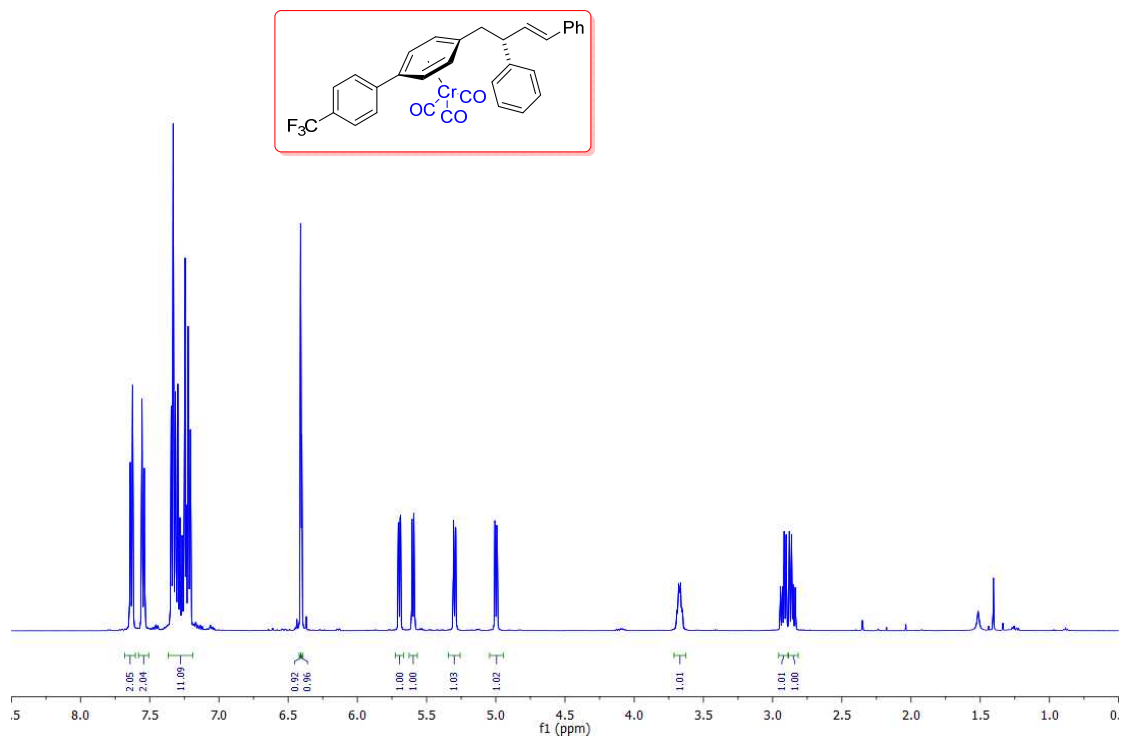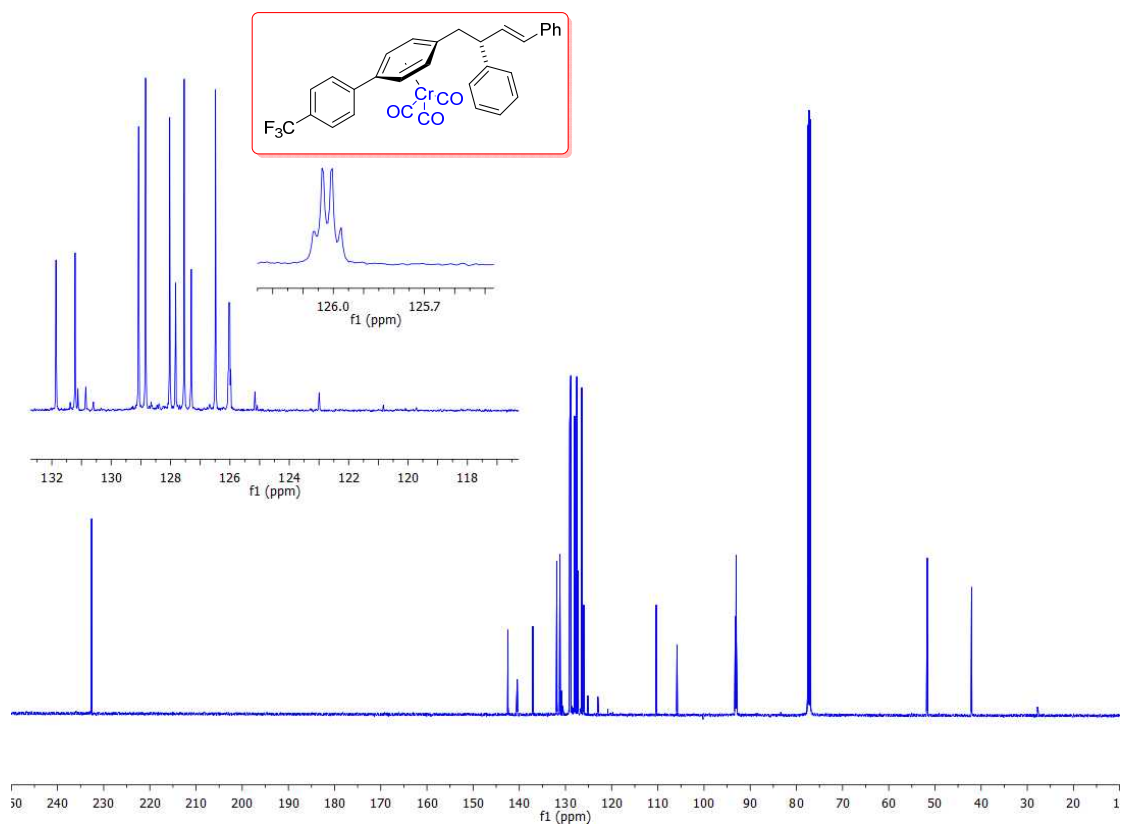

**Figure S20 <sup>1</sup>H (500 MHz) and <sup>13</sup>C {<sup>1</sup>H} (125 MHz) NMR spectra of 3t in CDCl<sub>3</sub>**



**(E)-( $\eta^6$ -(2,4-diphenylbut-3-en-1-yl)-(p-chlorophenyl)-benzene)Cr(CO)<sub>3</sub> (3u)**

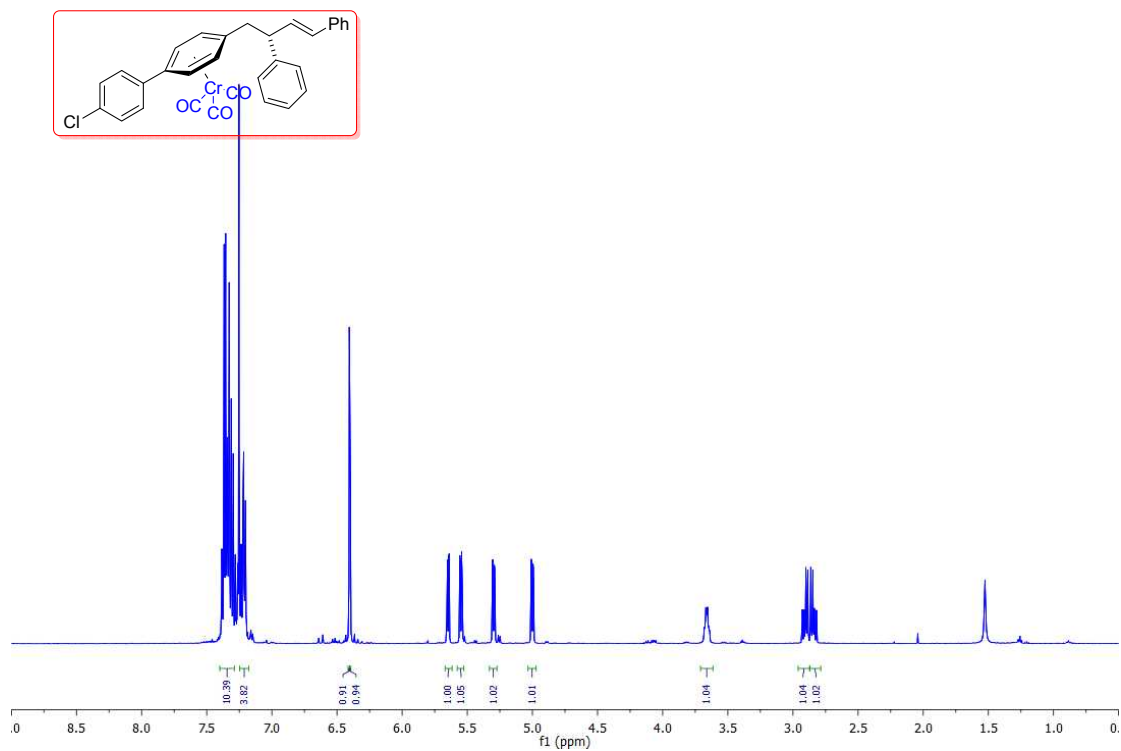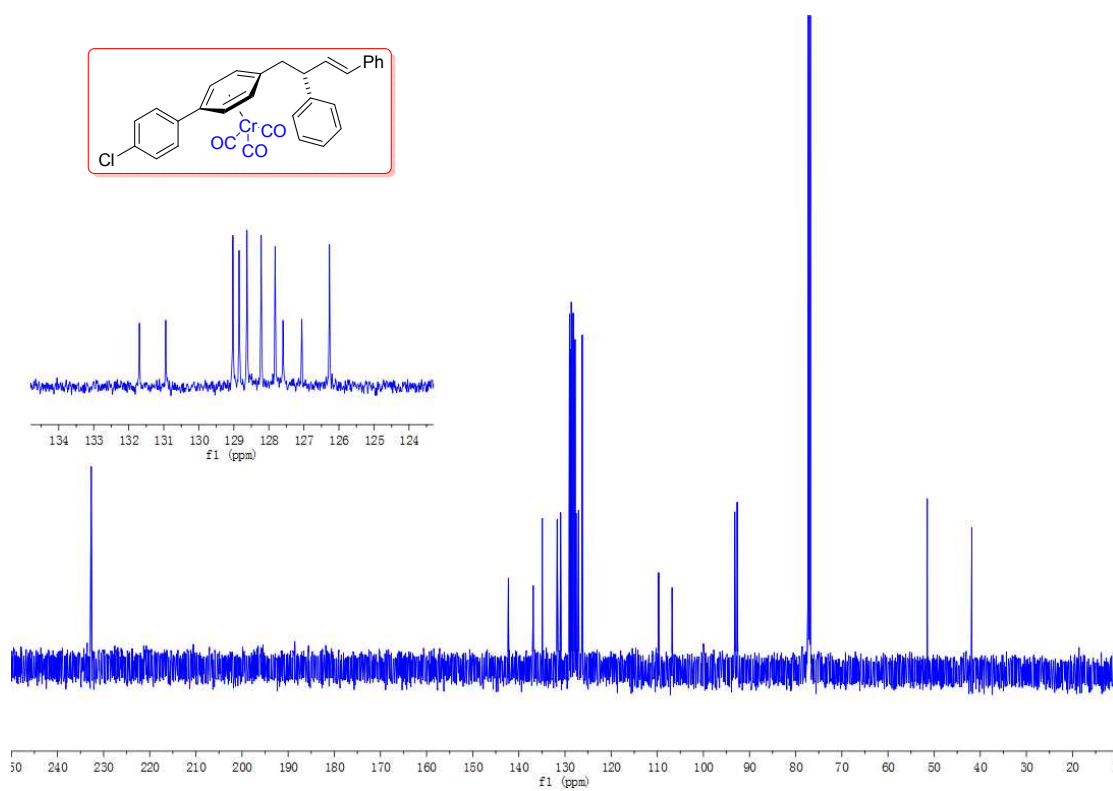

**Figure S21.** <sup>1</sup>H (500 MHz) and <sup>13</sup>C {<sup>1</sup>H} (125 MHz) NMR spectra of 3u in CDCl<sub>3</sub>

**(E)-(η<sup>6</sup>-(2,4-diphenylbut-3-en-1-yl)-(p-fluorophenyl)-benzene)Cr(CO)<sub>3</sub> (3v)**

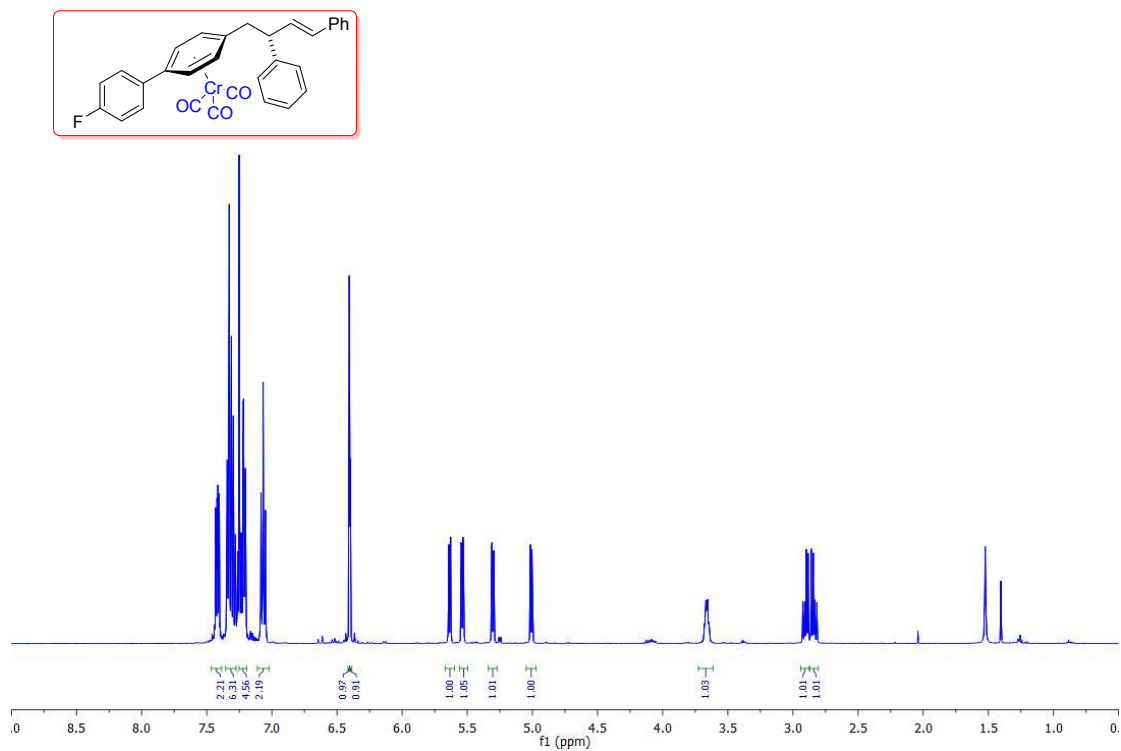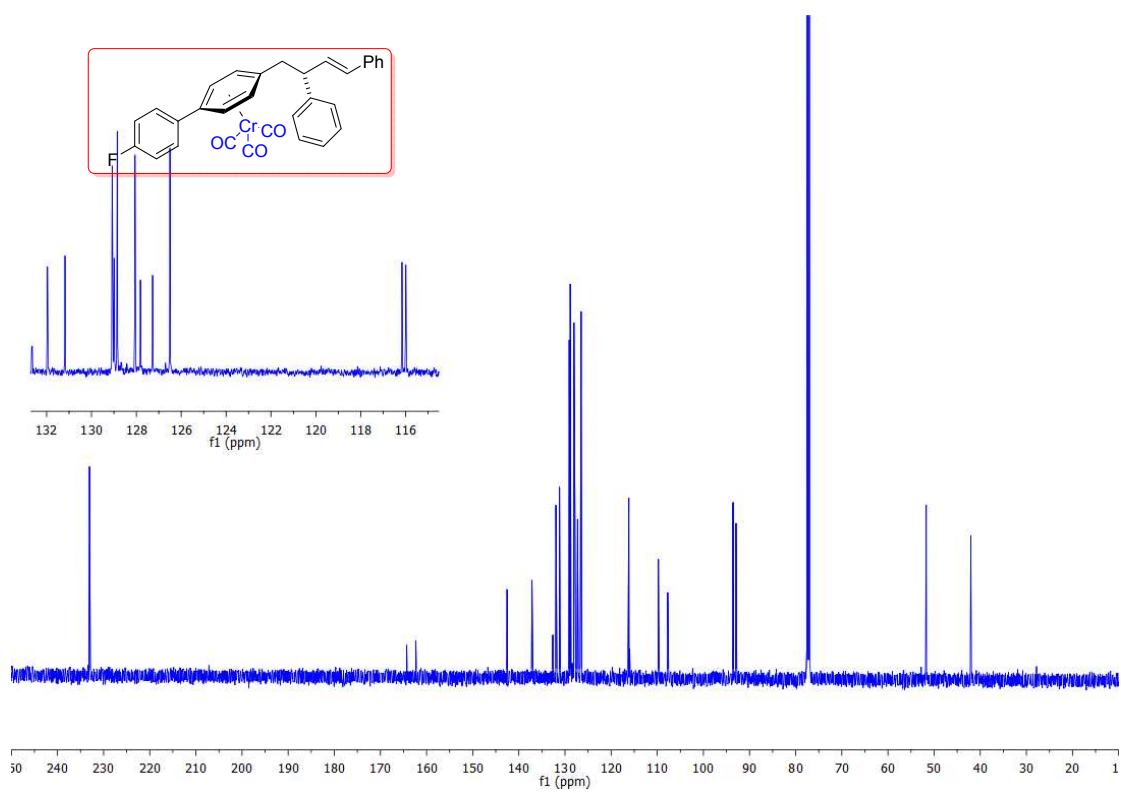

**Figure S22.** <sup>1</sup>H (500 MHz) and <sup>13</sup>C {<sup>1</sup>H} (125 MHz) NMR spectra of 3v in CDCl<sub>3</sub>

**(E)-( $\eta^6$ -(2-ethylhex-3-en-1-yl)-4-(2-pyridyl)-benzene)Cr(CO)<sub>3</sub> (3w)**

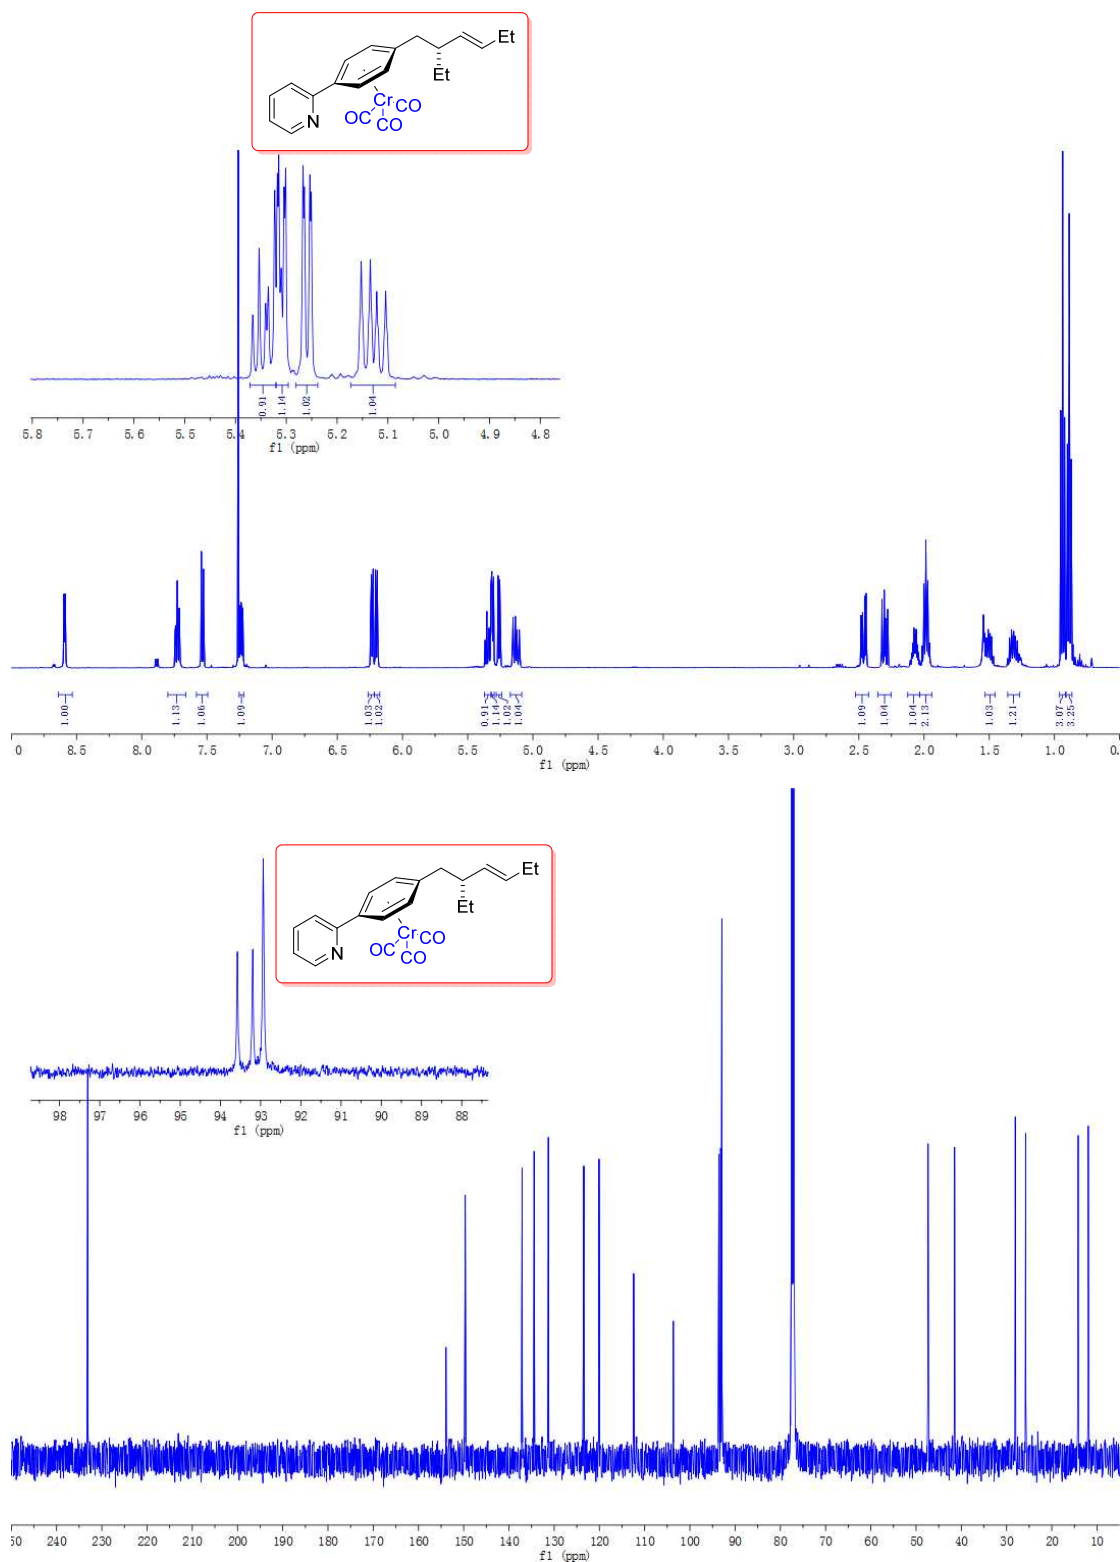

**Figure S23.** <sup>1</sup>H (500 MHz) and <sup>13</sup>C {<sup>1</sup>H} (125 MHz) NMR spectra of 3w in CDCl<sub>3</sub>

*cis*-( $\eta^6$ -(5-phenyl-2-cyclohexen-1-ylmethyl)-benzene)Cr(CO)<sub>3</sub> (3x)

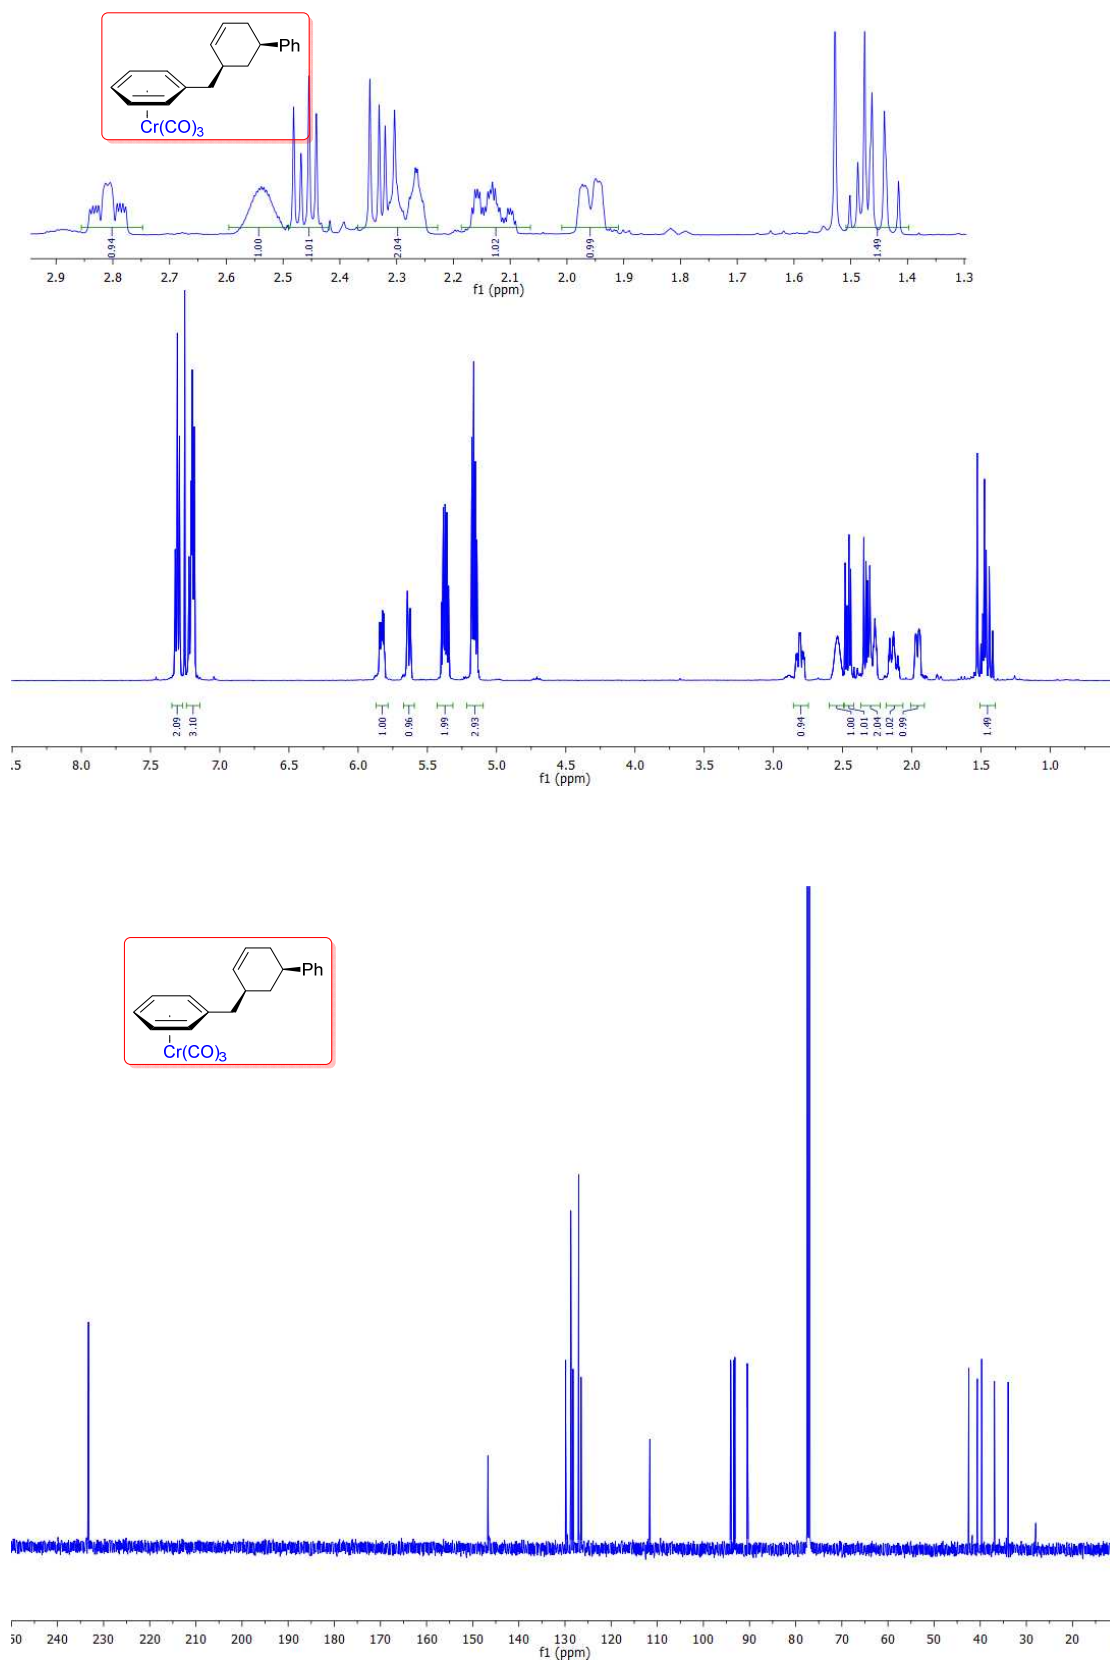

Figure S24. <sup>1</sup>H (500 MHz) and <sup>13</sup>C {<sup>1</sup>H} (125 MHz) NMR spectra of 3x in CDCl<sub>3</sub>

**(E)-2-(4-(2,4-diphenylbut-3-en-1-yl)phenyl)pyridine (3y)**

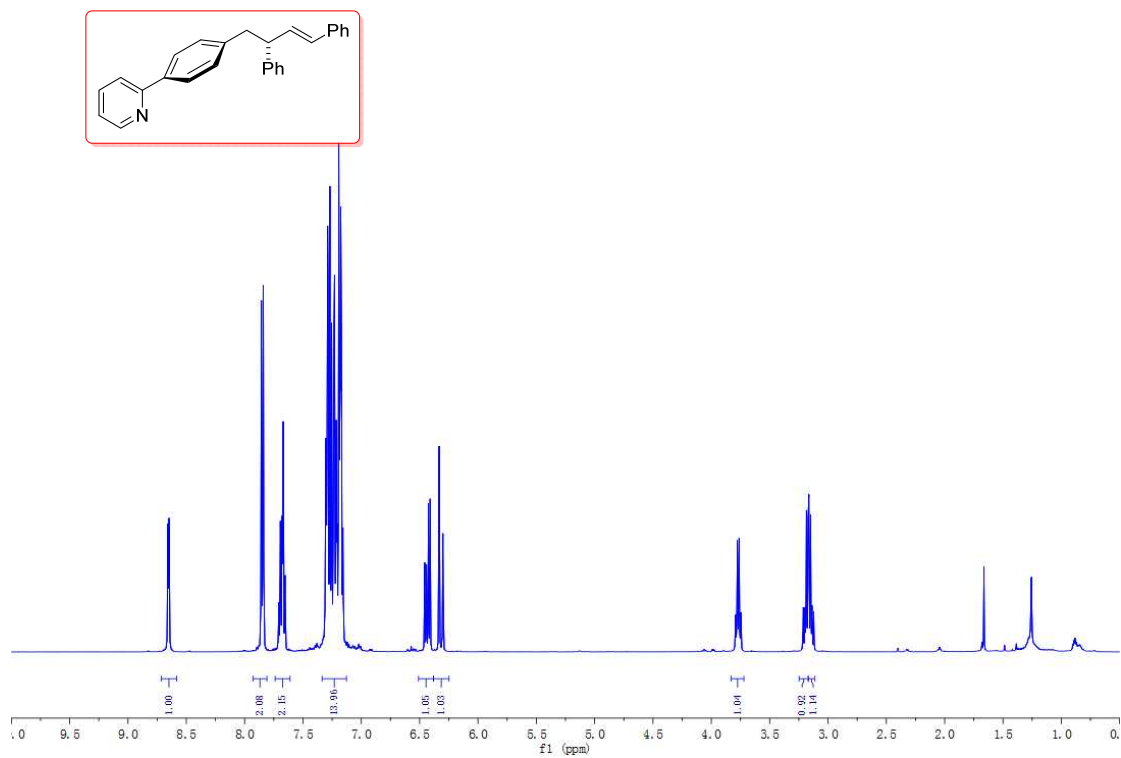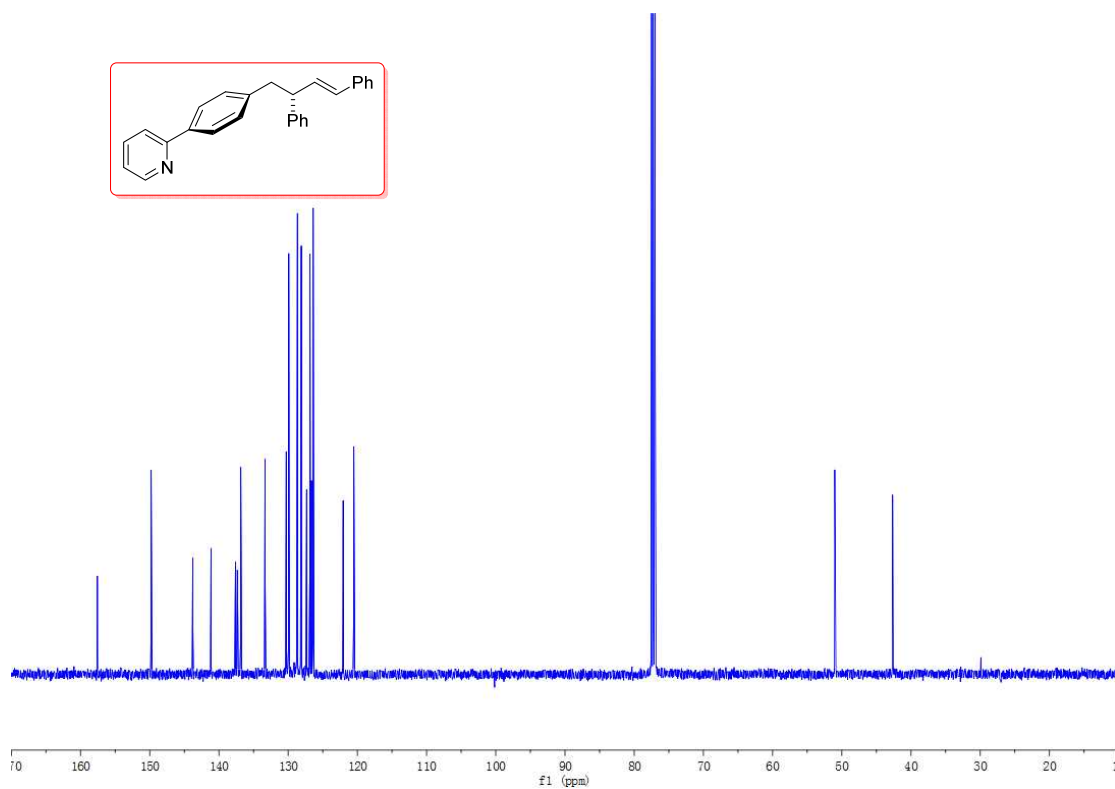

**Figure S25.**  $^1\text{H}$  (500 MHz) and  $^{13}\text{C}$   $\{^1\text{H}\}$  (125 MHz) NMR spectra of 3y in  $\text{CDCl}_3$



## 9. HPLC and SFC Chromatography of the Products

**Figure S27.** HPLC Chromatography of (-)-( $\eta^6$ -(2-cyclohexen-1-ylmethyl)-benzene)Cr(CO)<sub>3</sub> (**3a**) (Daicel Chiralcel OD-H column, 1% isopropanol in hexanes, 1 mL/min, 254 nm)

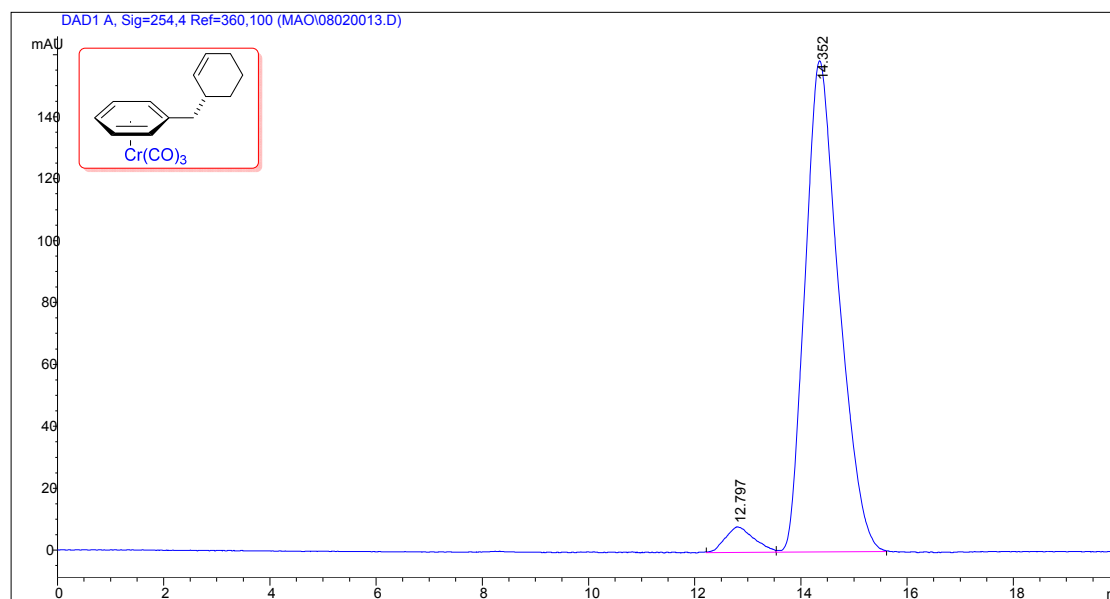

| Peak #   | RetTime [min] | Type | Width [min] | Area [mAU*s] | Height [mAU] | Area %  |
|----------|---------------|------|-------------|--------------|--------------|---------|
| 1        | 12.797        | BV   | 0.4516      | 308.34775    | 8.21995      | 4.2157  |
| 2        | 14.352        | VB   | 0.6213      | 7005.96045   | 158.63341    | 95.7843 |
| Totals : |               |      |             | 7314.30820   | 166.85336    |         |

**Figure S28.** HPLC Chromatography of Racemic-( $\eta^6$ -(2-cyclohexen-1-ylmethyl)-benzene)Cr(CO)<sub>3</sub> (**3a**) (Daicel Chiralcel OD-H column, 1% isopropanol in hexanes, 1 mL/min, 254 nm)

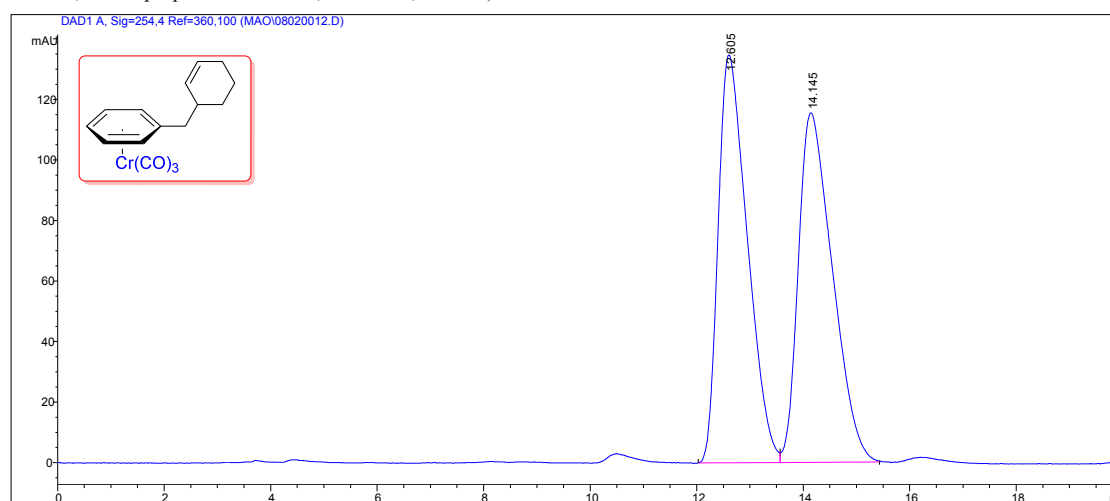

| Peak #   | RetTime [min] | Type | Width [min] | Area [mAU*s] | Height [mAU] | Area %  |
|----------|---------------|------|-------------|--------------|--------------|---------|
| 1        | 12.605        | BV   | 0.5606      | 5137.38672   | 134.79625    | 50.0301 |
| 2        | 14.145        | VB   | 0.6383      | 5131.19971   | 115.49967    | 49.9699 |
| Totals : |               |      |             | 1.02686e4    | 250.29592    |         |

**Figure S29.** HPLC Chromatography of (-)-(η<sup>6</sup>-(2-cyclohexen-1-ylmethyl)-4-(p-tolyl)-benzene)Cr(CO)<sub>3</sub> (**3b**) (Daicel Chiralpak AD-H column, 5% isopropanol in hexanes, 0.8 mL/min, 254 nm)

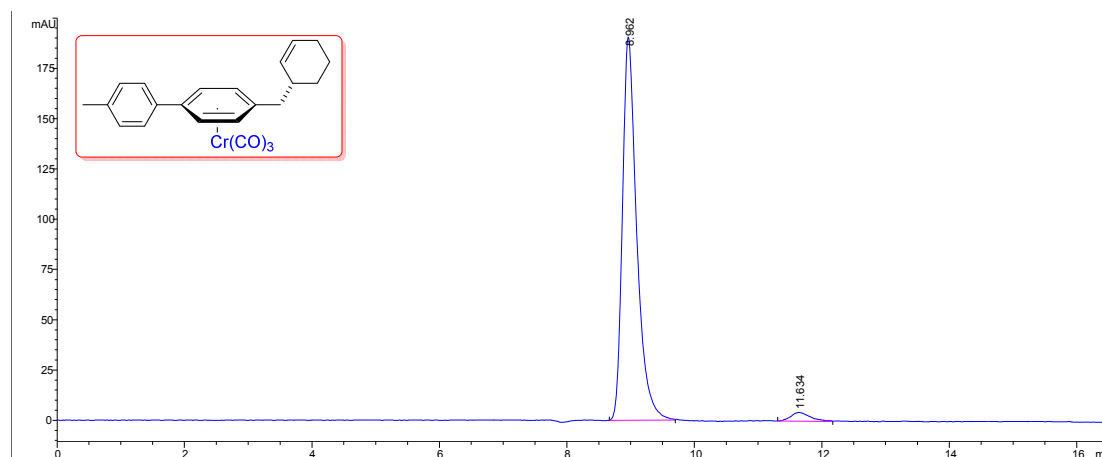

| Peak #   | RetTime [min] | Type | Width [min] | Area [mAU*s] | Height [mAU] | Area %  |
|----------|---------------|------|-------------|--------------|--------------|---------|
| 1        | 8.962         | BB   | 0.2346      | 2981.94141   | 190.54967    | 97.0998 |
| 2        | 11.634        | BB   | 0.2622      | 89.06477     | 4.29066      | 2.9002  |
| Totals : |               |      |             | 3071.00617   | 194.84033    |         |

**Figure S30.** HPLC Chromatography of Racemic-(η<sup>6</sup>-(2-cyclohexen-1-ylmethyl)-4-(p-tolyl)-benzene)Cr(CO)<sub>3</sub> (**3b**) (Daicel Chiralpak AD-H column, 5% isopropanol in hexanes, 0.8 mL/min, 254 nm)

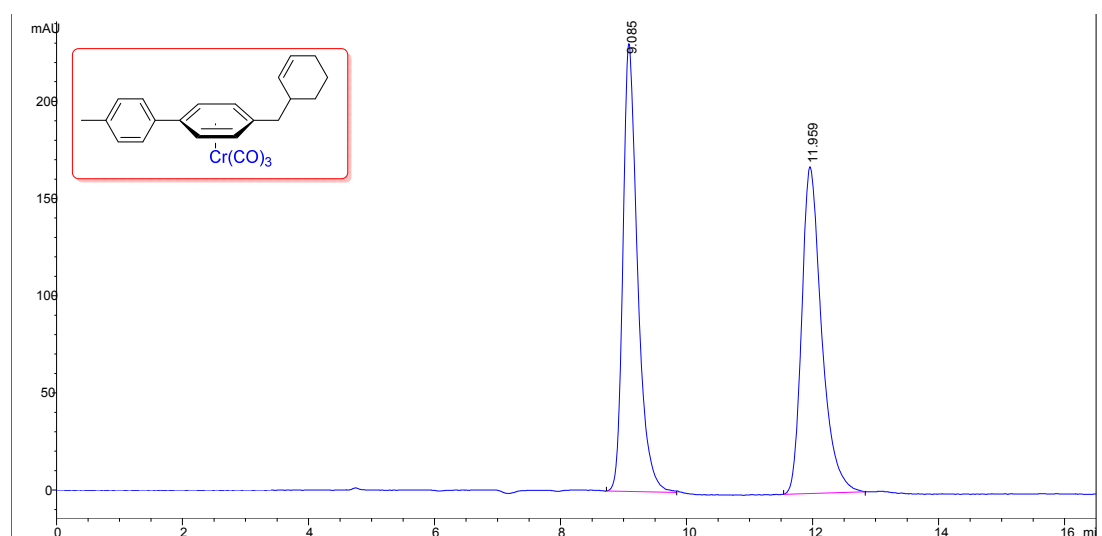

| Peak #   | RetTime [min] | Type | Width [min] | Area [mAU*s] | Height [mAU] | Area %  |
|----------|---------------|------|-------------|--------------|--------------|---------|
| 1        | 9.085         | PB   | 0.2424      | 3722.02588   | 230.45227    | 50.2085 |
| 2        | 11.959        | BB   | 0.3323      | 3691.10767   | 168.04063    | 49.7915 |
| Totals : |               |      |             | 7413.13354   | 398.49290    |         |



**Figure S31.** HPLC Chromatography of (-)-( $\eta^6$ -(2-cycloheptene-1-ylmethyl)-4-(*p*-tolyl)-benzene)Cr(CO)<sub>3</sub> (**3c**) (Daicel Chiralpak AD-H column, 5% isopropanol in hexanes, 1 mL/min, 254 nm)

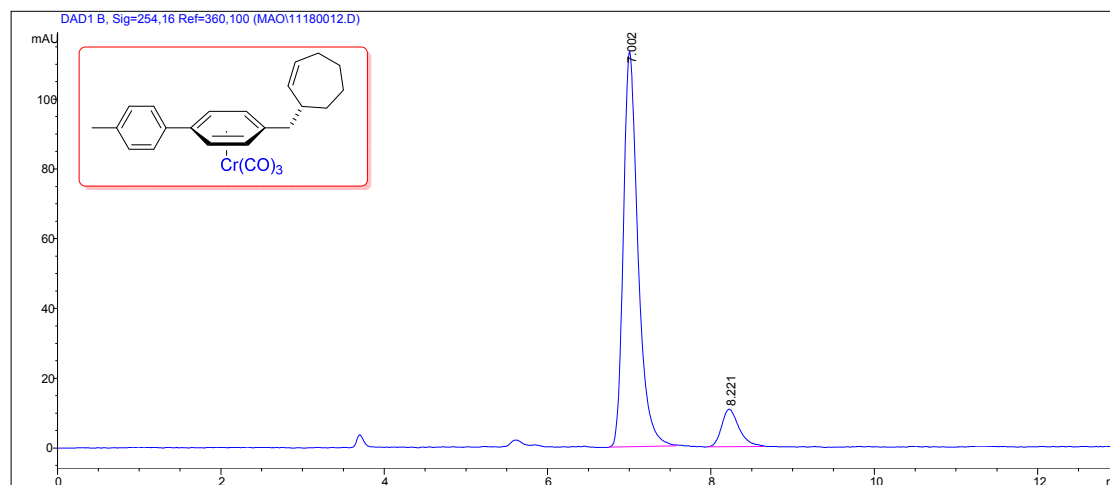

| Peak #   | RetTime [min] | Type | Width [min] | Area [mAU*s] | Height [mAU] | Area %  |
|----------|---------------|------|-------------|--------------|--------------|---------|
| 1        | 7.002         | MM   | 0.2093      | 1426.26880   | 113.57224    | 90.7723 |
| 2        | 8.221         | MM   | 0.2328      | 144.99117    | 10.37832     | 9.2277  |
| Totals : |               |      |             | 1571.25996   | 123.95055    |         |

**Figure S32.** HPLC Chromatography of Racemic-( $\eta^6$ -(2-cycloheptene-1-ylmethyl)-4-(*p*-tolyl)-benzene)Cr(CO)<sub>3</sub> (**3c**) (Daicel Chiralpak AD-H column, 5% isopropanol in hexanes, 1 mL/min, 254 nm)

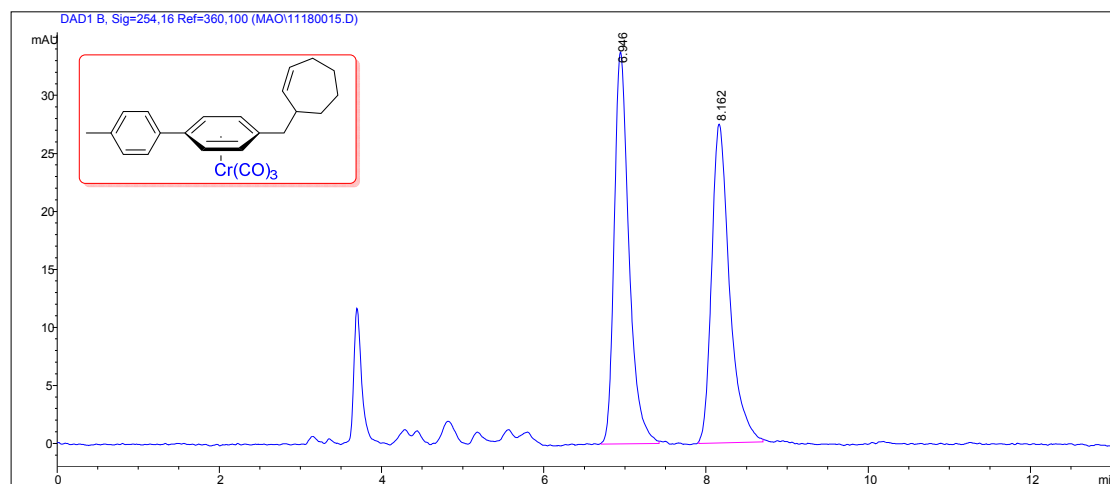

| Peak #   | RetTime [min] | Type | Width [min] | Area [mAU*s] | Height [mAU] | Area %  |
|----------|---------------|------|-------------|--------------|--------------|---------|
| 1        | 6.946         | BB   | 0.1917      | 428.11591    | 33.81565     | 50.3155 |
| 2        | 8.162         | BB   | 0.2315      | 422.74731    | 27.48004     | 49.6845 |
| Totals : |               |      |             | 850.86322    | 61.29569     |         |

**Figure S33.** HPLC Chromatography of (-)-( $\eta^6$ -(2-cyclohexen-1-ylmethyl)-4-(2-pyridyl)-benzene)Cr(CO)<sub>3</sub> (**3d**) (Daicel Chiralpak AD-H column, 5% isopropanol in hexanes, 1 mL/min, 254 nm)

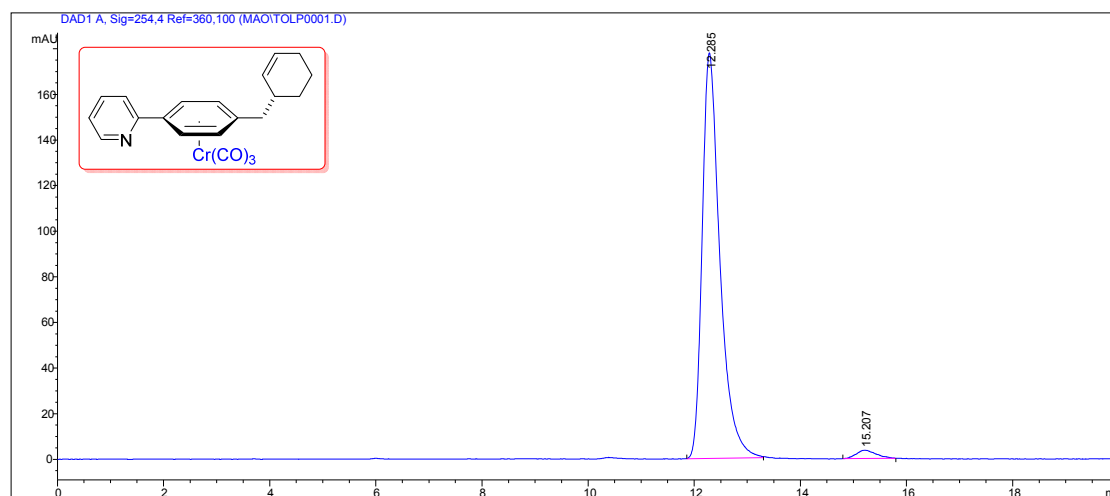

| Peak #   | RetTime [min] | Type | Width [min] | Area [mAU*s] | Height [mAU] | Area %  |
|----------|---------------|------|-------------|--------------|--------------|---------|
| 1        | 12.285        | BB   | 0.3494      | 4134.89014   | 177.75035    | 97.7503 |
| 2        | 15.207        | BB   | 0.3128      | 95.16547     | 3.61910      | 2.2497  |
| Totals : |               |      |             | 4230.05561   | 181.36945    |         |

**Figure S34.** HPLC Chromatography of Racemic-( $\eta^6$ -(2-cyclohexen-1-ylmethyl)-4-(2-pyridyl)-benzene)Cr(CO)<sub>3</sub> (**3d**) (Daicel Chiralpak AD-H column, 5% isopropanol in hexanes, 1 mL/min, 254 nm)

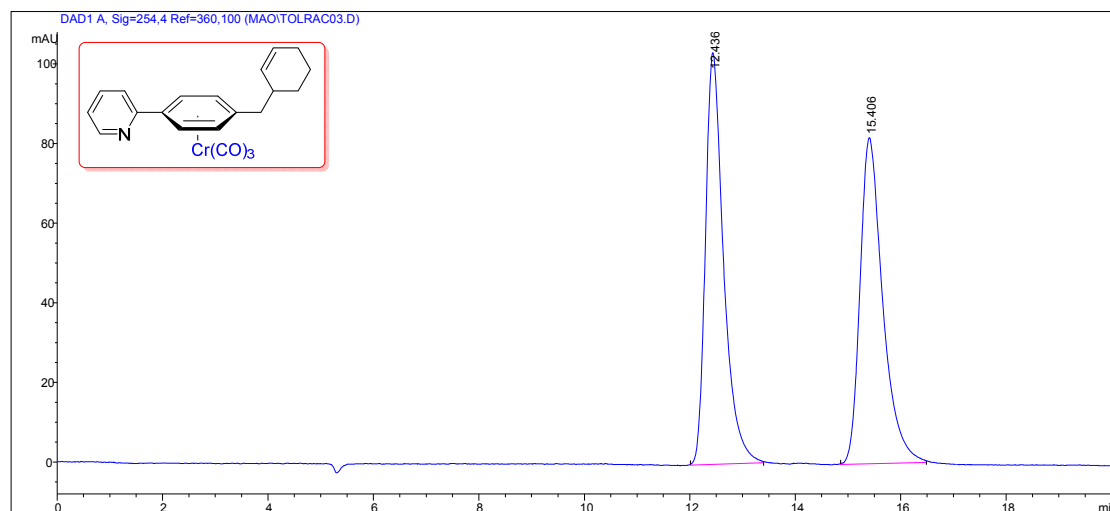

| Peak #   | RetTime [min] | Type | Width [min] | Area [mAU*s] | Height [mAU] | Area %  |
|----------|---------------|------|-------------|--------------|--------------|---------|
| 1        | 12.436        | BB   | 0.3628      | 2470.47583   | 103.36775    | 50.2543 |
| 2        | 15.406        | BB   | 0.4446      | 2445.47583   | 81.83861     | 49.7457 |
| Totals : |               |      |             | 4915.95166   | 185.20636    |         |

**Figure S35.** HPLC Chromatography of (-)-(1<sup>6</sup>-(2-cycloheptene-1-ylmethyl)-4-(2-pyridyl)-benzene)Cr(CO)<sub>3</sub> (**3e**) (Daicel Chiralpak AD-H column, 10% isopropanol in hexanes, 1 mL/min, 230 nm)

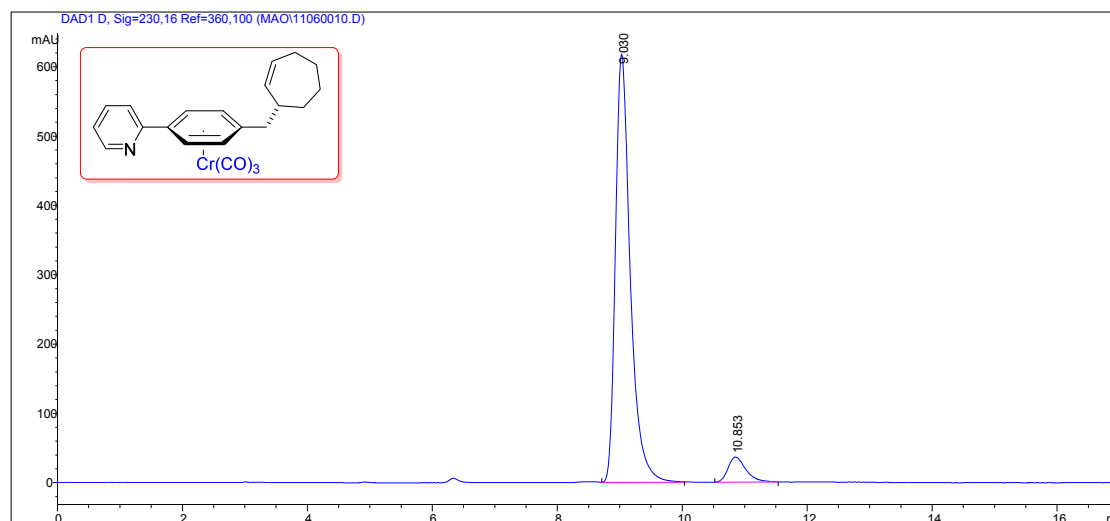

| Peak #   | RetTime [min] | Type | Width [min] | Area [mAU*s] | Height [mAU] | Area %  |
|----------|---------------|------|-------------|--------------|--------------|---------|
| 1        | 9.030         | VB   | 0.2503      | 1.01821e4    | 617.63788    | 93.3338 |
| 2        | 10.853        | BB   | 0.3025      | 727.23602    | 36.18559     | 6.6662  |
| Totals : |               |      |             | 1.09094e4    | 653.82347    |         |

**Figure S36.** HPLC Chromatography of Racemic (1<sup>6</sup>-(2-cycloheptene-1-ylmethyl)-4-(2-pyridyl)-benzene)Cr(CO)<sub>3</sub> (**3e**) (Daicel Chiralpak AD-H column, 10% isopropanol in hexanes, 1 mL/min, 230 nm)

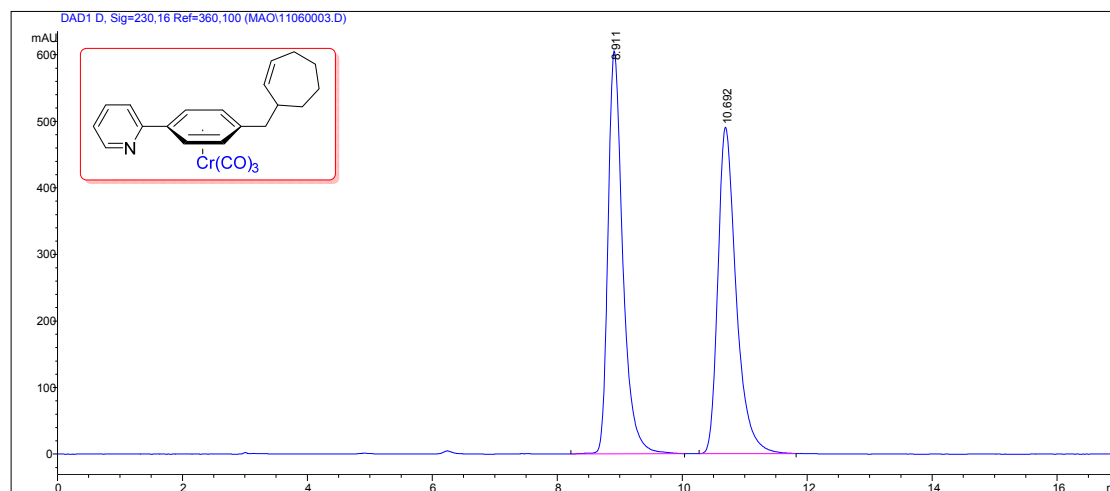

| Peak #   | RetTime [min] | Type | Width [min] | Area [mAU*s] | Height [mAU] | Area %  |
|----------|---------------|------|-------------|--------------|--------------|---------|
| 1        | 8.911         | PB   | 0.2503      | 9975.95996   | 605.27020    | 50.0167 |
| 2        | 10.692        | BB   | 0.3071      | 9969.29004   | 490.60995    | 49.9833 |
| Totals : |               |      |             | 1.99453e4    | 1095.88016   |         |

**Figure S37.** HPLC Chromatography of (-)-(η<sup>6</sup>-(2-cyclohexen-1-ylmethyl)-4-(2-thiophenyl)-benzene)Cr(CO)<sub>3</sub> (**3f**) (Daicel Chiralpak AD-H column, 5% isopropanol in hexanes, 1 mL/min, 254 nm)

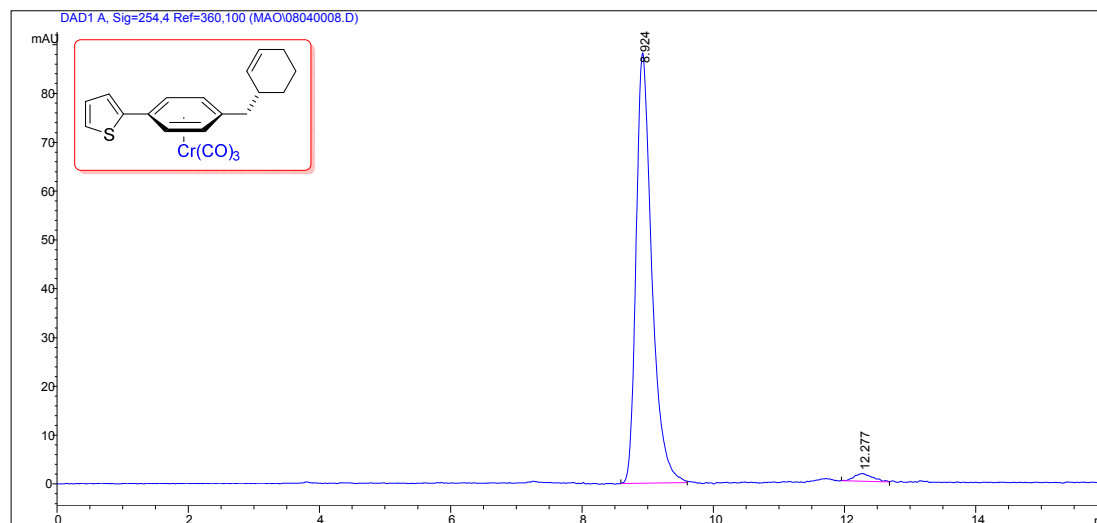

| Peak #   | RetTime [min] | Type | Width [min] | Area [mAU*s] | Height [mAU] | Area %  |
|----------|---------------|------|-------------|--------------|--------------|---------|
| 1        | 8.924         | BB   | 0.2501      | 1465.99377   | 88.10648     | 97.8950 |
| 2        | 12.277        | PV   | 0.2486      | 31.52340     | 1.59488      | 2.1050  |
| Totals : |               |      |             | 1497.51717   | 89.70136     |         |

**Figure S38.** HPLC Chromatography of Racemic (η<sup>6</sup>-(2-cyclohexen-1-ylmethyl)-4-(2-thiophenyl)-benzene)Cr(CO)<sub>3</sub> (**3f**) (Daicel Chiralpak AD-H column, 5% isopropanol in hexanes, 1 mL/min, 254 nm)

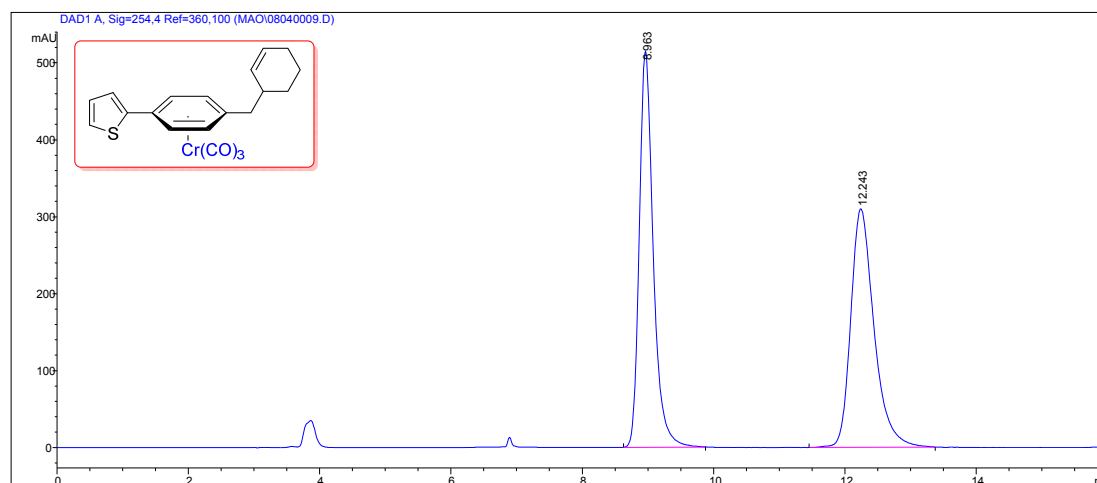

| Peak #   | RetTime [min] | Type | Width [min] | Area [mAU*s] | Height [mAU] | Area %  |
|----------|---------------|------|-------------|--------------|--------------|---------|
| 1        | 8.963         | BB   | 0.2268      | 7618.07715   | 514.41003    | 49.9194 |
| 2        | 12.243        | BB   | 0.3716      | 7642.67090   | 309.97571    | 50.0806 |
| Totals : |               |      |             | 1.52607e4    | 824.38574    |         |

**Figure S39.** HPLC Chromatography of (-)-( $\eta^6$ -(2-cycloheptene-1-ylmethyl)-4-(2-thiophenyl)-benzene)Cr(CO)<sub>3</sub> (**3g**) (Daicel Chiralpak AD-H column, 10% isopropanol in hexanes, 1 mL/min, 254 nm)

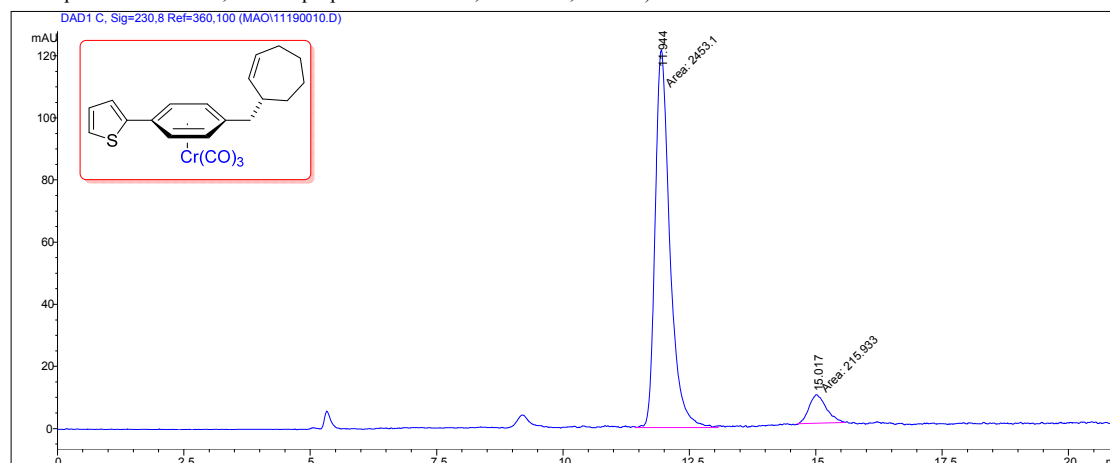

| Peak # | RetTime [min] | Type | Width [min] | Area [mAU*s] | Height [mAU] | Area %  |
|--------|---------------|------|-------------|--------------|--------------|---------|
| 1      | 11.944        | MM   | 0.3363      | 2451.35645   | 121.48005    | 91.4745 |
| 2      | 15.017        | MM   | 0.4030      | 228.46703    | 9.44778      | 8.5255  |

Totals : 1571.25996 123.95055

**Figure S40.** HPLC Chromatography of Racemic ( $\eta^6$ -(2-cycloheptene-1-ylmethyl)-4-(2-thiophenyl)-benzene)Cr(CO)<sub>3</sub> (**3g**) (Daicel Chiralpak AD-H column, 10% isopropanol in hexanes, 1 mL/min, 254 nm)

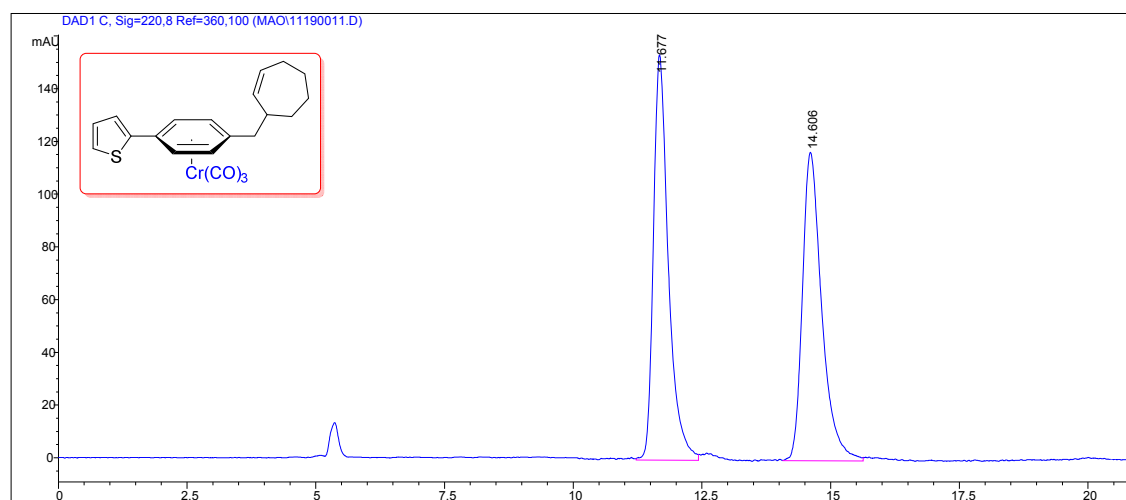

| Peak # | RetTime [min] | Type | Width [min] | Area [mAU*s] | Height [mAU] | Area %  |
|--------|---------------|------|-------------|--------------|--------------|---------|
| 1      | 11.677        | BB   | 0.3039      | 3110.29224   | 153.79663    | 50.3645 |
| 2      | 14.606        | VB   | 0.3855      | 3065.26880   | 117.04102    | 49.6355 |

Totals : 6175.56104 270.83765

**Figure S41.** HPLC Chromatography of (-)-(η<sup>6</sup>-(2-cyclohexen-1-ylmethyl)-4-(N-pyrrolyl)-benzene)Cr(CO)<sub>3</sub> (**3h**) (Daicel Chiralpak AD-H column, 5% isopropanol in hexanes, 1 mL/min, 254 nm)

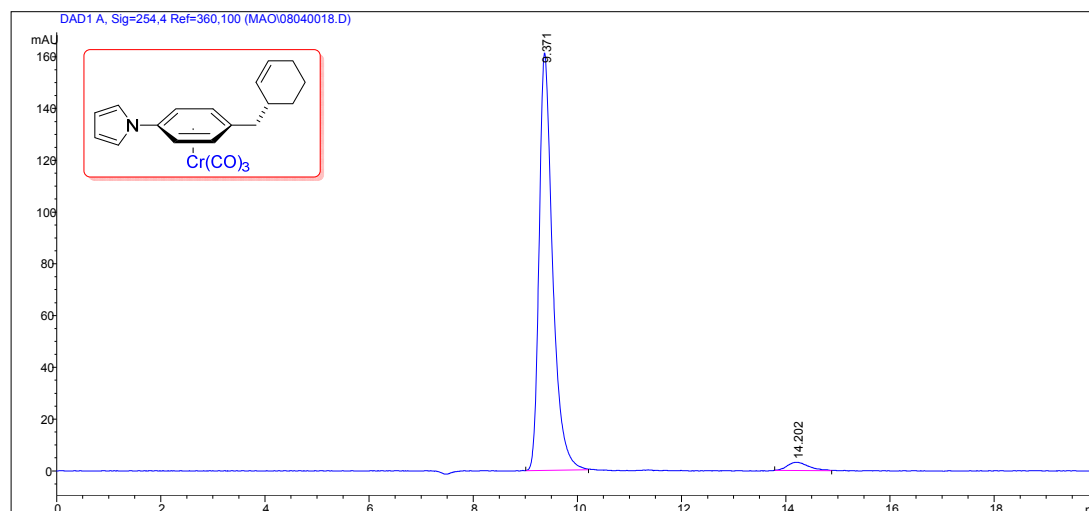

| Peak #   | RetTime [min] | Type | Width [min] | Area [mAU*s] | Height [mAU] | Area %  |
|----------|---------------|------|-------------|--------------|--------------|---------|
| 1        | 9.371         | BB   | 0.2718      | 2900.85962   | 161.28438    | 96.9723 |
| 2        | 14.202        | BB   | 0.3399      | 90.57287     | 3.18405      | 3.0277  |
| Totals : |               |      |             | 2991.43249   | 164.46843    |         |

**Figure S42.** HPLC Chromatography of Racemic (η<sup>6</sup>-(2-cyclohexen-1-ylmethyl)-4-(N-pyrrolyl)-benzene)Cr(CO)<sub>3</sub> (**3h**) (Daicel Chiralpak AD-H column, 5% isopropanol in hexanes, 1 mL/min, 254 nm)

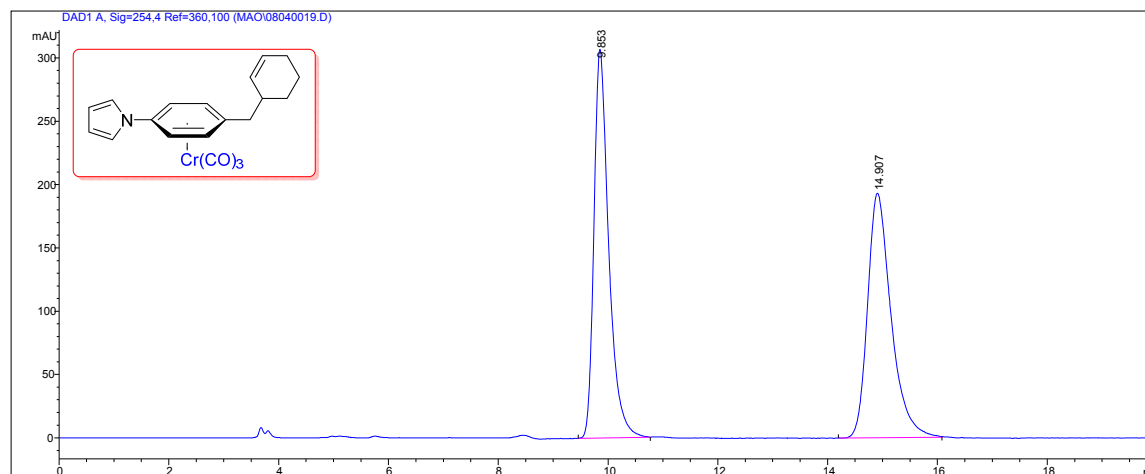

| Peak #   | RetTime [min] | Type | Width [min] | Area [mAU*s] | Height [mAU] | Area %  |
|----------|---------------|------|-------------|--------------|--------------|---------|
| 1        | 9.853         | PB   | 0.2782      | 5743.46289   | 307.05627    | 50.0461 |
| 2        | 14.907        | PB   | 0.4483      | 5732.87549   | 193.14444    | 49.9539 |
| Totals : |               |      |             | 1.14763e4    | 500.20071    |         |

**Figure S43.** HPLC Chromatography of (-)-( $\eta^6$ -(2-cycloheptene-1-ylmethyl)-4-(*N*-pyrrolyl)-benzene)Cr(CO)<sub>3</sub> (**3i**) (Daicel Chiralpak AD-H column, 10% isopropanol in hexanes, 1 mL/min, 254 nm)

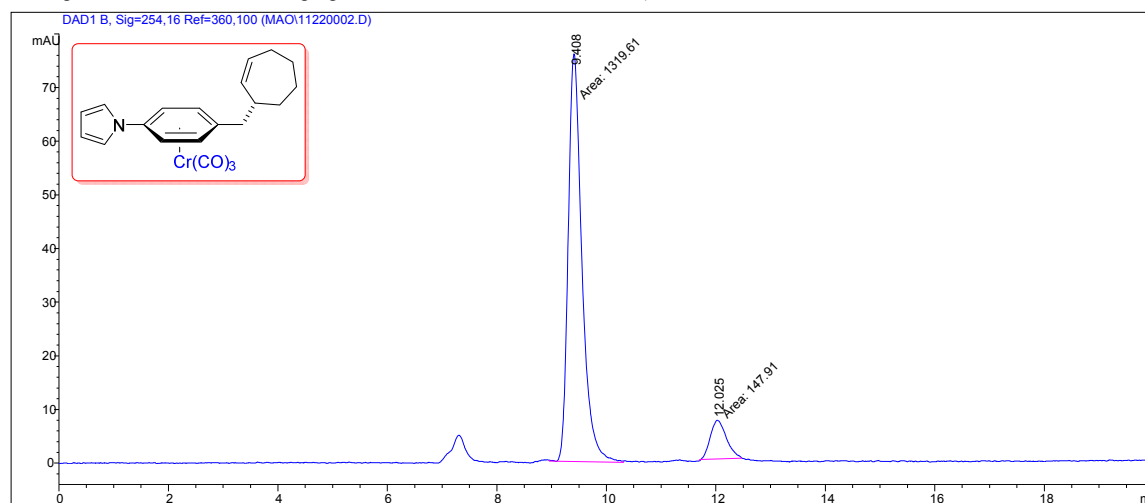

| Peak #   | RetTime [min] | Type | Width [min] | Area [mAU*s] | Height [mAU] | Area %  |
|----------|---------------|------|-------------|--------------|--------------|---------|
| 1        | 9.408         | MM   | 0.2895      | 1319.61414   | 75.96938     | 89.9211 |
| 2        | 12.025        | MM   | 0.3417      | 147.90999    | 7.21384      | 10.0789 |
| Totals : |               |      |             | 1467.52412   | 83.18322     |         |

**Figure S44.** HPLC Chromatography of Racemic ( $\eta^6$ -(2-cycloheptene-1-ylmethyl)-4-(*N*-pyrrolyl)-benzene)Cr(CO)<sub>3</sub> (**3i**) (Daicel Chiralpak AD-H column, 10% isopropanol in hexanes, 1 mL/min, 254 nm)

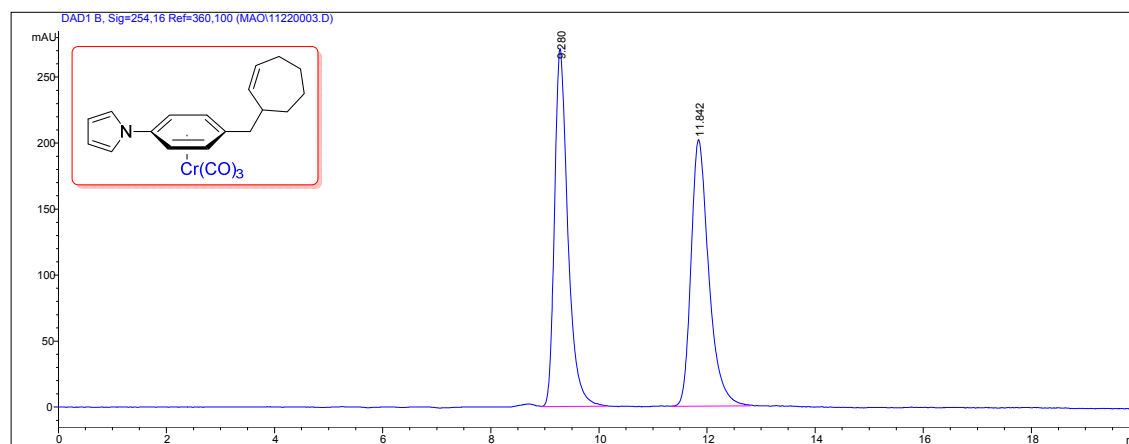

| Peak #   | RetTime [min] | Type | Width [min] | Area [mAU*s] | Height [mAU] | Area %  |
|----------|---------------|------|-------------|--------------|--------------|---------|
| 1        | 9.280         | VB   | 0.2581      | 4647.25879   | 270.92712    | 50.2281 |
| 2        | 11.842        | BB   | 0.3421      | 4605.05029   | 201.90938    | 49.7719 |
| Totals : |               |      |             | 9252.30908   | 472.83650    |         |

**Figure S45.** HPLC Chromatography of (-)-( $\eta^6$ -(2-cyclohexen-1-ylmethyl)-4-(*p*-chlorophenyl)-benzene)Cr(CO)<sub>3</sub> (**3j**) (Daicel Chiralpak AD-H column, 10% isopropanol in hexanes, 1 mL/min, 254 nm)

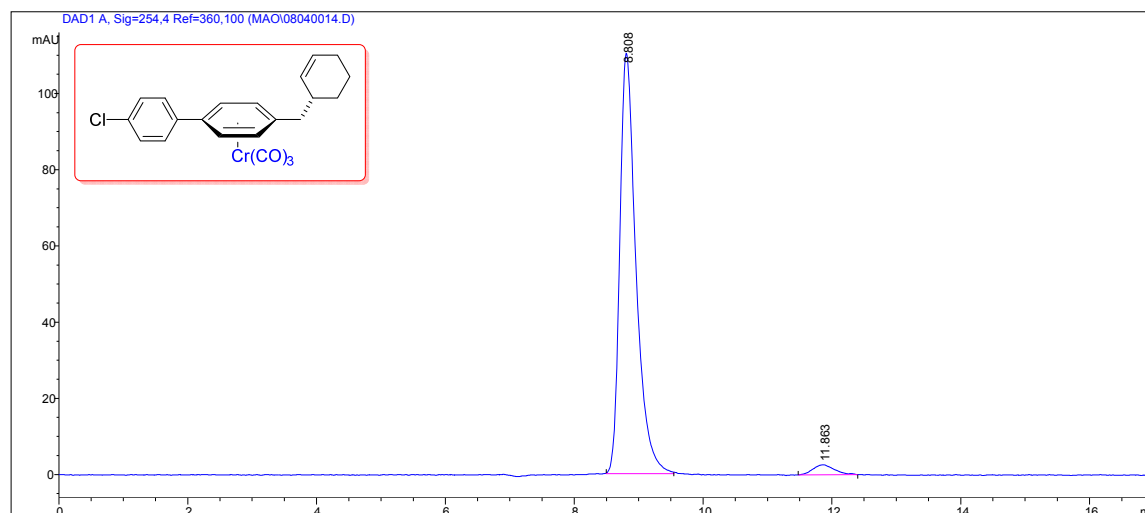

| Peak #   | RetTime [min] | Type | Width [min] | Area [mAU*s] | Height [mAU] | Area %  |
|----------|---------------|------|-------------|--------------|--------------|---------|
| 1        | 8.808         | BB   | 0.2661      | 1930.96094   | 110.35913    | 96.8269 |
| 2        | 11.863        | PB   | 0.2964      | 63.27964     | 2.69062      | 3.1731  |
| Totals : |               |      |             | 1994.24058   | 113.04975    |         |

**Figure S46.** HPLC Chromatography of Racemic ( $\eta^6$ -(2-cyclohexen-1-ylmethyl)-4-(*p*-chlorophenyl)-benzene)Cr(CO)<sub>3</sub> (**3j**) (Daicel Chiralpak AD-H column, 10% isopropanol in hexanes, 1 mL/min, 254 nm)

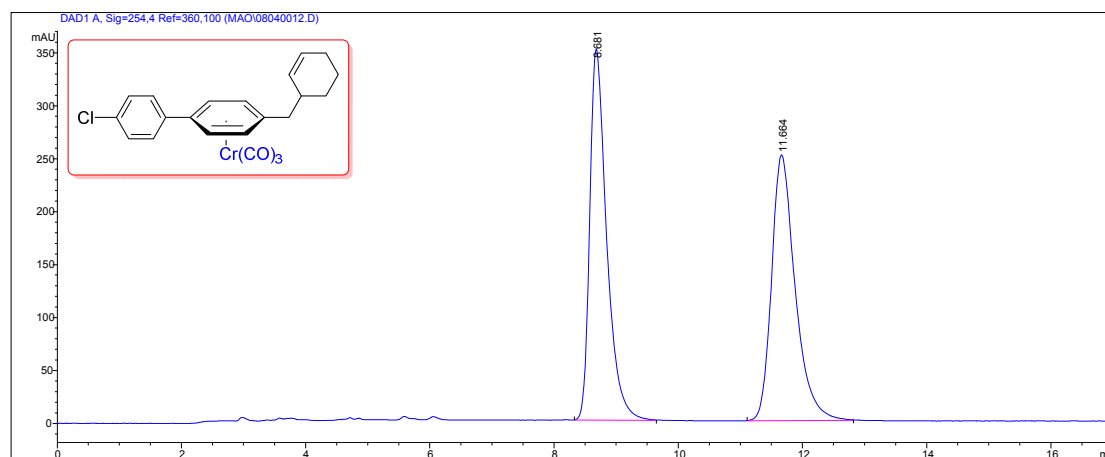

| Peak #   | RetTime [min] | Type | Width [min] | Area [mAU*s] | Height [mAU] | Area %  |
|----------|---------------|------|-------------|--------------|--------------|---------|
| 1        | 8.681         | BB   | 0.2844      | 6610.35059   | 349.97873    | 49.9269 |
| 2        | 11.664        | BB   | 0.3984      | 6629.70947   | 250.78882    | 50.0731 |
| Totals : |               |      |             | 1.32401e4    | 600.76755    |         |



**Figure S47.** HPLC Chromatography of (-)-( $\eta^6$ -(2-cyclohexen-1-ylmethyl)-4-(*p*-trifluoromethylphenyl)-benzene)Cr(CO)<sub>3</sub> (**3k**) (Daicel Chiralpak AD-H column, 5% isopropanol in hexanes, 1 mL/min, 254 nm)

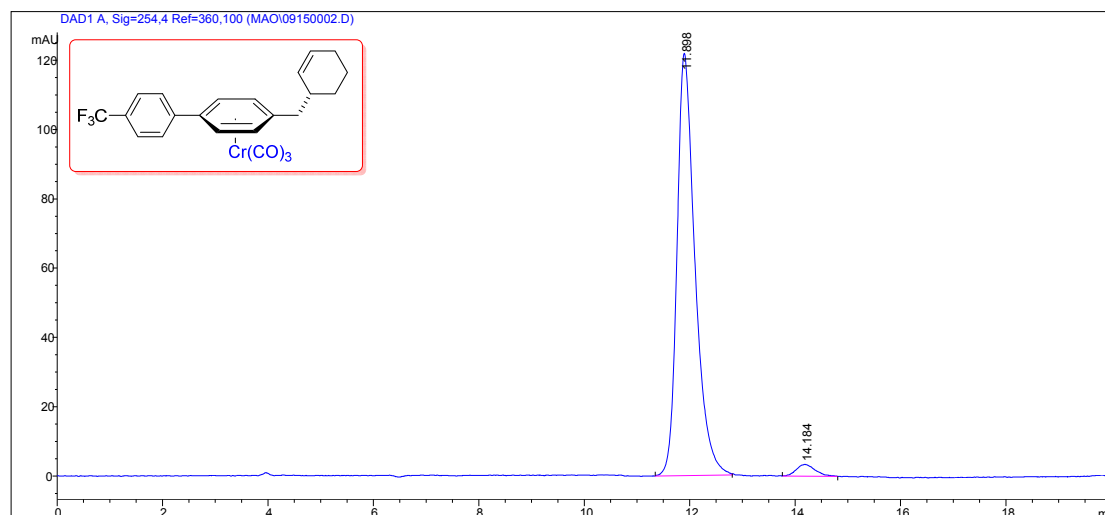

| Peak #   | RetTime [min] | Type | Width [min] | Area [mAU*s] | Height [mAU] | Area %  |
|----------|---------------|------|-------------|--------------|--------------|---------|
| 1        | 11.898        | BB   | 0.3549      | 2893.36670   | 121.88882    | 97.1506 |
| 2        | 14.184        | PB   | 0.3032      | 84.86157     | 3.39969      | 2.8494  |
| Totals : |               |      |             | 2978.22827   | 125.28851    |         |

**Figure S48.** HPLC Chromatography of Racemic ( $\eta^6$ -(2-cyclohexen-1-ylmethyl)-4-(*p*-trifluoromethylphenyl)-benzene)Cr(CO)<sub>3</sub> (**3k**) (Daicel Chiralpak AD-H column, 5% isopropanol in hexanes, 1 mL/min, 254 nm)

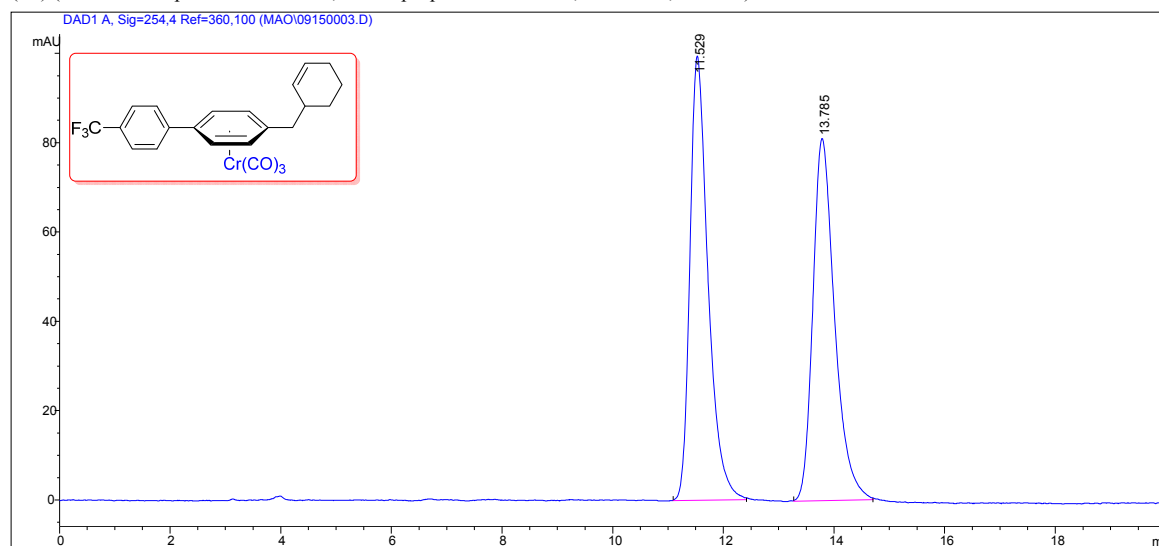

| Peak #   | RetTime [min] | Type | Width [min] | Area [mAU*s] | Height [mAU] | Area %  |
|----------|---------------|------|-------------|--------------|--------------|---------|
| 1        | 11.529        | BB   | 0.3380      | 2267.95459   | 99.46400     | 50.6349 |
| 2        | 13.785        | BB   | 0.4121      | 2211.07593   | 81.10450     | 49.3651 |
| Totals : |               |      |             | 4479.03052   | 180.56850    |         |

**Figure S49.** HPLC Chromatography of (-)-(η<sup>6</sup>-(2-cyclohexen-1-ylmethyl)-4-chloro-benzene)Cr(CO)<sub>3</sub> (**31**) (Daicel Chiralpak AD-H column, 5% isopropanol in hexanes, 0.8 mL/min, 254 nm)

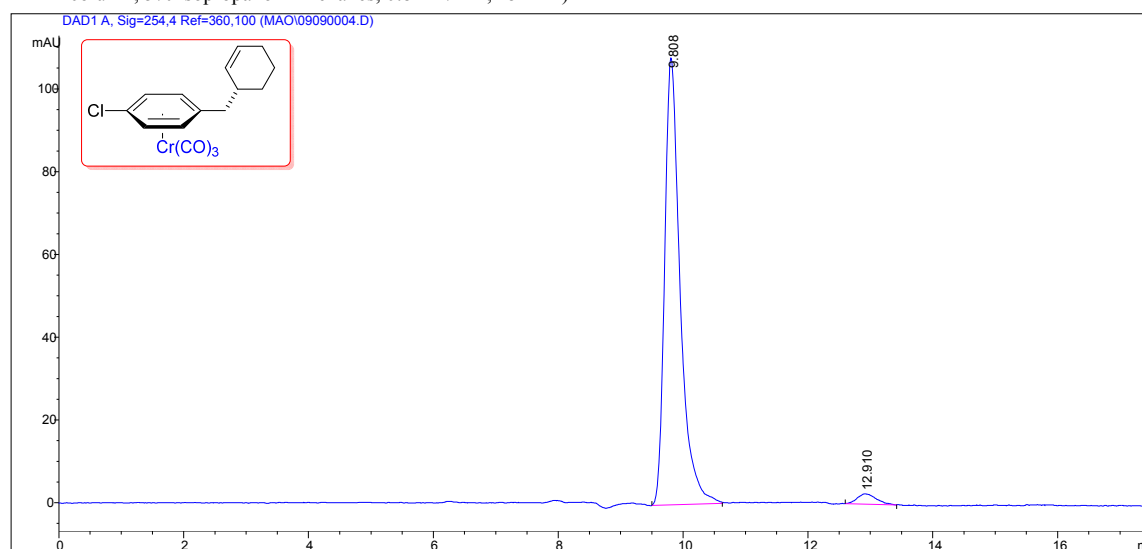

| Peak #   | RetTime [min] | Type | Width [min] | Area [mAU*s] | Height [mAU] | Area %  |
|----------|---------------|------|-------------|--------------|--------------|---------|
| 1        | 9.808         | PB   | 0.2569      | 1857.87256   | 107.89856    | 97.1465 |
| 2        | 12.910        | BB   | 0.2732      | 54.57198     | 2.53466      | 2.8535  |
| Totals : |               |      |             | 1912.44454   | 110.43322    |         |

**Figure S50.** HPLC Chromatography of Racemic (η<sup>6</sup>-(2-cyclohexen-1-ylmethyl)-4-chloro-benzene)Cr(CO)<sub>3</sub> (**31**) (Daicel Chiralpak AD-H column, 5% isopropanol in hexanes, 0.8 mL/min, 254 nm)

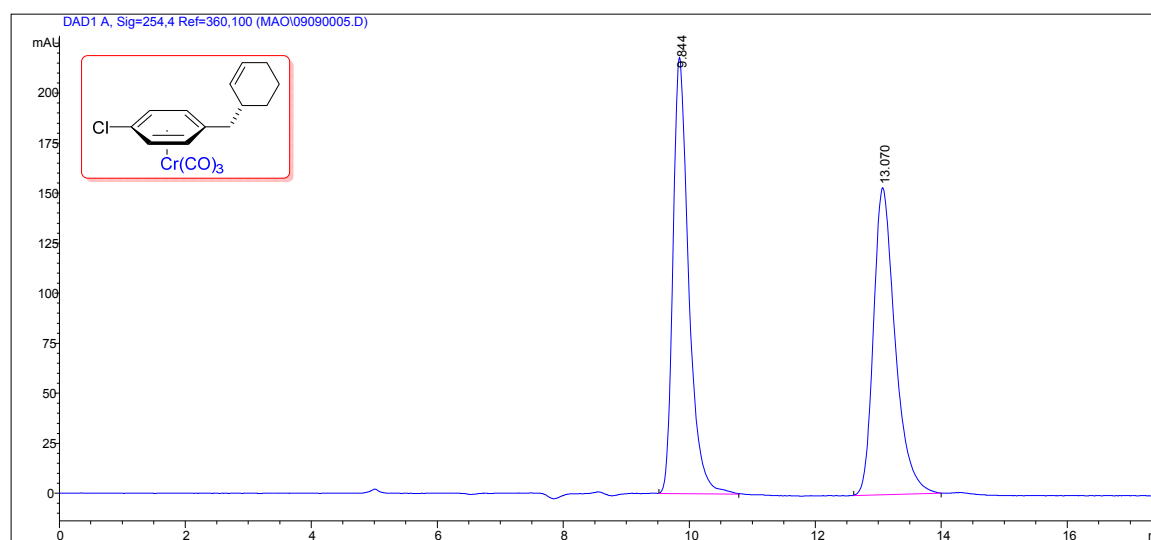

| Peak #   | RetTime [min] | Type | Width [min] | Area [mAU*s] | Height [mAU] | Area %  |
|----------|---------------|------|-------------|--------------|--------------|---------|
| 1        | 9.844         | BB   | 0.2609      | 3788.56763   | 217.88593    | 50.8900 |
| 2        | 13.070        | BB   | 0.3598      | 3656.06006   | 153.51476    | 49.1100 |
| Totals : |               |      |             | 7444.62769   | 371.40068    |         |

**Figure S51.** HPLC Chromatography of (-)-(2-cyclohexen-1-ylmethyl)-3-methoxybenzene (**3n**) (Daicel Chiralcel OJ-H column, 1% isopropanol in hexanes, 0.5 mL/min, 230 nm)

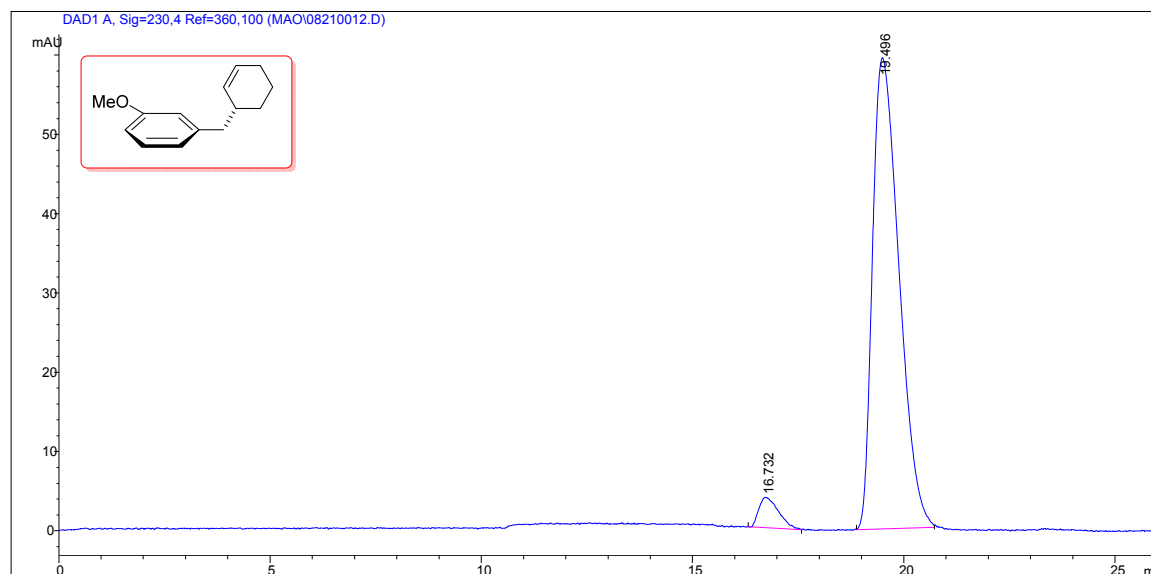

| Peak #   | RetTime [min] | Type | Width [min] | Area [mAU*s] | Height [mAU] | Area %  |
|----------|---------------|------|-------------|--------------|--------------|---------|
| 1        | 16.732        | BB   | 0.3920      | 123.76182    | 3.81944      | 4.5753  |
| 2        | 19.496        | BB   | 0.6349      | 2581.21509   | 59.40750     | 95.4247 |
| Totals : |               |      |             | 2704.97691   | 63.22694     |         |

**Figure S52.** HPLC Chromatography of Racemic (2-cyclohexen-1-ylmethyl)-3-methoxybenzene (**3n**) (Daicel Chiralcel OJ-H column, 1% isopropanol in hexanes, 0.5 mL/min, 230 nm)

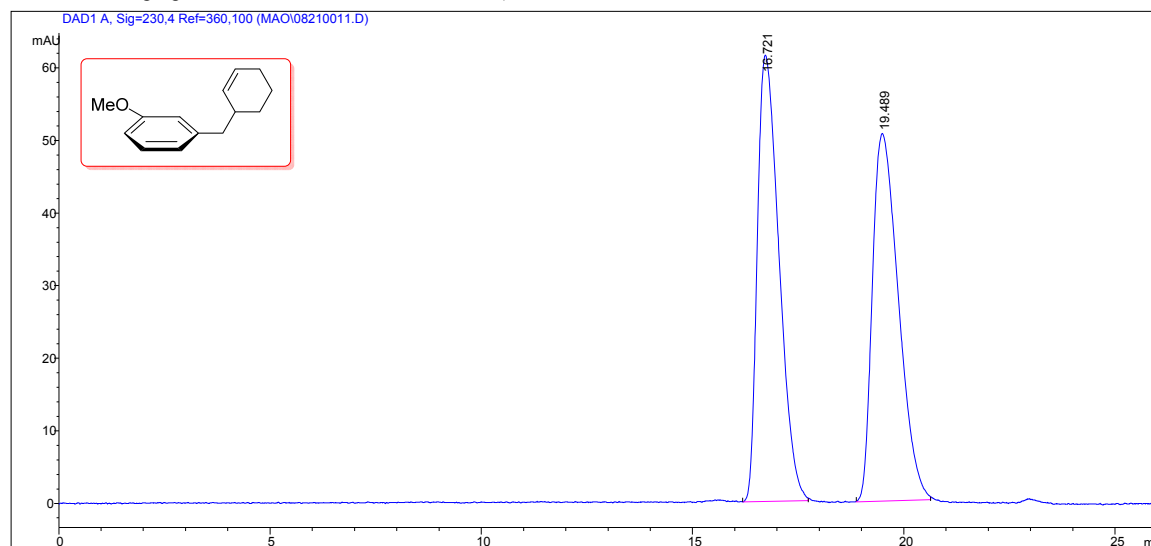

| Peak #   | RetTime [min] | Type | Width [min] | Area [mAU*s] | Height [mAU] | Area %  |
|----------|---------------|------|-------------|--------------|--------------|---------|
| 1        | 16.721        | PB   | 0.5275      | 2188.95581   | 61.46886     | 50.2959 |
| 2        | 19.489        | BB   | 0.6343      | 2163.19702   | 50.64337     | 49.7041 |
| Totals : |               |      |             | 4352.15283   | 112.11223    |         |

**Figure S53.** HPLC Chromatography of (-)-(2-cyclohexen-1-ylmethyl)-3-chlorobenzene (**3m**) (Daicel Chiralcel OJ-H column, 0.5% isopropanol in hexanes, 0.4 mL/min, 230 nm)

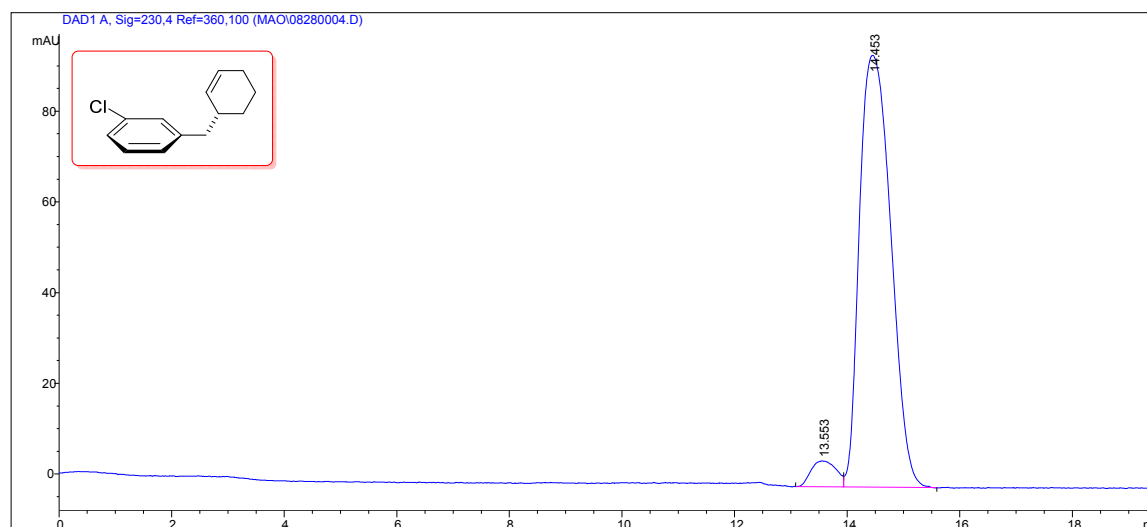

| Peak #   | RetTime [min] | Type | Width [min] | Area [mAU*s] | Height [mAU] | Area %  |
|----------|---------------|------|-------------|--------------|--------------|---------|
| 1        | 13.553        | PV   | 0.3762      | 179.12894    | 5.73759      | 4.6344  |
| 2        | 14.453        | VP   | 0.6217      | 3686.04956   | 95.19756     | 95.3656 |
| Totals : |               |      |             | 3865.17850   | 100.93515    |         |

**Figure S54.** HPLC Chromatography of Racemic (2-cyclohexen-1-ylmethyl)-3-chlorobenzene (**3m**) (Daicel Chiralcel OJ-H column, 0.5% isopropanol in hexanes, 0.4 mL/min, 230 nm)

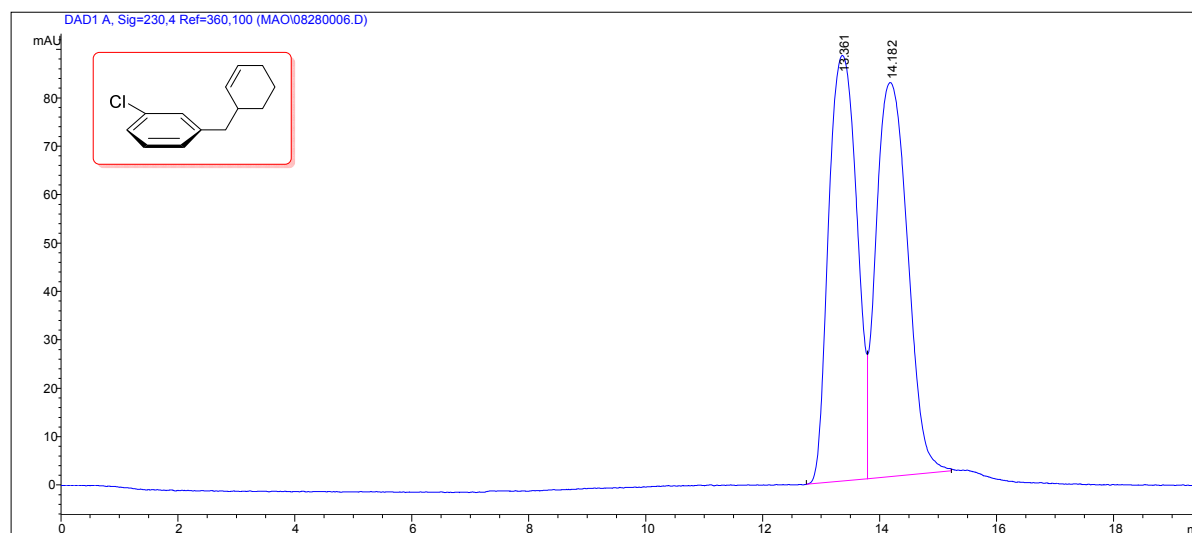

| Peak #   | RetTime [min] | Type | Width [min] | Area [mAU*s] | Height [mAU] | Area %  |
|----------|---------------|------|-------------|--------------|--------------|---------|
| 1        | 13.361        | PV   | 0.5401      | 2955.41602   | 87.94601     | 49.0507 |
| 2        | 14.182        | VB   | 0.5959      | 3069.81128   | 81.42049     | 50.9493 |
| Totals : |               |      |             | 6025.22729   | 169.36650    |         |

**Figure S55.** HPLC Chromatography of (-)-(2-cyclohexen-1-ylmethyl)-4-(2-pyridyl)-benzene (**30**) (Daicel Chiralcel OD-H column, 5% isopropanol in hexanes, 1 mL/min, 230 nm)

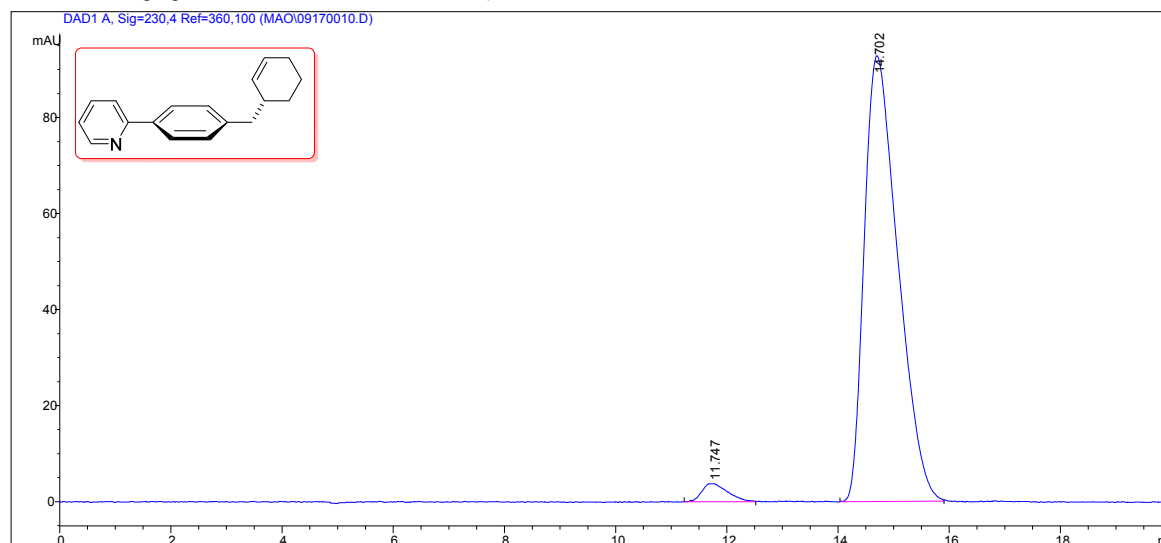

| Peak #   | RetTime [min] | Type | Width [min] | Area [mAU*s] | Height [mAU] | Area %  |
|----------|---------------|------|-------------|--------------|--------------|---------|
| 1        | 11.747        | BB   | 0.3842      | 122.22953    | 3.77035      | 3.0405  |
| 2        | 14.702        | BB   | 0.6178      | 3897.75439   | 92.83849     | 96.9595 |
| Totals : |               |      |             | 4019.98392   | 96.60884     |         |

**Figure S56.** HPLC Chromatography of Racemic (2-cyclohexen-1-ylmethyl)-4-(2-pyridyl)-benzene (**30**) (Daicel Chiralcel OD-H column, 5% isopropanol in hexanes, 1 mL/min, 230 nm)

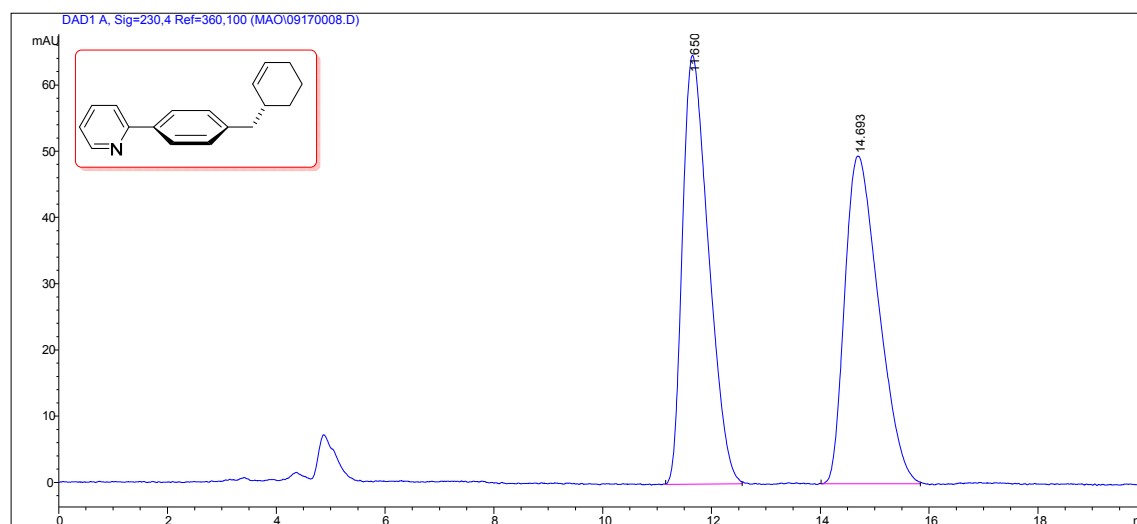

| Peak #   | RetTime [min] | Type | Width [min] | Area [mAU*s] | Height [mAU] | Area %  |
|----------|---------------|------|-------------|--------------|--------------|---------|
| 1        | 11.650        | BB   | 0.4899      | 2150.46533   | 64.68620     | 50.1051 |
| 2        | 14.693        | BB   | 0.6110      | 2141.44702   | 49.47689     | 49.8949 |
| Totals : |               |      |             | 4291.91235   | 114.16308    |         |

**Figure S57.** HPLC Chromatography of (-)-3-(diphenylmethyl)-1-cyclohexene (**3p**) (Daicel Chiralcel OJ-H column, 3% isopropanol in hexanes, 0.8 mL/min, 230 nm)

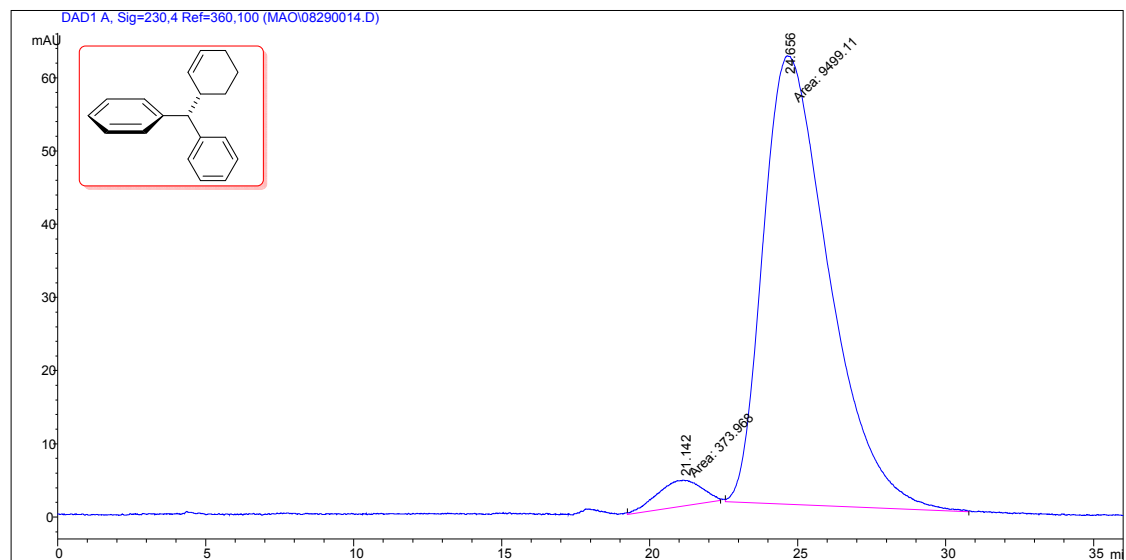

| Peak #   | RetTime [min] | Type | Width [min] | Area [mAU*s] | Height [mAU] | Area %  |
|----------|---------------|------|-------------|--------------|--------------|---------|
| 1        | 21.142        | MM   | 1.7571      | 373.96790    | 3.54730      | 3.7878  |
| 2        | 24.656        | MM   | 2.5846      | 9499.11230   | 61.25507     | 96.2122 |
| Totals : |               |      |             | 9873.08020   | 64.80237     |         |

**Figure S58.** HPLC Chromatography of Reacmic 3-(diphenylmethyl)-1-cyclohexene (**3p**) (Daicel Chiralcel OJ-H column, 3% isopropanol in hexanes, 0.8 mL/min, 230 nm)

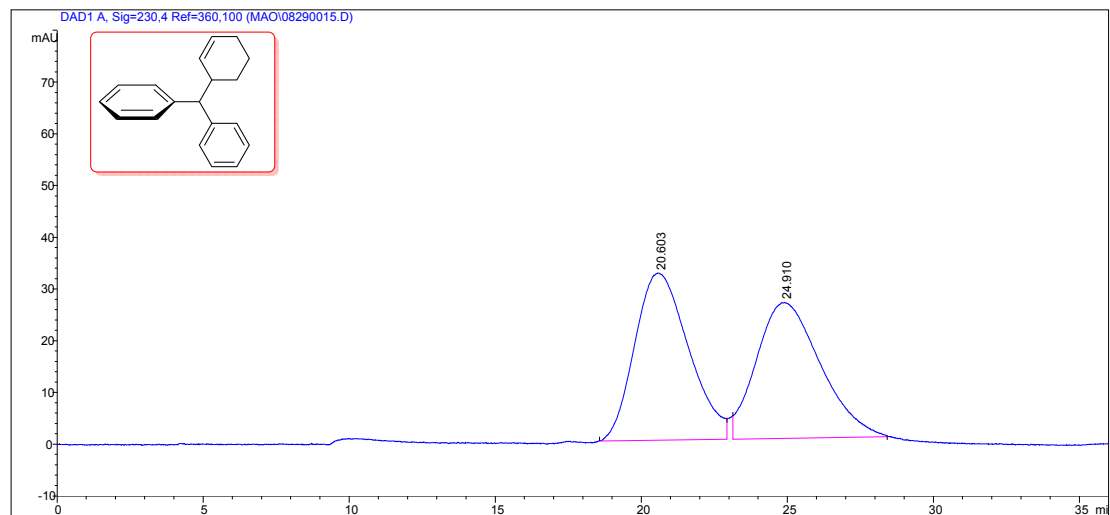

| Peak #   | RetTime [min] | Type | Width [min] | Area [mAU*s] | Height [mAU] | Area %  |
|----------|---------------|------|-------------|--------------|--------------|---------|
| 1        | 20.603        | BV   | 1.5083      | 4142.06152   | 32.29613     | 50.9203 |
| 2        | 24.910        | BB   | 1.7871      | 3992.33179   | 26.23972     | 49.0797 |
| Totals : |               |      |             | 8134.39331   | 58.53584     |         |

**Figure S59.** HPLC Chromatography of 4-(cyclohex-2-en-1-yl(phenyl)methyl)morpholine (**3q**) (Daicel Chiralcel OD-H column, 2% isopropanol in hexanes, 0.6 mL/min, 230 nm)

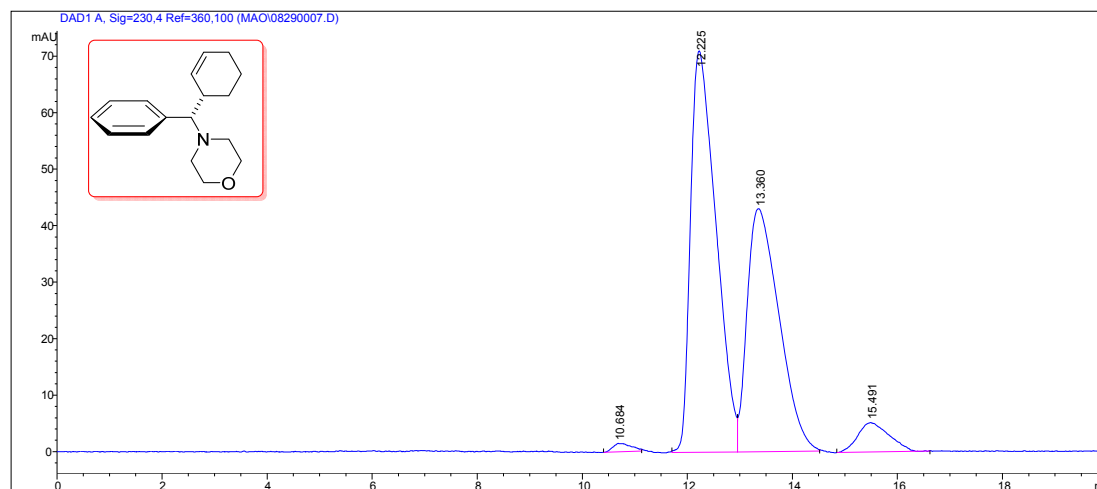

| Peak #   | RetTime [min] | Type | Width [min] | Area [mAU*s] | Height [mAU] | Area %  |
|----------|---------------|------|-------------|--------------|--------------|---------|
| 1        | 10.684        | BB   | 0.2957      | 35.77865     | 1.47155      | 0.8021  |
| 2        | 12.225        | BV   | 0.4847      | 2391.06177   | 71.03177     | 53.6054 |
| 3        | 13.360        | VB   | 0.5868      | 1816.64355   | 43.00996     | 40.7275 |
| 4        | 15.491        | PB   | 0.4949      | 216.99867    | 5.22151      | 4.8649  |
| Totals : |               |      |             | 4460.48265   | 120.73479    |         |

**Figure S60.** HPLC Chromatography of Racemic 4-(cyclohex-2-en-1-yl(phenyl)methyl)morpholine (**3q**) (Daicel Chiralcel OD-H column, 2% isopropanol in hexanes, 0.6 mL/min, 230 nm)

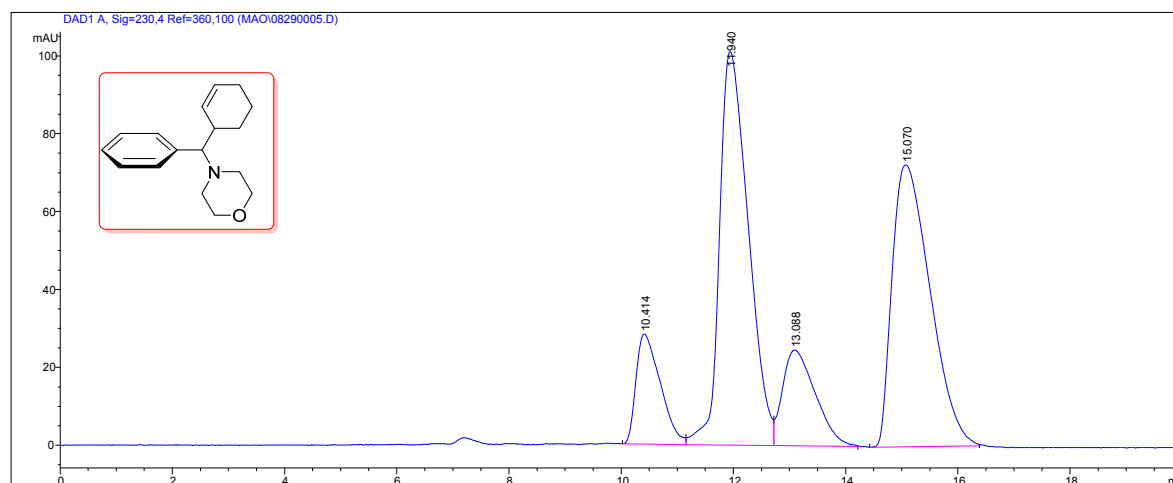

| Peak #   | RetTime [min] | Type | Width [min] | Area [mAU*s] | Height [mAU] | Area %  |
|----------|---------------|------|-------------|--------------|--------------|---------|
| 1        | 10.414        | PV   | 0.4317      | 851.62494    | 28.25228     | 9.6247  |
| 2        | 11.940        | VV   | 0.5279      | 3601.92896   | 101.03686    | 40.7074 |
| 3        | 13.088        | VB   | 0.5497      | 997.35944    | 24.56438     | 11.2717 |
| 4        | 15.070        | PB   | 0.6918      | 3397.42139   | 72.35164     | 38.3962 |
| Totals : |               |      |             | 8848.33472   | 226.20515    |         |

**Figure S61.** HPLC Chromatography of (*E*)-( $\eta^6$ -(2,4-diphenylbut-3-en-1-yl)-(2-thiophenyl)-benzene)Cr(CO)<sub>3</sub> (**3s**) (Daicel Chiralcel AD-H column, 10% isopropanol in hexanes, 1 mL/min, 254 nm)

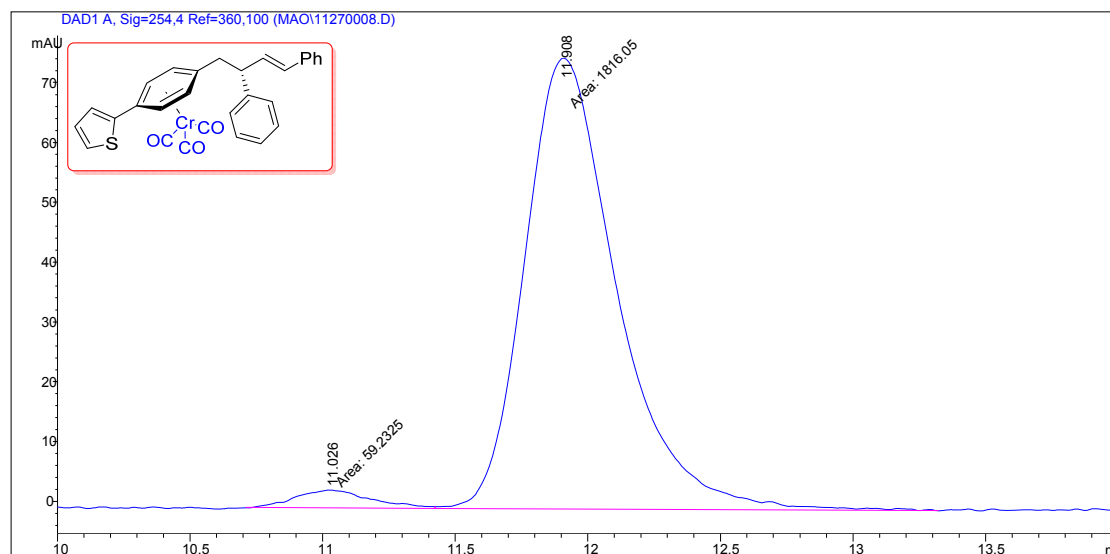

| Peak #   | RetTime [min] | Type | Width [min] | Area [mAU*s] | Height [mAU] | Area %  |
|----------|---------------|------|-------------|--------------|--------------|---------|
| 1        | 11.026        | MF   | 0.3280      | 59.23249     | 3.00956      | 3.1586  |
| 2        | 11.908        | FM   | 0.4014      | 1816.04700   | 75.39764     | 96.8414 |
| Totals : |               |      |             | 1875.27949   | 78.40720     |         |

**Figure S62.** HPLC Chromatography of Racemic (*E*)-( $\eta^6$ -(2,4-diphenylbut-3-en-1-yl)-(2-thiophenyl)-benzene)Cr(CO)<sub>3</sub> (**3s**) (Daicel Chiralcel AD-H column, 10% isopropanol in hexanes, 1 mL/min, 254 nm)

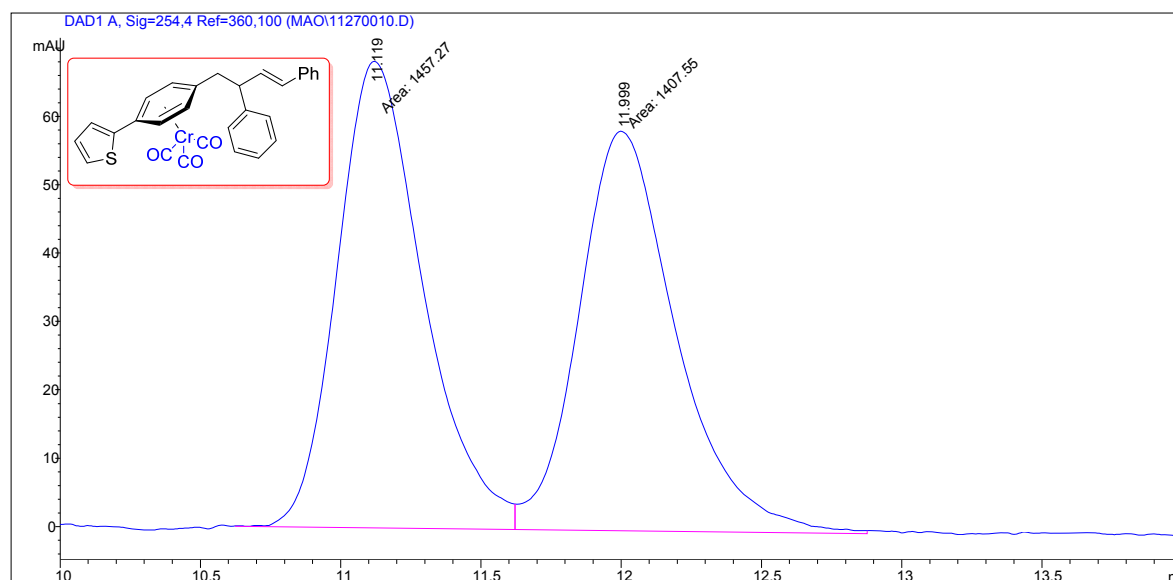

| Peak #   | RetTime [min] | Type | Width [min] | Area [mAU*s] | Height [mAU] | Area %  |
|----------|---------------|------|-------------|--------------|--------------|---------|
| 1        | 11.119        | MF   | 0.3556      | 1457.26794   | 68.30312     | 50.8678 |
| 2        | 11.999        | FM   | 0.4012      | 1407.54651   | 58.47522     | 49.1322 |
| Totals : |               |      |             | 2864.81445   | 126.77834    |         |



**Figure S63.** HPLC Chromatography of (*E*)-( $\eta^6$ -(2,4-diphenylbut-3-en-1-yl)-4-(4-trifluorophenyl)-benzene)Cr(CO)<sub>3</sub> (**3t**) (Daicel Chiralcel AD-H column, 10% isopropanol in hexanes, 1 mL/min, 254 nm)

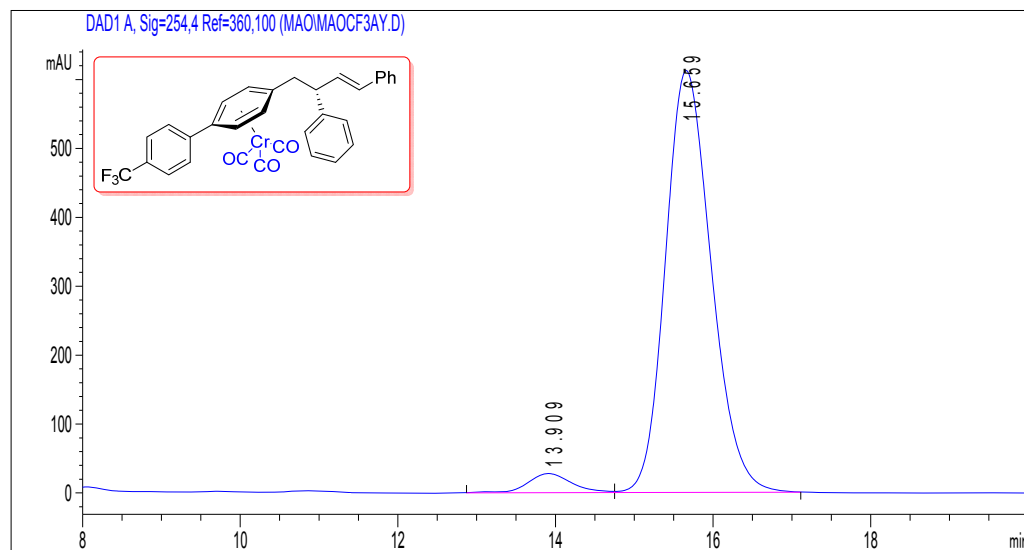

| Peak #   | RetTime [min] | Type | Width [min] | Area [mAU*s] | Height [mAU] | Area %  |
|----------|---------------|------|-------------|--------------|--------------|---------|
| 1        | 13.909        | BV   | 0.5909      | 1101.54919   | 28.00648     | 4.2678  |
| 2        | 15.659        | VB   | 0.6267      | 2.47091e4    | 612.38318    | 95.7322 |
| Totals : |               |      |             | 2.58106e4    | 640.38966    |         |

**Figure S64.** HPLC Chromatography of Racemic (*E*)-( $\eta^6$ -(2,4-diphenylbut-3-en-1-yl)-4-(4-trifluorophenyl)-benzene)Cr(CO)<sub>3</sub> (**3t**) (Daicel Chiralcel AD-H column, 10% isopropanol in hexanes, 1 mL/min, 254 nm)

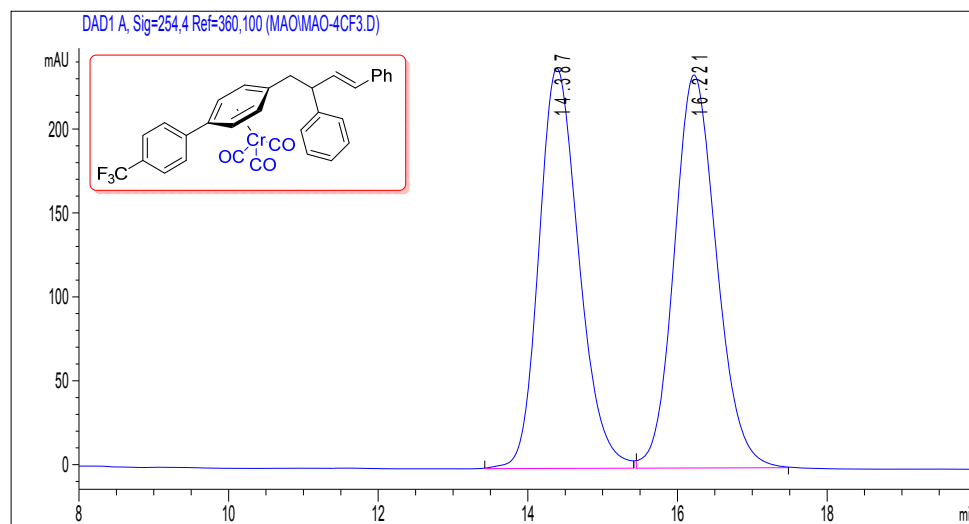

| Peak #   | RetTime [min] | Type | Width [min] | Area [mAU*s] | Height [mAU] | Area %  |
|----------|---------------|------|-------------|--------------|--------------|---------|
| 1        | 14.387        | BB   | 0.5715      | 8861.02441   | 238.47751    | 48.9564 |
| 2        | 16.221        | BB   | 0.6081      | 9238.81348   | 234.24826    | 51.0436 |
| Totals : |               |      |             | 1.80998e4    | 472.72577    |         |

**Figure S65.** HPLC Chromatography of Racemic (*E*)-( $\eta^6$ -(2,4-diphenylbut-3-en-1-yl)-(4-fluorophenyl)-benzene)Cr(CO)<sub>3</sub> (**3v**) (Daicel Chiralpak IB column, 5% isopropanol in hexanes, 0.4 mL/min, 254 nm)

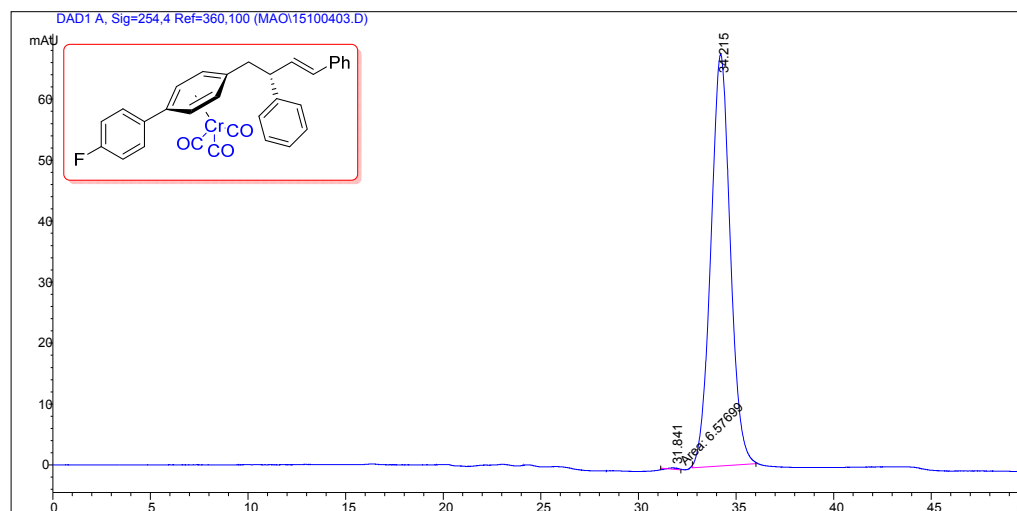

| Peak #   | RetTime [min] | Type | Width [min] | Area [mAU*s] | Height [mAU] | Area %  |
|----------|---------------|------|-------------|--------------|--------------|---------|
| 1        | 31.841        | MM   | 0.5225      | 6.57699      | 2.09774e-1   | 0.1406  |
| 2        | 34.215        | BB   | 0.9814      | 4672.25195   | 67.51069     | 99.8594 |
| Totals : |               |      |             | 4678.82894   | 67.72046     |         |

**Figure S66.** HPLC Chromatography of Racemic (*E*)-( $\eta^6$ -(2,4-diphenylbut-3-en-1-yl)-(4-fluorophenyl)-benzene)Cr(CO)<sub>3</sub> (**3v**) (Daicel Chiralpak IB column, 5% isopropanol in hexanes, 0.4 mL/min, 254 nm)

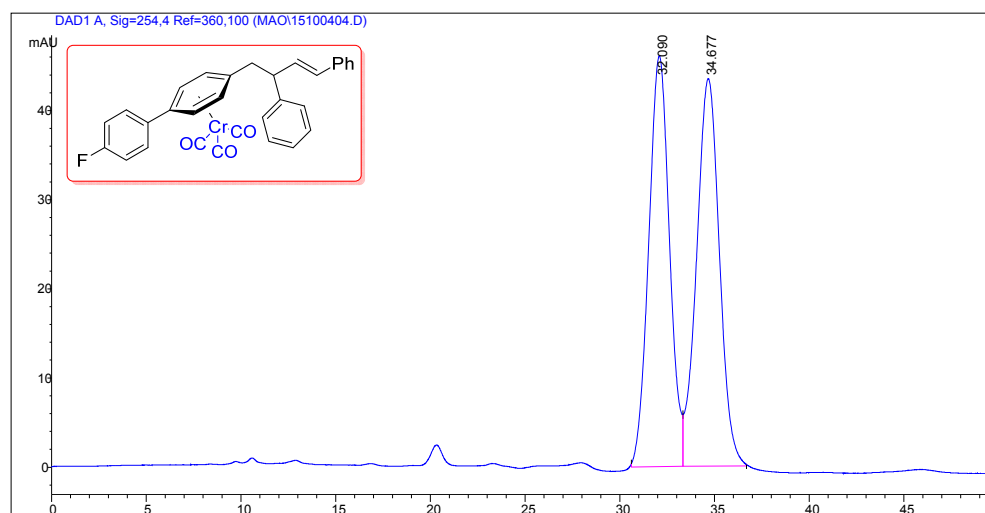

| Peak #   | RetTime [min] | Type | Width [min] | Area [mAU*s] | Height [mAU] | Area %  |
|----------|---------------|------|-------------|--------------|--------------|---------|
| 1        | 32.090        | BV   | 1.0665      | 3500.08691   | 46.06406     | 48.9629 |
| 2        | 34.677        | VB   | 1.1773      | 3648.36597   | 43.46463     | 51.0371 |
| Totals : |               |      |             | 7148.45288   | 89.52869     |         |

**Figure S67.** SFC Chromatography of (*E*)-( $\eta^6$ -(2,4-diphenylbut-3-en-1-yl)-(4-chlorophenyl)-benzene)Cr(CO)<sub>3</sub> (**3u**) (Daicel Chiralcel AD-H column, 10% methanol in CO<sub>2</sub>, 4 mL/min, 254 nm)

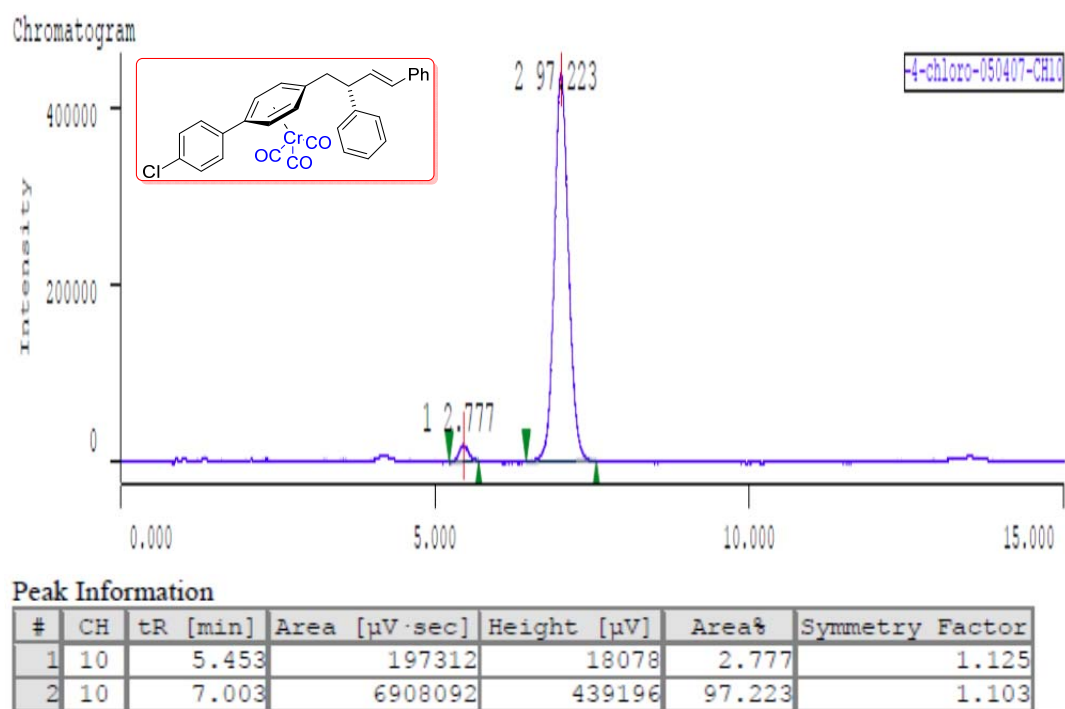

**Figure S68.** HPLC Chromatography of Racemic (*E*)-( $\eta^6$ -(2,4-diphenylbut-3-en-1-yl)-(4-chlorophenyl)-benzene)Cr(CO)<sub>3</sub> (**3u**) (Daicel Chiralcel AD-H column, 10% methanol in CO<sub>2</sub>, 4 mL/min, 254 nm)

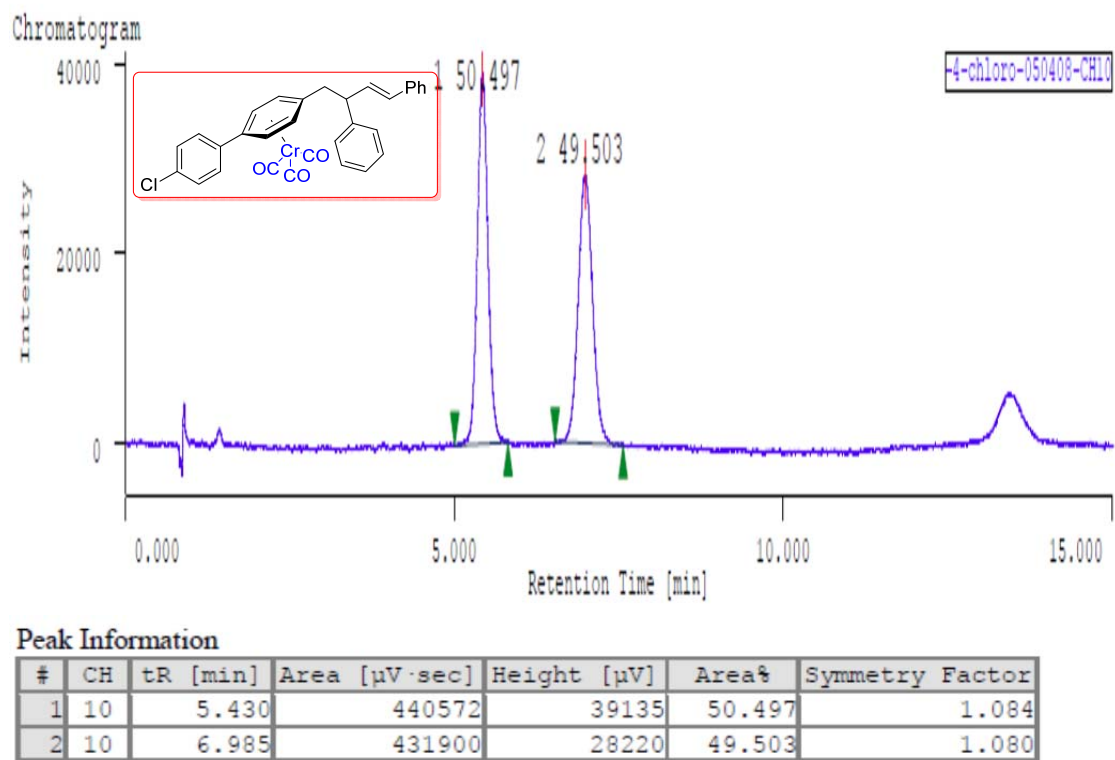

**Figure S69.** SFC Chromatography of (*E*)-( $\eta^6$ -(2,4-diphenylbut-3-en-1-yl)-4-(2-pyridyl)-benzene)Cr(CO)<sub>3</sub> (**3r**) (Daicel Chiralcel AD-H column, 30% methanol in CO<sub>2</sub>, 4 mL/min, 270 nm)

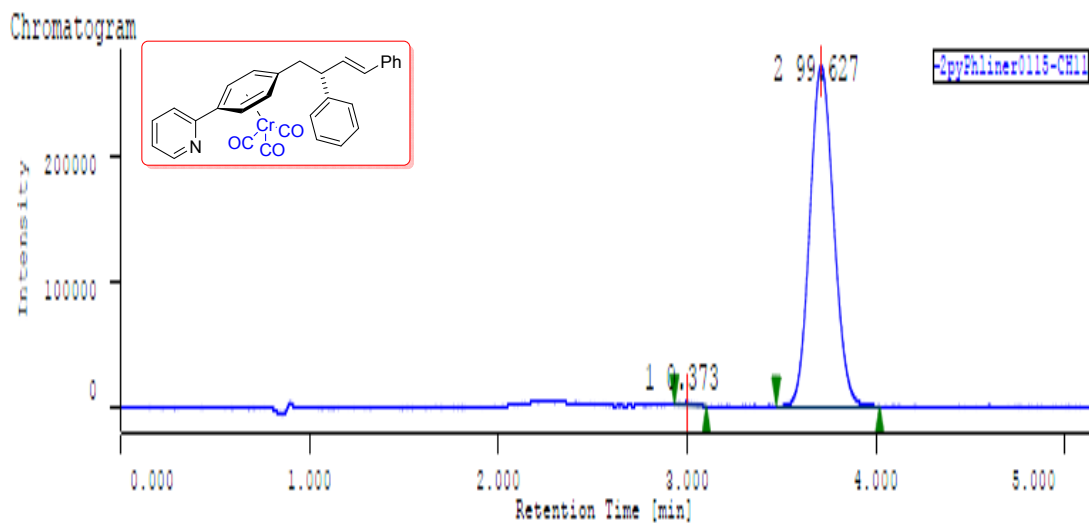

#### Peak Information

| # | CH | tR [min] | Area [ $\mu\text{V}\cdot\text{sec}$ ] | Height [ $\mu\text{V}$ ] | Area%  | Symmetry Factor |
|---|----|----------|---------------------------------------|--------------------------|--------|-----------------|
| 1 | 11 | 2.997    | 8917                                  | 1894                     | 0.373  | 1.217           |
| 2 | 11 | 3.708    | 2382891                               | 271270                   | 99.627 | 1.097           |

**Figure S70.** SFC Chromatography of Racemic (*E*)-( $\eta^6$ -(2,4-diphenylbut-3-en-1-yl)-4-(2-pyridyl)-benzene)Cr(CO)<sub>3</sub> (**3r**) (Daicel Chiralcel AD-H column, 30% methanol in CO<sub>2</sub>, 4 mL/min, 270 nm)

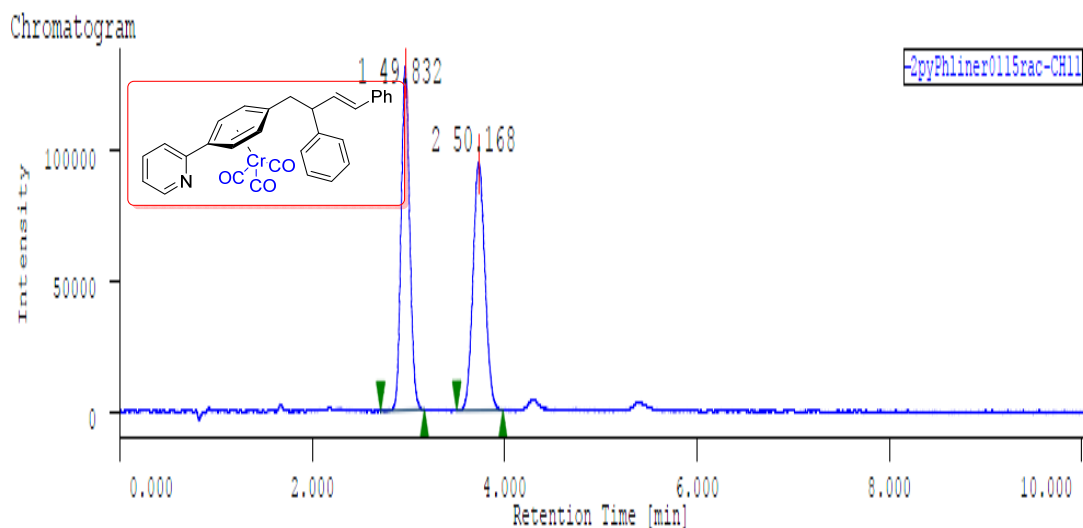

#### Peak Information

| # | CH | tR [min] | Area [ $\mu\text{V}\cdot\text{sec}$ ] | Height [ $\mu\text{V}$ ] | Area%  | Symmetry Factor |
|---|----|----------|---------------------------------------|--------------------------|--------|-----------------|
| 1 | 11 | 2.965    | 821990                                | 131149                   | 49.832 | 1.091           |
| 2 | 11 | 3.728    | 827523                                | 94586                    | 50.168 | 1.073           |

**Figure S71.** SFC Chromatography of (E)-2-(4-(2,4-diphenylbut-3-en-1-yl)phenyl)pyridine (**3y**) (Daicel Chiralcel AD-H column, 30% methanol in CO<sub>2</sub>, 4 mL/min, 270 nm)

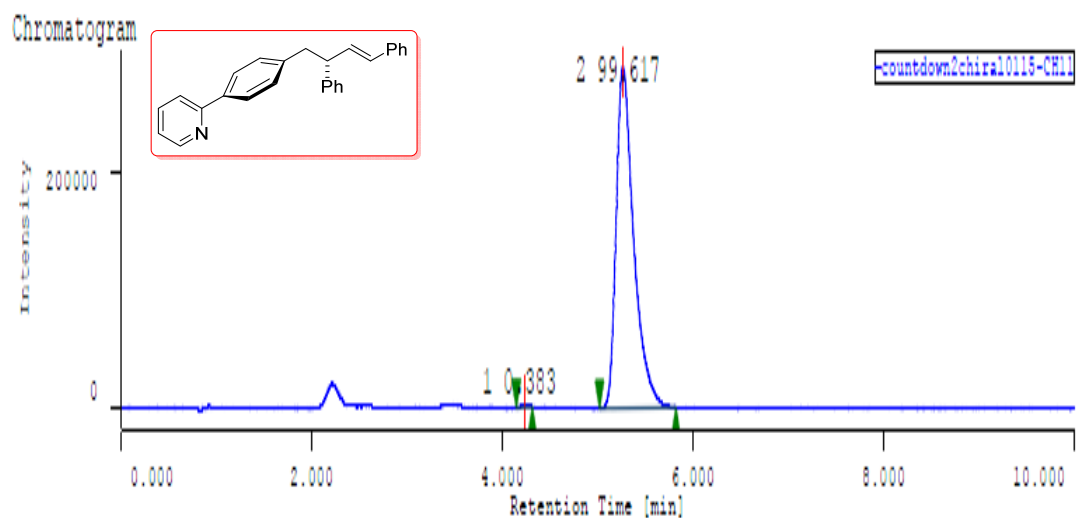

#### Peak Information

| # | CH | tR [min] | Area [ $\mu\text{V}\cdot\text{sec}$ ] | Height [ $\mu\text{V}$ ] | Area%  | Symmetry Factor |
|---|----|----------|---------------------------------------|--------------------------|--------|-----------------|
| 1 | 11 | 4.225    | 14258                                 | 2738                     | 0.383  | 1.035           |
| 2 | 11 | 5.263    | 3713172                               | 289935                   | 99.617 | 1.571           |

**Figure S72.** SFC Chromatography of Racemic (E)-2-(4-(2,4-diphenylbut-3-en-1-yl)phenyl)pyridine (**3y**) (Daicel Chiralcel AD-H column, 30% methanol in CO<sub>2</sub>, 4 mL/min, 270 nm)

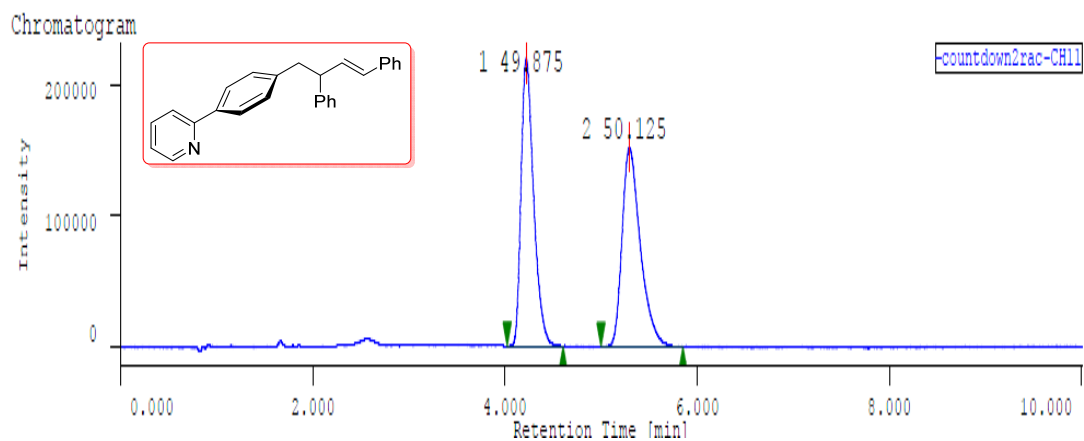

#### Peak Information

| # | CH | tR [min] | Area [ $\mu\text{V}\cdot\text{sec}$ ] | Height [ $\mu\text{V}$ ] | Area%  | Symmetry Factor |
|---|----|----------|---------------------------------------|--------------------------|--------|-----------------|
| 1 | 11 | 4.218    | 1986421                               | 218624                   | 49.875 | 1.407           |
| 2 | 11 | 5.290    | 1996366                               | 150985                   | 50.125 | 1.459           |

**Figure S73.** SFC Chromatography of (-)-2-phenyl-3-(4-(pyridin-2-yl)phenyl)propanoic acid (**4**) (Daicel Chiralpak IA column, 30% methanol in CO<sub>2</sub>, 4 mL/min, 254 nm)

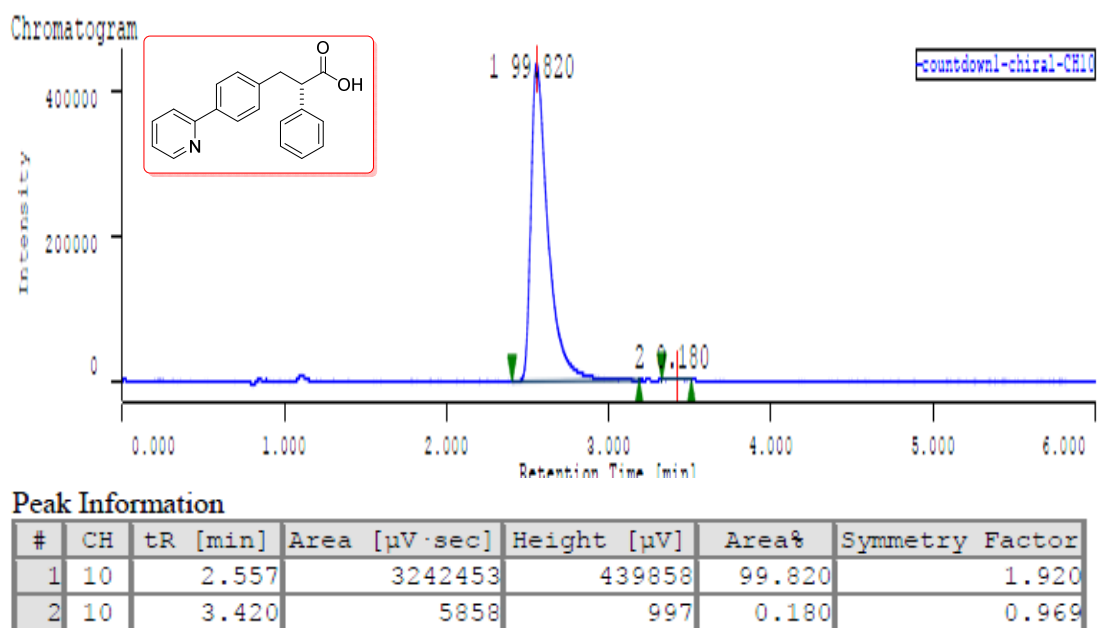

**Figure S74.** SFC Chromatography of Racemic 2-phenyl-3-(4-(pyridin-2-yl)phenyl)propanoic acid (**4**) (Daicel Chiralpak IA column, 30% methanol in CO<sub>2</sub>, 4 mL/min, 254 nm)

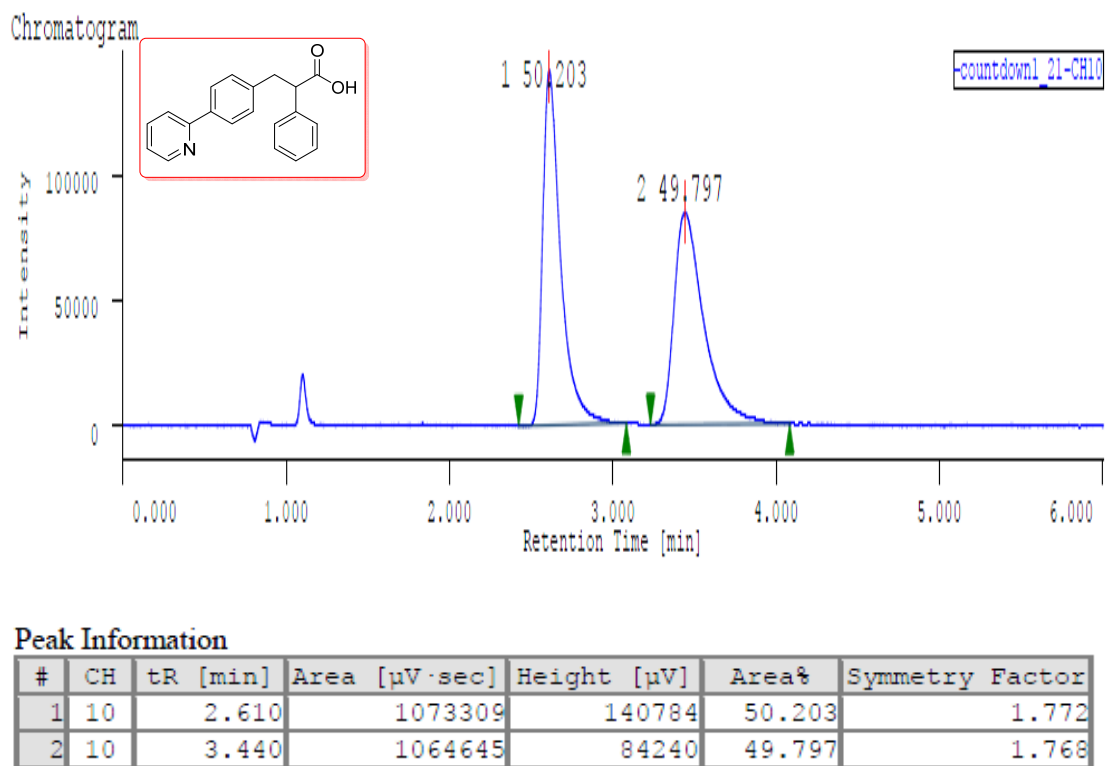

**Figure S75.** HPLC Chromatography of (*E*)-( $\eta^6$ -(2-ethylhex-3-en-1-yl)-4-(2-pyridyl)-benzene)Cr(CO)<sub>3</sub> (**3w**) (Daicel Chiralpak IB column, 1% isopropanol in hexanes, 1 mL/min, 230 nm)

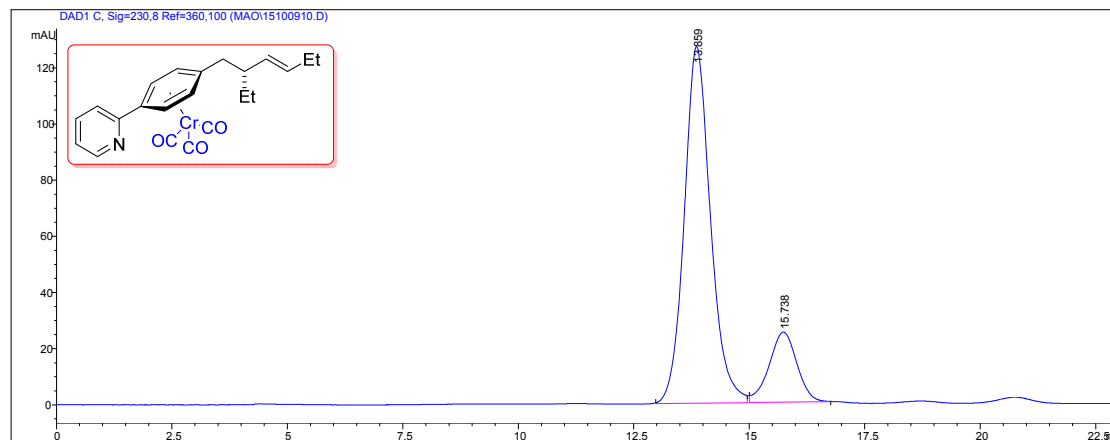

| Peak #   | RetTime [min] | Type | Width [min] | Area [mAU*s] | Height [mAU] | Area %  |
|----------|---------------|------|-------------|--------------|--------------|---------|
| 1        | 13.859        | BB   | 0.5965      | 5013.58496   | 127.01143    | 82.7532 |
| 2        | 15.738        | BB   | 0.6381      | 1044.89441   | 24.97523     | 17.2468 |
| Totals : |               |      |             | 6058.47937   | 151.98665    |         |

**Figure S76.** HPLC Chromatography of Racemic (*E*)-( $\eta^6$ -(2-ethylhex-3-en-1-yl)-4-(2-pyridyl)-benzene)Cr(CO)<sub>3</sub> (**3w**) (Daicel Chiralpak IB column, 1% isopropanol in hexanes, 1 mL/min, 230 nm)

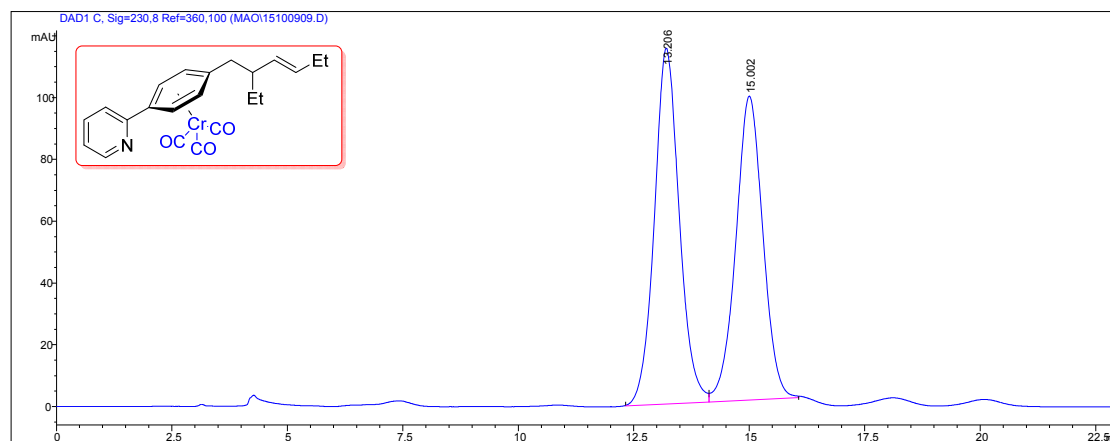

| Peak #   | RetTime [min] | Type | Width [min] | Area [mAU*s] | Height [mAU] | Area %  |
|----------|---------------|------|-------------|--------------|--------------|---------|
| 1        | 13.206        | BV   | 0.5676      | 4320.83545   | 115.18378    | 51.8978 |
| 2        | 15.002        | VB   | 0.6231      | 4004.82471   | 98.33588     | 48.1022 |
| Totals : |               |      |             | 8325.66016   | 213.51966    |         |

**Figure S77.** SFC Chromatography of ( $\eta^6$ -(5-phenyl-2-cyclohexen-1-ylmethyl)-benzene)Cr(CO)<sub>3</sub> (**3x**) (Daicel Chiralpak IA column, 10% methanol in CO<sub>2</sub>, 4 mL/min, 270 nm)

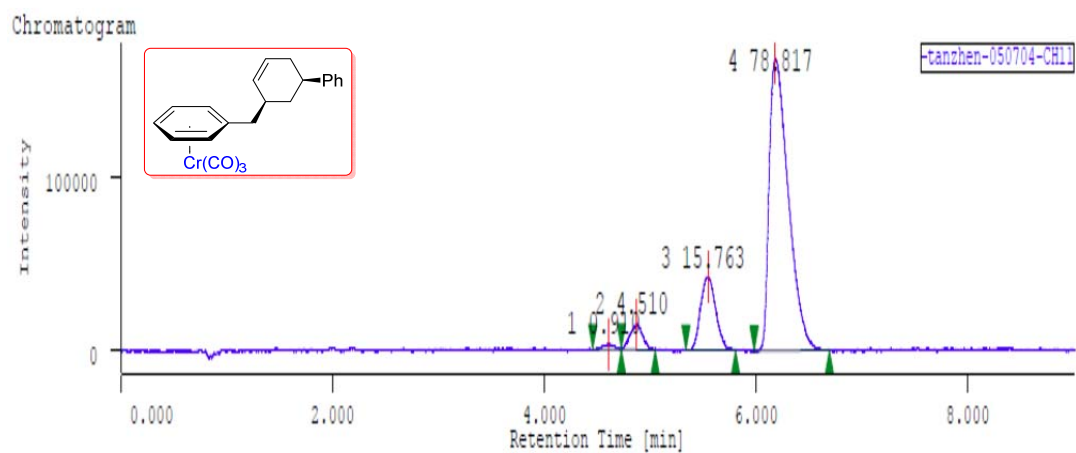

**Peak Information**

| # | CH | tR [min] | Area [ $\mu\text{V}\cdot\text{sec}$ ] | Height [ $\mu\text{V}$ ] | Area%  | Symmetry Factor |
|---|----|----------|---------------------------------------|--------------------------|--------|-----------------|
| 1 | 11 | 4.605    | 24159                                 | 3083                     | 0.910  | N/A             |
| 2 | 11 | 4.868    | 119792                                | 14244                    | 4.510  | 1.008           |
| 3 | 11 | 5.542    | 418647                                | 42068                    | 15.763 | 1.121           |
| 4 | 11 | 6.178    | 2093342                               | 167512                   | 78.817 | 1.852           |

**Figure S78.** SFC Chromatography of racemic ( $\eta^6$ -(5-phenyl-2-cyclohexen-1-ylmethyl)-benzene)Cr(CO)<sub>3</sub> (**3x**) (Daicel Chiralpak IA column, 10% methanol in CO<sub>2</sub>, 4 mL/min, 270 nm)

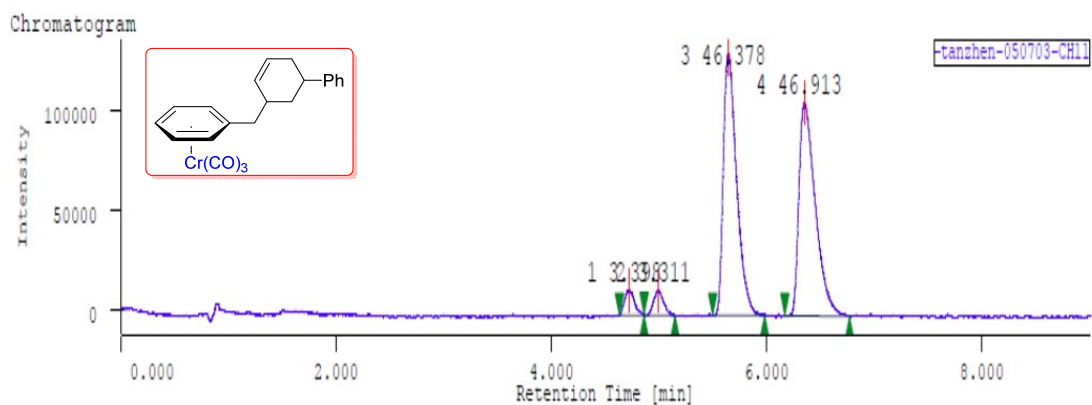

**Peak Information**

| # | CH | tR [min] | Area [ $\mu\text{V}\cdot\text{sec}$ ] | Height [ $\mu\text{V}$ ] | Area%  | Symmetry Factor |
|---|----|----------|---------------------------------------|--------------------------|--------|-----------------|
| 1 | 11 | 4.722    | 82346                                 | 12742                    | 3.398  | 1.237           |
| 2 | 11 | 4.990    | 80243                                 | 12377                    | 3.311  | 1.144           |
| 3 | 11 | 5.640    | 1123865                               | 131826                   | 46.378 | 1.604           |
| 4 | 11 | 6.347    | 1136824                               | 107196                   | 46.913 | 1.804           |



## 10. References

- [1] B. M. Trost, S. Malhotra, D. E. Olson, A. Maruniak, J. Du Bois, *J. Am. Chem. Soc.* **2009**, *131*, 4190-4191.
- [2] J. A. Chudek, G. Hunter, R. L. MacKay, P. Kremminger, K. Schloegl, W. Weissensteiner, *J. Chem. Soc., Dalton Trans.* **1990**, 2001-2005.
- [3] D. A. Brown, J. R. Raju, *J. Chem. Soc. A* **1966**, 1617-1620.
- [4] J. Zhang, C. Stanciu, B. Wang, M. M. Hussain, C.-S. Da, P. J. Carroll, S. D. Dreher, P. J. Walsh, *J. Am. Chem. Soc.* **2011**, *133*, 20552-20560.
- [5] H. P. Fritz, C. G. Kreiter, *J. Organomet. Chem.* **1967**, *7*, 427-440.
- [6] D. J. Cram, D. I. Wilkinson, *J. Am. Chem. Soc.* **1960**, *82*, 5721-5723.
- [7] M. Uemura, H. Nishimura, K. Kamikawa, K. Nakayama, Y. Hayashi, *Tetrahedron Lett.* **1994**, *35*, 1909-1912.
- [8] S. Pasquini, C. Mugnaini, C. Tintori, M. Botta, A. Trejos, R. K. Arvela, M. Larhed, M. Witvrouw, M. Michiels, F. Christ, Z. Debyser, F. Corelli, *J. Med. Chem.* **2008**, *51*, 5125-5129.
